# Supplementary material for: A fine-tuned β-catenin regulation during proliferation of corneal endothelial cells revealed using proteomics analysis
Source: PubMed Central journal article supplement (PMC7427785; doi:10.1038/s41598-020-70800-w), 2020-08-14
Supplement: 41598_2020_70800_MOESM1_ESM.pdf [file 41598_2020_70800_MOESM1_ESM.pdf]

## **A fine-tuned $\beta$ -catenin regulation during proliferation of corneal endothelial cells revealed using proteomics analysis**

Eleonora Maurizi<sup>1,4</sup>, Davide Schirotti<sup>2</sup>, Roberta Zini<sup>1</sup>, Anna Limongelli<sup>3</sup>, Raffaella Mistò<sup>3</sup>, Claudio Macaluso<sup>4</sup>, and Graziella Pellegrini<sup>1</sup>

### **Affiliations**

1. Centre for Regenerative Medicine “S. Ferrari” Department of Life Sciences, University of Modena and Reggio Emilia, Modena, Italy
2. Department of Life Sciences, University of Modena and Reggio Emilia, Modena, Italy
3. Eye Bank, San Gerardo Hospital, Monza, Italy
4. Department of Medicine and Surgery, University of Parma, Italy

**Supplementary Figure S1** Human cultured CEnC cell cycle phases was assessed at 60% confluence and different passages by cytofluorimeter following PI staining. Cultured CEnC morphology was observed by Axiovert 40C inverted microscope (Zeiss), objective 5x, at the passage prior to the cytofluorimetric assay. (A) Human CEnC at passage 2, showing a polygonal morphology, presents 20.8%±2.3% of its population in G2/M of the cell cycle. (B) Human CEnC at passage 4 are undergoing EnMT process and the percentage of cells in G2/M increases to 35±3.5%. Results are presented as mean ± Standard Error (SE), n=3.

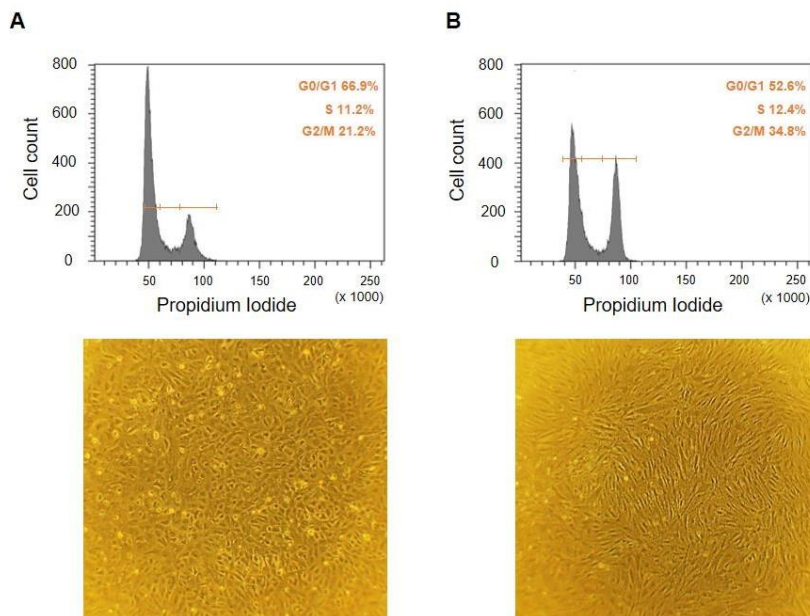

**Supplementary Figure S2** Heat map showing the differentially expressed proteins between the cultured rCEnC (C1, C2, C3, each including a pool of five growing cultures obtained from left rabbit eyes at passage 1, 60% confluent) and the non-proliferating rCEnC isolated from the tissue (T1, T2, T3, each including a pool of cells isolated from the right five corresponding eyes). In (A), 19 proteins differentially expressed are represented with a  $p < 0.001$ ; in (B), 77 proteins with a  $p < 0.005$ .

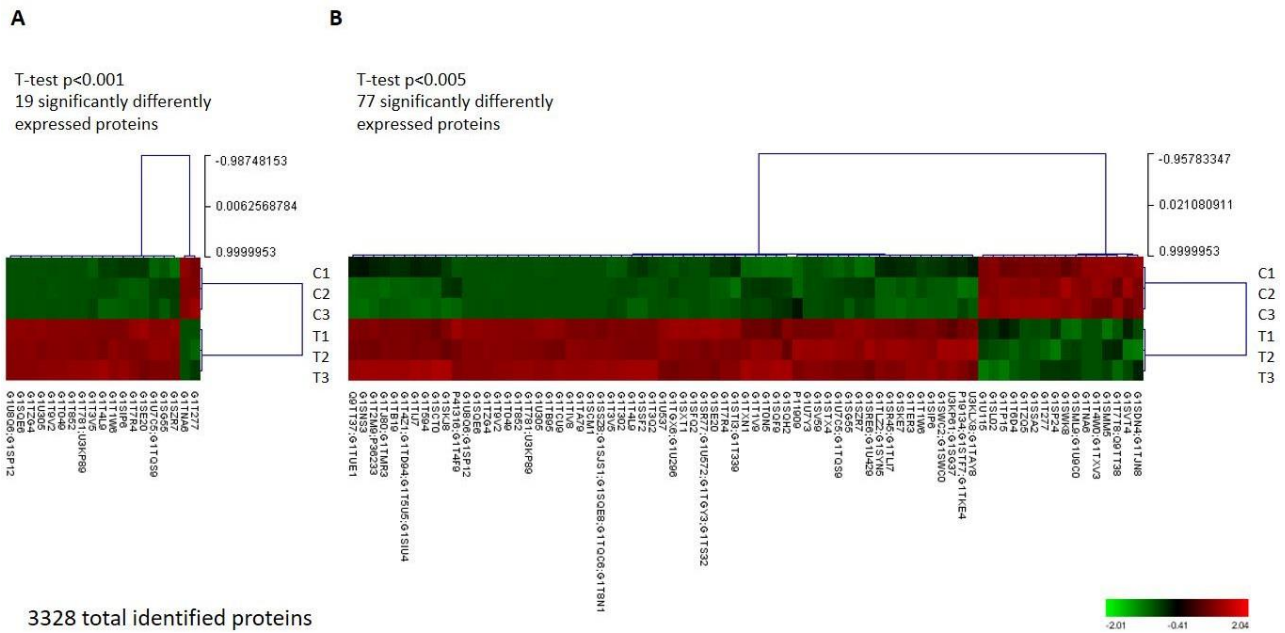

**Supplementary Figure S3. Vitality assay upon CHIR99021 treatment on rCEnC.** The panel shows representative immunofluorescence images of calcein AM (green, left column), propidium iodide (red, central column) and merge with DAPI in blue (right column). rCEnC were treated with H<sub>2</sub>O<sub>2</sub> (top row) as a positive control and then with Mock DMSO control, CHIR99021 0.5μM and 10μM at the same conditions used for the experiment shown in Figure 5. Scale bar 50 μM, n=3 biological replicates for each condition.

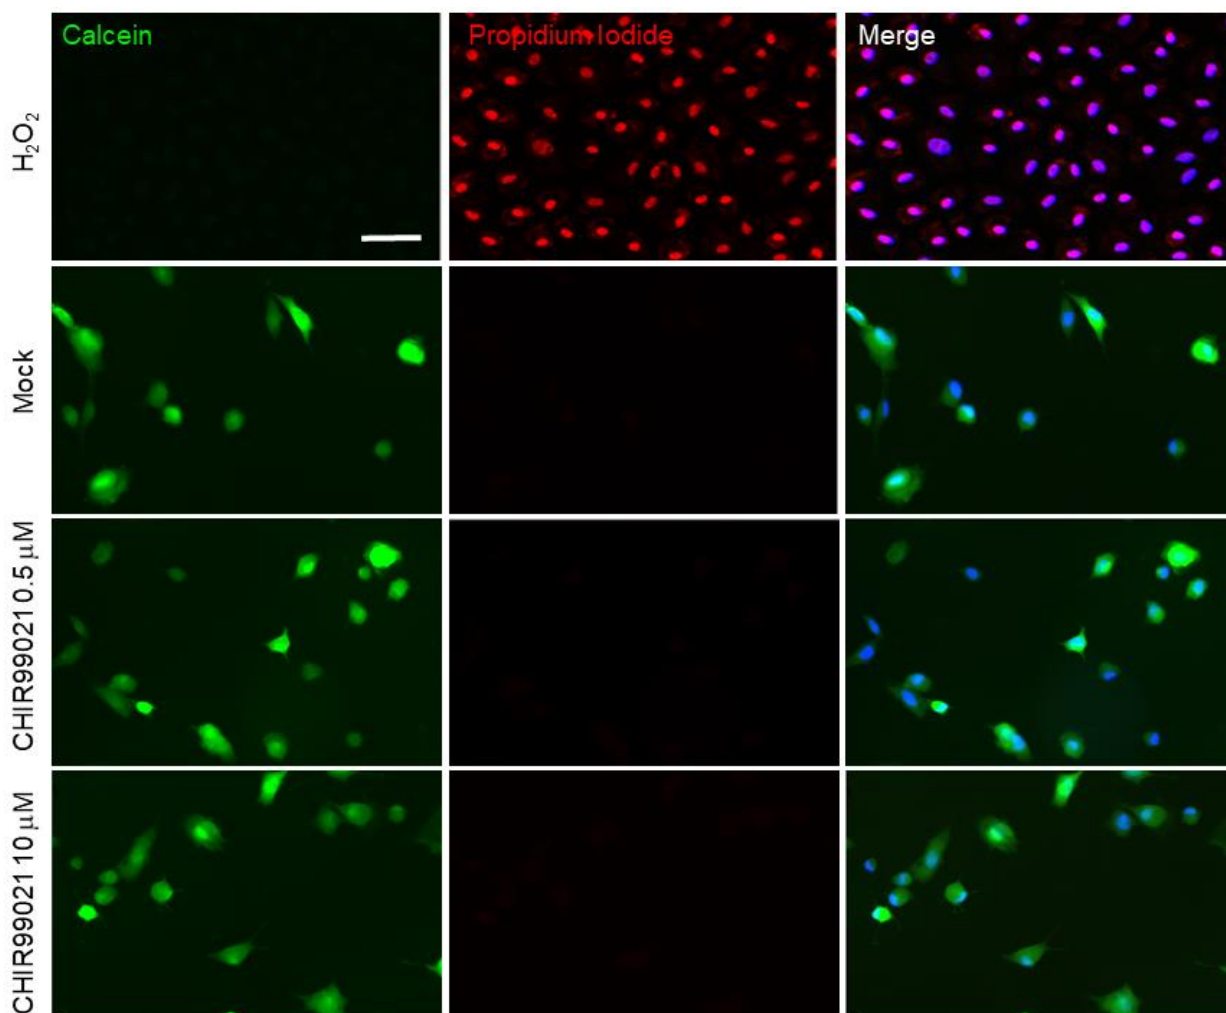

**Supplementary Table S1** Full protein dataset including the 3328 proteins identified

| Protein IDs              | EM_C1    | EM_C2    | EM_C3    | EM_T1    | EM_T2    | EM_T3    |
|--------------------------|----------|----------|----------|----------|----------|----------|
| U3KP46                   | 0        | 3,06E+08 | 0        | 0        | 0        | 0        |
| G1SGH0;G1U414;G1U3L5     | 6,64E+09 | 9,8E+09  | 1,2E+10  | 6,11E+09 | 7,79E+09 | 1,2E+10  |
| G1T1V0;G1SWB8;G1T4Q6     | 3,95E+10 | 3,96E+09 | 1,41E+10 | 1,31E+10 | 1,16E+10 | 1,07E+10 |
| G1SDN2                   | 0        | 0        | 0        | 0        | 2,23E+08 | 0        |
| G1T8T1                   | 0        | 0        | 0        | 0        | 0        | 59019000 |
| G1SY72;G1TYI7;G1SHZ4     | 0        | 0        | 0        | 0        | 47592000 | 0        |
| G1U9R4                   | 0        | 29398000 | 0        | 0        | 0        | 0        |
| P29338;A0A0A0MQQ6;G1STZ1 | 7,37E+08 | 3E+09    | 2,73E+09 | 2,76E+08 | 5,22E+08 | 5,07E+08 |
| A0A0B4J1Q3;P01847;G1TKP3 | 0        | 0        | 0        | 2,36E+08 | 0        | 0        |
| A0A0B4J1Q4;G1U2K3;G1TB60 | 4,43E+08 | 1,45E+09 | 1,76E+09 | 3,14E+08 | 3E+08    | 2,34E+08 |
| P02103;P02099;G1TPE2     | 3,16E+08 | 1,1E+09  | 4,15E+08 | 2,72E+09 | 1,6E+10  | 1,53E+09 |
| A0A140TAW0;Q6XLQ7        | 5,27E+10 | 1,63E+10 | 1,48E+10 | 1,89E+10 | 1,83E+10 | 2,74E+10 |
| A2IBH5                   | 0        | 0        | 0        | 5,72E+08 | 0        | 0        |
| A7X8X3;G1T5F2            | 4,81E+08 | 4,19E+09 | 4,73E+09 | 3,11E+08 | 4,52E+08 | 8,89E+08 |
| B6V9S9                   | 1,77E+10 | 6,29E+10 | 6,73E+10 | 9,22E+09 | 9,19E+09 | 9,08E+09 |
| B7NZD2                   | 3,56E+09 | 9,02E+09 | 8,89E+09 | 3,32E+09 | 4,11E+09 | 4,11E+09 |
| B7NZE9;G1T0U9;O77814     | 6,09E+08 | 0        | 0        | 7,88E+08 | 3,22E+09 | 6,18E+08 |
| B7NZG7                   | 7,68E+08 | 4,18E+09 | 4,11E+09 | 1,6E+09  | 2,27E+09 | 1,74E+09 |
| B7NZI5                   | 3,03E+09 | 5,51E+09 | 5,94E+09 | 4,23E+08 | 3,86E+08 | 5,47E+08 |
| B7NZJ1                   | 0        | 5,03E+08 | 3,71E+08 | 1,62E+08 | 2,15E+08 | 1,28E+08 |
| B7NZJ4                   | 4,62E+08 | 0        | 1,93E+08 | 2,67E+08 | 3,48E+08 | 2,46E+08 |
| B7NZK2                   | 1,74E+09 | 1,01E+09 | 7,53E+08 | 1,99E+09 | 2,26E+09 | 2,77E+09 |
| B7NZM4                   | 0        | 2,57E+08 | 3,6E+08  | 0        | 0        | 0        |
| B7NZM8                   | 3,08E+09 | 1,57E+10 | 1,57E+10 | 1,19E+09 | 1,23E+09 | 1,08E+09 |
| G1TBW2;B7NZN8            | 7,6E+09  | 1,64E+09 | 1,68E+09 | 1,93E+09 | 1,98E+09 | 1,88E+09 |
| B7NZN9                   | 2,06E+10 | 5,84E+09 | 6,12E+09 | 1,76E+10 | 1,76E+10 | 1,68E+10 |
| B7NZQ0                   | 9,48E+08 | 7,25E+08 | 9,23E+08 | 2,83E+09 | 2,76E+09 | 3,87E+09 |
| B7NZQ2;G1U2A1;G1T117     | 6,42E+09 | 3,4E+10  | 2,84E+10 | 8,54E+09 | 7,97E+09 | 7,32E+09 |
| B7NZQ6                   | 1,59E+09 | 6,55E+09 | 7,86E+09 | 1,09E+09 | 2,02E+09 | 1,2E+09  |
| B7NZQ9                   | 0        | 99639000 | 0        | 0        | 0        | 2,15E+08 |
| C1IYH7                   | 90632000 | 0        | 0        | 63524000 | 1,65E+08 | 1,11E+08 |
| C6ZII8                   | 0        | 0        | 0        | 0        | 53895000 | 0        |
| G1SCE1                   | 0        | 0        | 2,12E+08 | 0        | 0        | 0        |
| G1SCE6                   | 1,53E+08 | 2,63E+08 | 7,08E+08 | 1,56E+08 | 0        | 0        |
| G1SCE7                   | 2,57E+10 | 4,36E+09 | 3,98E+09 | 1,9E+10  | 1,31E+10 | 1,24E+10 |
| G1SCF0;P13834            | 0        | 1,54E+08 | 2,41E+08 | 1,4E+08  | 0        | 1,4E+08  |
| G1SCF4                   | 3,77E+08 | 1,96E+09 | 1,52E+09 | 3,15E+08 | 2,96E+08 | 1,34E+08 |
| G1SCF6                   | 1,1E+09  | 2,36E+08 | 2,38E+08 | 2,66E+08 | 2,48E+08 | 2,74E+08 |
| G1SCG8                   | 2,77E+08 | 2,32E+08 | 0        | 4,03E+08 | 0        | 0        |
| G1SCIO                   | 1,71E+09 | 5,28E+09 | 8,34E+09 | 1,37E+09 | 1,11E+09 | 6,39E+08 |
| G1SCI5                   | 3,29E+09 | 1,14E+09 | 7,47E+08 | 6,11E+08 | 6E+08    | 5,33E+08 |
| G1SCI9;G1TI92;G1U1U4     | 5,22E+08 | 4,95E+09 | 4,52E+09 | 5,41E+08 | 5,23E+08 | 1,02E+09 |
| G1SCJ5                   | 4,41E+09 | 1,6E+09  | 1,45E+09 | 4,71E+09 | 3,59E+09 | 4,1E+09  |
| G1TRV3;G1SCJ6;G1TVT6     | 4,45E+09 | 1,85E+10 | 1,79E+10 | 5,37E+09 | 6,27E+09 | 5,43E+09 |
| G1SCJ9                   | 3,18E+08 | 0        | 0        | 8,22E+08 | 7,97E+08 | 8,67E+08 |
| G1SCK0                   | 2,88E+09 | 1,31E+09 | 9,42E+08 | 2,82E+09 | 2,07E+09 | 9,56E+08 |
| G1SCK7                   | 0        | 0        | 0        | 0        | 1,08E+08 | 0        |

|                      |          |          |          |          |          |          |
|----------------------|----------|----------|----------|----------|----------|----------|
| G1SCL2               | 0        | 0        | 0        | 0        | 0        | 2,27E+08 |
| G1SCM1               | 0        | 0        | 0        | 1,74E+09 | 1,8E+09  | 1,97E+09 |
| G1SCM2;G1TMH6        | 1,46E+09 | 5,65E+08 | 4,53E+08 | 2,76E+09 | 1,76E+09 | 2,5E+09  |
| G1SCM7;G1ST10        | 4,24E+08 | 1,02E+09 | 4,87E+08 | 3,09E+08 | 5,11E+08 | 4,34E+08 |
| G1SCN1;G1TU10        | 0        | 0        | 0        | 3,23E+08 | 3,2E+08  | 0        |
| G1SCN8               | 1,22E+10 | 2,86E+10 | 3,21E+10 | 5,76E+09 | 5,99E+09 | 5,41E+09 |
| G1SCP0               | 0        | 2,77E+08 | 3,77E+08 | 1,61E+08 | 0        | 0        |
| G1SCP7;G1TKE7;G1T2T2 | 4,97E+09 | 8,22E+09 | 8,31E+09 | 2,6E+09  | 2,34E+09 | 2,1E+09  |
| G1SCP8               | 8,55E+09 | 2,8E+10  | 2,86E+10 | 2,35E+09 | 2,53E+09 | 1,67E+09 |
| G1SCQ0               | 0        | 0        | 0        | 1,6E+08  | 0        | 0        |
| G1SCQ1               | 4,67E+09 | 4,65E+09 | 5,5E+09  | 4,19E+09 | 3,54E+09 | 4,5E+09  |
| G1SCQ6               | 5,72E+08 | 0        | 0        | 4,81E+08 | 0        | 0        |
| G1SCRO               | 1,13E+09 | 5,83E+08 | 4,05E+08 | 2,9E+09  | 2,98E+09 | 3,17E+09 |
| G1SCR1               | 0        | 1,11E+08 | 82587000 | 3,41E+08 | 1,27E+08 | 94621000 |
| G1SCR7               | 2,83E+09 | 1,03E+09 | 1,29E+09 | 2,23E+09 | 1,31E+09 | 7,89E+08 |
| G1SCS0               | 0        | 0        | 1,48E+08 | 2,98E+08 | 0        | 0        |
| G1SCS8               | 1,75E+08 | 0        | 0        | 69620000 | 0        | 0        |
| G1SCT0               | 1,31E+11 | 3,59E+10 | 3,35E+10 | 4,80E+11 | 5,22E+11 | 6,61E+11 |
| G1SCT1               | 1,16E+09 | 3,63E+09 | 4,34E+09 | 8,38E+08 | 1,19E+09 | 1,07E+09 |
| G1SCT9;G1TQ26        | 1,05E+09 | 3,53E+08 | 3,33E+08 | 2,54E+09 | 2,39E+09 | 1,26E+09 |
| G1SCU8               | 0        | 3,61E+08 | 6,96E+08 | 2,37E+08 | 0        | 1,67E+08 |
| G1SCW0               | 3,52E+09 | 9,09E+08 | 7,92E+08 | 1,42E+09 | 2,74E+09 | 3,42E+09 |
| G1SCW7               | 4,33E+08 | 1,57E+09 | 1,73E+09 | 4,16E+08 | 5,14E+08 | 4,07E+08 |
| G1SCX1;G1TA25;U3KMG2 | 0        | 0        | 0        | 0        | 0        | 8,94E+08 |
| G1SCY3               | 0        | 4,31E+08 | 0        | 0        | 0        | 0        |
| G1SCY4               | 5,64E+09 | 7,18E+09 | 8,55E+09 | 1,69E+09 | 2,64E+09 | 2,08E+09 |
| G1SCY7               | 4,71E+09 | 8,73E+08 | 1,12E+09 | 4,04E+09 | 3,2E+09  | 1,78E+09 |
| G1SCY8               | 1,19E+09 | 4,36E+08 | 5,12E+08 | 0        | 0        | 0        |
| G1SCZ4;U3KN50        | 5,54E+08 | 4,8E+08  | 4,71E+08 | 3,03E+08 | 2,92E+08 | 3,11E+08 |
| G1SCZ9               | 8,69E+08 | 3,54E+08 | 3,55E+08 | 7,08E+08 | 7,45E+08 | 5,37E+08 |
| G1SD02               | 3,93E+08 | 2,1E+09  | 1,43E+09 | 8,99E+08 | 7,33E+08 | 6,69E+08 |
| G1TC05;O46480;G1SD04 | 0        | 1,55E+08 | 0        | 0        | 0        | 0        |
| G1SD05;G1TI13        | 9,94E+08 | 8,24E+09 | 5,1E+09  | 7,36E+08 | 5,44E+08 | 4,56E+08 |
| G1SD09               | 3,5E+09  | 1,29E+09 | 1,33E+09 | 1,93E+09 | 1,75E+09 | 3,72E+09 |
| G1SD25               | 1,02E+08 | 1,17E+08 | 0        | 66859000 | 0        | 0        |
| G1SD27               | 0        | 2,51E+08 | 2,87E+08 | 2,49E+08 | 2,6E+08  | 3,55E+08 |
| G1SD30               | 0        | 0        | 0        | 0        | 1,68E+08 | 0        |
| G1SD44               | 1,56E+09 | 3,61E+08 | 3,47E+08 | 1,1E+09  | 9,8E+08  | 1,06E+09 |
| G1SD48               | 2,69E+09 | 6,97E+08 | 5,25E+08 | 1,97E+09 | 2,12E+09 | 3,3E+09  |
| G1SD49               | 0        | 5,18E+08 | 7,08E+08 | 0        | 1,16E+08 | 96482000 |
| G1SD50               | 2,19E+09 | 6,2E+08  | 7,31E+08 | 2,44E+09 | 1,45E+09 | 1,09E+09 |
| G1SD54               | 6,06E+08 | 2,05E+08 | 1,53E+08 | 1,69E+08 | 0        | 0        |
| G1SD77               | 1,99E+08 | 4,08E+08 | 2,62E+08 | 3,5E+08  | 4,09E+08 | 5,2E+08  |
| G1SD83               | 1,08E+10 | 2,92E+09 | 3,54E+09 | 1,81E+08 | 39539000 | 1E+08    |
| G1SD87;G1TLX0;G1TN12 | 62090000 | 0        | 0        | 0        | 0        | 0        |
| G1SD91               | 0        | 5,15E+08 | 6,22E+08 | 0        | 0        | 0        |
| G1SD92               | 0        | 0        | 0        | 1,89E+09 | 1,62E+09 | 9,72E+08 |
| G1U5X9;G1TXJ9;G1SD95 | 98311000 | 5,99E+08 | 4,49E+08 | 9,63E+08 | 1,4E+09  | 1,61E+09 |
| G1U727;G1SD98        | 2,27E+08 | 0        | 0        | 1E+08    | 0        | 0        |
| G1SD99               | 0        | 0        | 0        | 1,2E+09  | 9,27E+08 | 9,07E+08 |

|                      |          |          |          |          |          |          |
|----------------------|----------|----------|----------|----------|----------|----------|
| G1SDA4               | 1,85E+09 | 5,89E+09 | 5,33E+09 | 1,43E+09 | 9,83E+08 | 5,29E+08 |
| G1SDA8               | 4,01E+09 | 6,77E+09 | 6,88E+09 | 2,17E+09 | 2,16E+09 | 1,67E+09 |
| G1SDA9               | 2,4E+08  | 0        | 1,07E+08 | 4,03E+08 | 1,17E+08 | 1,54E+08 |
| G1SDB3               | 6,15E+08 | 2,78E+08 | 2,42E+08 | 2,94E+08 | 3,48E+08 | 3,47E+08 |
| G1SDC7               | 3,67E+08 | 1,62E+09 | 2,2E+09  | 7,19E+08 | 6,11E+08 | 1,06E+09 |
| G1SDD0               | 2,57E+10 | 8,73E+09 | 7,94E+09 | 2,12E+10 | 2,41E+10 | 3,71E+10 |
| G1SDD7               | 1,03E+08 | 0        | 0        | 0        | 0        | 0        |
| G1SDE1               | 3,08E+08 | 0        | 0        | 2,76E+08 | 0        | 0        |
| G1SDF2               | 9,73E+08 | 2,97E+09 | 3,31E+09 | 2,19E+09 | 2,58E+09 | 2,47E+09 |
| G1SDG2               | 3,56E+08 | 1,29E+09 | 1,07E+09 | 0        | 2,52E+08 | 0        |
| G1SDG8               | 5,53E+08 | 7,21E+08 | 8,12E+08 | 2,99E+08 | 1,66E+08 | 2,07E+08 |
| G1SDH2               | 7,21E+08 | 1,75E+08 | 1,91E+08 | 0        | 0        | 1,44E+08 |
| G1SDH3               | 1,56E+09 | 1,9E+08  | 1,78E+08 | 1,48E+08 | 1,54E+08 | 1,85E+08 |
| G1SDH5               | 0        | 1,11E+09 | 9,69E+08 | 2,04E+08 | 1,65E+08 | 3,44E+08 |
| G1SDJ0;G1U695;G1TN15 | 2E+10    | 1,32E+10 | 1,53E+10 | 2,31E+10 | 2,74E+10 | 2,49E+10 |
| G1SDJ3               | 4,2E+09  | 1,07E+09 | 1,06E+09 | 5,9E+09  | 5,29E+09 | 5,26E+09 |
| G1SDJ7               | 9,07E+08 | 1,85E+09 | 2,18E+09 | 8,87E+08 | 7,91E+08 | 8,08E+08 |
| G1SDK0               | 0        | 0        | 1,13E+08 | 0        | 0        | 0        |
| G1SDK5               | 0        | 0        | 0        | 0        | 1,41E+08 | 0        |
| G1SDK8               | 0        | 1,19E+09 | 1,73E+09 | 5,33E+08 | 1,94E+08 | 2,33E+08 |
| G1SDK9               | 1,3E+08  | 0        | 0        | 0        | 0        | 0        |
| G1TWY4;G1SDL3        | 8,11E+08 | 5,64E+08 | 3,51E+08 | 1,17E+09 | 7,38E+08 | 6,88E+08 |
| G1SDL7;Q4VK78        | 5,68E+08 | 0        | 0        | 0        | 2,12E+08 | 3,73E+08 |
| G1SDL9               | 6,08E+08 | 3,36E+08 | 1,94E+08 | 1,81E+09 | 9,22E+08 | 1,49E+09 |
| G1SDM0;G1T9R6        | 1,24E+08 | 2,68E+08 | 1,77E+08 | 0        | 98697000 | 0        |
| G1SDM2               | 3,31E+09 | 1,07E+09 | 8,73E+08 | 1,82E+09 | 1,34E+09 | 7,83E+08 |
| G1SDM6               | 54750000 | 63716000 | 67989000 | 90361000 | 0        | 0        |
| G1SDN1;G1SW87        | 9E+08    | 1,38E+09 | 1,53E+09 | 1,84E+09 | 1,62E+09 | 1,46E+09 |
| G1SDN3               | 5,79E+08 | 5,94E+09 | 6,1E+09  | 5,45E+08 | 5,34E+08 | 6,52E+08 |
| G1SDN4;G1TJN8        | 1,45E+10 | 1,39E+10 | 1,39E+10 | 1,01E+10 | 9,4E+09  | 1,07E+10 |
| G1SDN8               | 1,06E+09 | 4,44E+08 | 2,37E+08 | 5,64E+09 | 4,32E+09 | 6,02E+09 |
| G1SDN9               | 3,88E+08 | 0        | 1,89E+08 | 0        | 3,63E+08 | 5,76E+08 |
| G1SDP2               | 2,57E+10 | 1,15E+10 | 1,06E+10 | 2,7E+10  | 2,74E+10 | 3,96E+10 |
| G1SDR2               | 3,45E+08 | 2,01E+09 | 1,58E+09 | 8,82E+08 | 1E+09    | 1,4E+09  |
| G1SDS3               | 0        | 1,32E+08 | 0        | 0        | 0        | 0        |
| G1SDT0               | 2,82E+08 | 0        | 0        | 0        | 0        | 0        |
| G1SDU1               | 1,29E+08 | 4,86E+08 | 2,98E+08 | 3,19E+08 | 5,17E+08 | 7,55E+08 |
| G1SDU2               | 0        | 0        | 2,3E+08  | 0        | 0        | 0        |
| G1SDU5               | 8,53E+08 | 2,72E+09 | 3,07E+09 | 2,17E+09 | 1,44E+09 | 1,36E+09 |
| G1SDU6               | 3,08E+08 | 8,29E+08 | 6,8E+08  | 2,42E+08 | 2,6E+08  | 2,51E+08 |
| G1SDU8               | 1,31E+09 | 0        | 1,03E+08 | 3,2E+08  | 3,16E+08 | 3,49E+08 |
| G1TGU3;G1SDV0        | 2,22E+08 | 0        | 0        | 0        | 0        | 0        |
| G1SDV3               | 3,47E+08 | 7,78E+08 | 5,18E+08 | 4,94E+08 | 4,17E+08 | 4,73E+08 |
| G1SDV5               | 1,28E+08 | 0        | 0        | 0        | 0        | 0        |
| G1SDW3               | 5,26E+08 | 0        | 0        | 1,1E+09  | 9,08E+08 | 7,24E+08 |
| G1SDW8               | 2,89E+09 | 8,39E+08 | 1,12E+09 | 0        | 3,11E+08 | 1,87E+08 |
| G1SDX2               | 1,39E+09 | 1,72E+08 | 2,19E+08 | 2,31E+08 | 2,19E+08 | 2,01E+08 |
| G1SDX3               | 2,35E+09 | 1,86E+08 | 1,05E+08 | 1,97E+08 | 1,71E+08 | 94463000 |
| G1SDX5               | 7,4E+08  | 2,32E+08 | 1,71E+08 | 1,36E+09 | 8,85E+08 | 5,04E+08 |
| G1SDX9               | 1,72E+08 | 0        | 0        | 2,59E+08 | 3,92E+08 | 1,8E+08  |

|                      |          |          |          |          |          |          |
|----------------------|----------|----------|----------|----------|----------|----------|
| G1SDY5               | 3,1E+10  | 1,10E+11 | 1,19E+11 | 1,68E+10 | 2,64E+10 | 2,35E+10 |
| G1SDZ0               | 5,62E+09 | 2,37E+09 | 1,96E+09 | 2,47E+09 | 3,18E+09 | 3,17E+09 |
| G1SDZ7               | 0        | 1,92E+08 | 1,9E+08  | 0        | 0        | 0        |
| G1SDZ9               | 3,06E+08 | 0        | 0        | 0        | 0        | 0        |
| G1SE10               | 9,21E+08 | 2,98E+08 | 3,17E+08 | 3,55E+08 | 3,09E+08 | 2,58E+08 |
| G1SE12               | 6,05E+10 | 1,73E+10 | 1,74E+10 | 3,01E+10 | 3,45E+10 | 4,62E+10 |
| G1SE20               | 3,68E+08 | 2,24E+08 | 2,32E+08 | 1,67E+09 | 1,48E+09 | 1,39E+09 |
| G1SE27               | 3,46E+09 | 9,78E+08 | 7,99E+08 | 4,84E+09 | 6,47E+09 | 7,43E+09 |
| G1SE28;G1TLD5;G1TH55 | 2,79E+09 | 1,49E+10 | 1,31E+10 | 4,26E+09 | 4,45E+09 | 3,41E+09 |
| G1SE36;P56201        | 1,52E+09 | 6,37E+08 | 4,53E+08 | 7,78E+08 | 4,9E+08  | 5,47E+08 |
| G1SE37;U3KN93        | 1,92E+09 | 3,51E+08 | 3,31E+08 | 3,39E+08 | 4,74E+08 | 4,79E+08 |
| G1SE39               | 0        | 2,78E+08 | 3,32E+08 | 2,56E+08 | 3,8E+08  | 4,21E+08 |
| G1SE41               | 0        | 0        | 0        | 4,3E+08  | 4,22E+08 | 6,99E+08 |
| G1SE46               | 8,33E+08 | 8,25E+08 | 5,74E+08 | 4,06E+09 | 2,97E+09 | 3,65E+09 |
| G1SE50               | 3,22E+08 | 1,24E+09 | 6,71E+08 | 0        | 5,41E+08 | 3,95E+08 |
| G1SE51               | 5,79E+08 | 5,12E+08 | 6,8E+08  | 5,4E+08  | 5,78E+08 | 6,81E+08 |
| G1SE56               | 8,45E+08 | 4,24E+08 | 5,06E+08 | 4,97E+08 | 8,35E+08 | 4,85E+08 |
| G1SE57               | 8,07E+09 | 1,05E+10 | 1,01E+10 | 8,72E+09 | 6,91E+09 | 5,66E+09 |
| G1SE61;Q9MZD2        | 4,85E+09 | 1,19E+10 | 1,35E+10 | 1,17E+10 | 9,55E+09 | 7,31E+09 |
| G1SE63               | 0        | 0        | 0        | 2,28E+08 | 0        | 0        |
| G1SE67               | 0        | 3,24E+08 | 3,7E+08  | 0        | 1,96E+08 | 2,77E+08 |
| G1TRP8;G1SE76;G1TF04 | 5,03E+09 | 1,93E+10 | 1,82E+10 | 7,06E+09 | 6,29E+09 | 6,93E+09 |
| G1SE78               | 44176000 | 0        | 0        | 0        | 0        | 0        |
| G1SE87               | 4,83E+08 | 3,68E+08 | 3,97E+08 | 1,12E+10 | 6,36E+09 | 5,22E+09 |
| G1SE88               | 3,81E+09 | 9,59E+08 | 9,13E+08 | 1,26E+09 | 1,51E+09 | 1,61E+09 |
| G1SE95               | 3,21E+10 | 7,94E+10 | 9,32E+10 | 1,82E+10 | 1,28E+10 | 1,13E+10 |
| G1SE97               | 0        | 0        | 0        | 0        | 3,17E+08 | 0        |
| G1SEA8               | 0        | 1,33E+08 | 1,68E+08 | 0        | 0        | 0        |
| G1SEC8               | 2,56E+09 | 3,14E+08 | 2,78E+08 | 2,75E+08 | 3,13E+08 | 1,15E+08 |
| G1SEC9               | 8,72E+09 | 3,15E+09 | 2,46E+09 | 4,96E+09 | 6,59E+09 | 6,59E+09 |
| G1SED7               | 0        | 0        | 0        | 0        | 1,37E+08 | 0        |
| G1SED9               | 2,52E+08 | 4,07E+09 | 3,62E+09 | 44318000 | 47512000 | 0        |
| G1SEE0               | 1,94E+09 | 4,51E+09 | 4,07E+09 | 3,99E+09 | 4,98E+09 | 7,36E+09 |
| G1SEF1               | 7,14E+09 | 1,16E+09 | 1,04E+09 | 5,09E+09 | 4,71E+09 | 4,95E+09 |
| G1SEF8               | 1,05E+10 | 4,81E+09 | 4,37E+09 | 7,26E+09 | 8,54E+09 | 1,05E+10 |
| G1SEH7               | 4,82E+09 | 7,12E+08 | 5,85E+08 | 3,79E+09 | 3,95E+09 | 5,78E+09 |
| G1SEI0               | 1,7E+09  | 9,53E+08 | 9,2E+08  | 2,06E+09 | 2,06E+09 | 2,17E+09 |
| G1SEI8               | 4,79E+08 | 1,36E+08 | 1,07E+08 | 2,26E+08 | 2,52E+08 | 4,02E+08 |
| G1SEJ4;G1TQ38        | 1,05E+10 | 7,57E+09 | 7,5E+09  | 6,74E+09 | 8,64E+09 | 7,25E+09 |
| G1SEJ5               | 0        | 0        | 0        | 0        | 4,84E+08 | 3,14E+08 |
| G1SEJ8               | 46650000 | 0        | 0        | 0        | 0        | 0        |
| P62143;G1SEK1        | 5,73E+08 | 3,06E+09 | 3,02E+09 | 1,78E+09 | 1,82E+09 | 1,5E+09  |
| G1SEK2               | 0        | 2,56E+08 | 1,58E+08 | 90462000 | 0        | 0        |
| G1SEL8               | 5,84E+09 | 3,04E+09 | 2,87E+09 | 1,13E+10 | 1,43E+10 | 1,22E+10 |
| G1SEM0               | 8,38E+08 | 2E+09    | 1,67E+09 | 3,77E+08 | 6,38E+08 | 0        |
| G1SEN8               | 3,67E+09 | 7,74E+08 | 8,77E+08 | 1,04E+10 | 6,56E+09 | 4,76E+09 |
| G1SEQ2               | 2,24E+08 | 1,36E+09 | 1,55E+09 | 3,58E+08 | 4,99E+08 | 4,71E+08 |
| G1SEQ7               | 0        | 2,58E+08 | 1,35E+08 | 0        | 1,08E+08 | 0        |
| G1SER3               | 6,68E+09 | 1,73E+09 | 1,83E+09 | 7,96E+09 | 6,13E+09 | 4,39E+09 |
| G1SER8               | 9,14E+09 | 4,98E+10 | 4,66E+10 | 3,35E+09 | 5,28E+09 | 3,88E+09 |

|                      |          |          |          |          |          |          |
|----------------------|----------|----------|----------|----------|----------|----------|
| G1SER9               | 0        | 2E+08    | 2,18E+08 | 0        | 0        | 0        |
| G1SES2;G1SYK9        | 4,56E+08 | 4,84E+09 | 3,95E+09 | 3,94E+08 | 3,17E+08 | 3,65E+08 |
| G1SES4;G1T5L8        | 4,84E+08 | 1,52E+09 | 1,45E+09 | 2,2E+09  | 2,23E+09 | 2,27E+09 |
| G1SES5               | 93449000 | 1,3E+08  | 95580000 | 0        | 0        | 0        |
| G1SES8               | 7,96E+09 | 2,3E+09  | 2,14E+09 | 1,89E+09 | 2,23E+09 | 2,14E+09 |
| G1SES9;U3KMZ3        | 4,81E+09 | 1,81E+10 | 1,87E+10 | 4,23E+09 | 5,08E+09 | 3,69E+09 |
| G1SET0               | 3,91E+09 | 7,56E+09 | 9,6E+09  | 4,16E+09 | 3,25E+09 | 2,47E+09 |
| G1SEU9               | 9,66E+08 | 4,65E+08 | 0        | 7,8E+08  | 9,76E+08 | 9,46E+08 |
| G1SEV2;G1TTY0        | 2,67E+11 | 1,52E+11 | 1,32E+11 | 4,09E+11 | 4,39E+11 | 6,37E+11 |
| G1SEV7               | 1,23E+08 | 1,78E+09 | 3,37E+09 | 35823000 | 41305000 | 90615000 |
| G1SEW2               | 3,08E+08 | 1,5E+08  | 1,72E+08 | 2,14E+08 | 2,09E+08 | 2,98E+08 |
| G1SEW3;G1TZC2        | 2,47E+09 | 5,62E+08 | 7,07E+08 | 3,62E+08 | 3,02E+08 | 1,68E+08 |
| G1SEW5               | 5,5E+08  | 2,74E+08 | 2,63E+08 | 2,79E+08 | 1,85E+08 | 2,46E+08 |
| G1SEX0               | 1,69E+08 | 0        | 0        | 1,13E+09 | 4,5E+08  | 1,9E+08  |
| G1SEX5               | 0        | 4,98E+08 | 1,82E+08 | 94170000 | 1,18E+08 | 1,45E+08 |
| G1SEZ0;G1T6Y3;G1SF90 | 4,84E+08 | 2,82E+08 | 2,21E+08 | 3,17E+08 | 3,05E+08 | 3,35E+08 |
| G1SF08;G1U7Y8;G1U062 | 2,14E+09 | 1,06E+10 | 7,71E+09 | 1,77E+09 | 1,79E+09 | 1,57E+09 |
| G1SF32               | 1,24E+10 | 3,74E+09 | 4,18E+09 | 1,85E+10 | 1,72E+10 | 2,43E+10 |
| G1SF35               | 79424000 | 0        | 0        | 0        | 0        | 0        |
| G1SF36               | 2,07E+10 | 6,03E+09 | 5,72E+09 | 1,96E+10 | 1,45E+10 | 9,52E+09 |
| G1SF38               | 0        | 2,49E+08 | 0        | 0        | 0        | 2,33E+08 |
| G1SF45               | 2,34E+08 | 0        | 0        | 0        | 0        | 0        |
| G1SF47;G1SKQ9        | 1,03E+09 | 5,8E+09  | 6,46E+09 | 1,25E+09 | 1,55E+09 | 1,41E+09 |
| G1SF51               | 0        | 0        | 0        | 0        | 0        | 6,32E+08 |
| G1SF58               | 1,02E+08 | 0        | 0        | 0        | 0        | 0        |
| G1SF64               | 2,08E+08 | 0        | 0        | 0        | 0        | 0        |
| G1SF70               | 0        | 0        | 0        | 0        | 0        | 2,03E+08 |
| G1SF78               | 4,53E+08 | 0        | 0        | 0        | 0        | 0        |
| G1SF82               | 4,85E+09 | 1,35E+09 | 1,31E+09 | 4,77E+09 | 6,99E+09 | 1,09E+10 |
| G1SF95               | 1,33E+10 | 1,12E+10 | 9,76E+09 | 2,82E+10 | 3,18E+10 | 3,88E+10 |
| G1SF97               | 2,44E+09 | 8,6E+08  | 1,08E+09 | 9,2E+08  | 1,11E+09 | 9,73E+08 |
| G1SFA0;G1SR02        | 0        | 1,03E+08 | 1E+08    | 0        | 0        | 0        |
| G1SFB2               | 1,54E+09 | 3,54E+08 | 3,59E+08 | 6,62E+08 | 5,95E+08 | 5,19E+08 |
| U3KPD0;G1SFC1        | 1,15E+09 | 8,61E+08 | 6,08E+08 | 1,39E+09 | 1,67E+09 | 1,76E+09 |
| G1THY6;G1SFC4        | 5,55E+08 | 1,24E+08 | 1,73E+08 | 1,04E+09 | 4,65E+08 | 7,09E+08 |
| G1SFC5;G1SFC8        | 9,56E+08 | 2,93E+09 | 3,11E+09 | 1,01E+09 | 1,39E+09 | 1,47E+09 |
| G1SFC6               | 9,22E+08 | 2,33E+08 | 1,98E+08 | 2,74E+08 | 2,94E+08 | 4,68E+08 |
| G1SFD5               | 0        | 0        | 0        | 0        | 0        | 2,6E+08  |
| G1SFD8;U3KNQ7        | 1,67E+09 | 6,18E+08 | 7,4E+08  | 2,52E+09 | 2,05E+09 | 2,02E+09 |
| G1SFE0               | 3,62E+09 | 5,92E+09 | 6,95E+09 | 1,45E+09 | 1,37E+09 | 2,09E+09 |
| G1SFE6               | 43034000 | 76321000 | 0        | 57967000 | 0        | 64291000 |
| G1SFE9               | 8,16E+08 | 1,37E+09 | 1,89E+09 | 2,6E+08  | 2,78E+08 | 5,53E+08 |
| G1SFF2               | 3,48E+09 | 8,28E+08 | 7,83E+08 | 1,14E+09 | 9,24E+08 | 7,56E+08 |
| G1SFF5               | 2,53E+08 | 0        | 0        | 0        | 0        | 0        |
| G1SFF7               | 3,25E+09 | 1,25E+09 | 1,12E+09 | 2,39E+10 | 1,85E+10 | 1,45E+10 |
| Q9N1E2;G1SFG6        | 3,39E+09 | 1,1E+10  | 1,22E+10 | 3,92E+09 | 5,04E+09 | 2,66E+09 |
| G1SFG7               | 2E+10    | 1,89E+09 | 4,64E+09 | 4,47E+08 | 0        | 1,75E+08 |
| G1SFH4               | 3,44E+09 | 9,03E+08 | 1,08E+09 | 1,54E+09 | 2,31E+09 | 2,47E+09 |
| G1SFH5               | 3,26E+10 | 1,53E+10 | 1,35E+10 | 5,22E+10 | 4,19E+10 | 5,49E+10 |
| G1SFH6               | 7,78E+08 | 3,37E+09 | 3,32E+09 | 1,04E+09 | 1,15E+09 | 1,23E+09 |



|                      |          |          |          |          |          |          |
|----------------------|----------|----------|----------|----------|----------|----------|
| G1SFH8               | 1,52E+08 | 3,36E+08 | 2,45E+08 | 0        | 0        | 0        |
| G1SFH9               | 8,46E+09 | 3,23E+09 | 3,68E+09 | 1,99E+10 | 1,52E+10 | 1,31E+10 |
| G1SFI4               | 1,21E+08 | 78442000 | 0        | 2,83E+08 | 1,35E+08 | 1,05E+08 |
| G1SFI7               | 1,3E+09  | 7,5E+09  | 5,52E+09 | 1,74E+09 | 1,55E+09 | 2,19E+09 |
| G1SFJ8               | 0        | 1,27E+09 | 9,89E+08 | 8,21E+08 | 1,24E+09 | 1,26E+09 |
| G1SFJ9               | 1,62E+08 | 6,36E+08 | 5,46E+08 | 0        | 0        | 0        |
| G1SFK3               | 6,87E+08 | 1,83E+09 | 2,25E+09 | 4,72E+08 | 5,01E+08 | 4,19E+08 |
| G1SFL5               | 2,46E+08 | 5,82E+08 | 1,28E+09 | 0        | 3,25E+08 | 2,51E+08 |
| G1SFL7               | 6,17E+08 | 2,7E+09  | 2,09E+09 | 3,09E+09 | 3,56E+09 | 2,57E+09 |
| G1SFN1               | 6,03E+08 | 0        | 1,75E+08 | 2,11E+08 | 1,67E+08 | 2,13E+08 |
| Q28653;G1SFN5        | 0        | 2,19E+08 | 4,51E+08 | 0        | 0        | 0        |
| G1SFP0               | 2,86E+09 | 3,3E+09  | 2,81E+09 | 2,03E+09 | 2,44E+09 | 1,56E+09 |
| G1SFQ1;U3KNE1        | 9,49E+08 | 1,18E+09 | 1,27E+09 | 9,4E+08  | 8,12E+08 | 9,33E+08 |
| G1SFQ2               | 0        | 0        | 0        | 69282000 | 62258000 | 60453000 |
| G1SFQ3               | 1,3E+09  | 4,21E+08 | 4,9E+08  | 7,68E+08 | 8,43E+08 | 7,09E+08 |
| G1SFQ9               | 0        | 0        | 0        | 0        | 6526800  | 0        |
| G1SFR8               | 1,26E+10 | 5,19E+10 | 6,49E+10 | 7,23E+09 | 1,14E+10 | 1,21E+10 |
| G1SFS8               | 4,08E+09 | 1,39E+10 | 1,63E+10 | 6,79E+09 | 5,78E+09 | 5,48E+09 |
| G1SFT2               | 1,82E+08 | 8,02E+08 | 5,46E+08 | 6,33E+08 | 1,2E+09  | 1,22E+09 |
| G1SFU0;O97572;U3KLX2 | 2,35E+10 | 5,99E+09 | 7,24E+09 | 1,16E+10 | 9,97E+09 | 7,13E+09 |
| G1SFU4               | 2,4E+09  | 1,05E+09 | 8,67E+08 | 3,94E+09 | 3,42E+09 | 3,97E+09 |
| G1SFV1               | 6,7E+10  | 3,37E+10 | 2,92E+10 | 5,74E+10 | 5,92E+10 | 7,8E+10  |
| G1SFV7               | 8,84E+09 | 1,89E+10 | 2,1E+10  | 3,98E+10 | 3,32E+10 | 3,37E+10 |
| G1SFV8;G1U6M2        | 0        | 0        | 3,32E+08 | 2,08E+09 | 1,57E+09 | 5,84E+08 |
| G1SFW9               | 2,25E+09 | 7,08E+08 | 7,56E+08 | 8,46E+08 | 1,3E+09  | 1,21E+09 |
| G1SFX0               | 1,02E+09 | 1,14E+08 | 1,22E+08 | 60468000 | 2,29E+08 | 2,33E+08 |
| G1SFX7               | 6,92E+08 | 1,46E+09 | 1,47E+09 | 0        | 0        | 0        |
| G1SFZ1;G1SWZ9        | 1,05E+09 | 3,54E+09 | 5,7E+09  | 7,34E+08 | 8,26E+08 | 7,12E+08 |
| G1SFZ2               | 1,86E+09 | 2,66E+08 | 3,04E+08 | 8,08E+08 | 6,05E+08 | 3,97E+08 |
| G1SFZ8;B8K197        | 1,58E+09 | 3,52E+09 | 4,08E+09 | 1,14E+09 | 1,58E+09 | 1,43E+09 |
| G1SG06               | 7,39E+09 | 2,36E+09 | 1,88E+09 | 8,29E+09 | 8,28E+09 | 9,94E+09 |
| G1SG11               | 3,7E+10  | 4,34E+09 | 4,5E+09  | 3,41E+10 | 3,1E+10  | 4,43E+10 |
| G1SG14               | 0        | 0        | 0        | 0        | 1,53E+08 | 0        |
| G1SG16               | 0        | 0        | 1,9E+08  | 0        | 0        | 0        |
| G1SG29               | 1,47E+09 | 6,65E+09 | 8,88E+09 | 2,63E+09 | 3,13E+09 | 3,17E+09 |
| G1TQC3;G1SG30        | 1,42E+09 | 1,97E+08 | 1,85E+08 | 2,29E+08 | 2,28E+08 | 2,04E+08 |
| G1SG31               | 2,52E+09 | 9,44E+08 | 7,96E+08 | 2,81E+09 | 2,81E+09 | 2,34E+09 |
| G1SG35               | 0        | 0        | 4,54E+08 | 0        | 0        | 0        |
| U3KP61;G1SG37        | 4,3E+08  | 2,27E+08 | 2,17E+08 | 1,11E+09 | 1,48E+09 | 1,41E+09 |
| G1SG41               | 1,76E+09 | 8,07E+08 | 7,28E+08 | 3,33E+09 | 2,15E+09 | 1,18E+09 |
| G1SG42;G1THG4        | 2,64E+08 | 5,99E+08 | 7,58E+08 | 1,43E+09 | 1,57E+09 | 2,08E+09 |
| G1SG44               | 2,48E+09 | 5,07E+08 | 6,34E+08 | 2,53E+09 | 1,28E+09 | 1,75E+09 |
| G1SG47               | 77754000 | 0        | 0        | 0        | 0        | 0        |
| G1SG55               | 9,82E+09 | 1,07E+10 | 9,7E+09  | 1,95E+10 | 1,99E+10 | 1,89E+10 |
| G1SUR2;G1SG59        | 0        | 1,95E+08 | 1,54E+08 | 0        | 0        | 0        |
| G1SG61               | 0        | 0        | 0        | 0        | 0        | 0        |
| G1SG63               | 2,65E+09 | 0        | 1,26E+09 | 7,38E+08 | 1,39E+09 | 6,44E+08 |
| G1SG68               | 3,86E+08 | 8,12E+08 | 9,62E+08 | 1,57E+08 | 3,04E+08 | 3,5E+08  |
| G1SG72               | 5,62E+08 | 2,21E+09 | 3,44E+09 | 7,16E+08 | 3,71E+08 | 3,66E+08 |
| G1SG80               | 2,29E+10 | 1,16E+10 | 1,08E+10 | 1,64E+10 | 2,06E+10 | 2,59E+10 |

|                      |          |          |          |          |          |          |
|----------------------|----------|----------|----------|----------|----------|----------|
| G1SGA5               | 1,78E+09 | 5,1E+09  | 4,27E+09 | 5,79E+08 | 7,93E+08 | 6,14E+08 |
| G1SGB5               | 3,08E+10 | 1,61E+10 | 1,69E+10 | 5,23E+10 | 6,21E+10 | 6,36E+10 |
| G1SGB7;U3KND8        | 8,82E+08 | 3,17E+08 | 4,91E+08 | 3,98E+08 | 0        | 0        |
| G1SGC2;G1SUJ3;O62695 | 1,08E+09 | 8,11E+08 | 7,83E+08 | 9,85E+08 | 1,18E+09 | 1,08E+09 |
| G1SGC3               | 1,55E+08 | 1,04E+08 | 1,31E+08 | 0        | 0        | 0        |
| G1SGD7               | 0        | 0        | 0        | 2,36E+08 | 1,49E+08 | 0        |
| G1SGE5               | 1,34E+09 | 5,66E+08 | 4,69E+08 | 1,13E+09 | 9,21E+08 | 9,28E+08 |
| G1SGF7               | 0        | 0        | 0        | 1,16E+08 | 69138000 | 1,2E+08  |
| G1SGG2               | 1,5E+08  | 2,17E+08 | 1,85E+08 | 0        | 0        | 1,2E+08  |
| G1SGG6               | 7,76E+09 | 2,35E+09 | 2,09E+09 | 5,76E+09 | 4,89E+09 | 3,21E+09 |
| G1SGH2               | 3,3E+09  | 7,3E+08  | 9,1E+08  | 2,17E+09 | 1,79E+09 | 1,49E+09 |
| G1SGH3               | 1,56E+08 | 1,58E+08 | 1,38E+08 | 58544000 | 0        | 0        |
| G1SGI3;U3KPKQ1       | 4,14E+08 | 0        | 0        | 0        | 0        | 0        |
| G1SGI8               | 8,02E+09 | 3,97E+09 | 3,87E+09 | 6,29E+09 | 6,51E+09 | 1,02E+10 |
| G1SGJ7               | 0        | 0        | 0        | 0        | 0        | 87060000 |
| G1SGK1               | 0        | 3,01E+08 | 2,73E+08 | 0        | 0        | 3,48E+08 |
| G1SGK6               | 3,31E+08 | 0        | 0        | 1,46E+08 | 2,23E+08 | 1,29E+08 |
| G1SGL0               | 3,64E+08 | 0        | 2,66E+08 | 7,43E+08 | 7,59E+08 | 5,8E+08  |
| G1U830;G1U6I8;G1SGL3 | 1,9E+08  | 1,78E+09 | 1,82E+09 | 3,3E+09  | 1,28E+09 | 4,46E+09 |
| G1SGL4               | 9,09E+08 | 1,84E+08 | 0        | 2,43E+08 | 1,69E+08 | 0        |
| G1SGM2               | 3,28E+08 | 3,38E+08 | 6,87E+08 | 5,1E+08  | 3,74E+08 | 5E+08    |
| G1SGM3               | 9,69E+09 | 2,34E+09 | 2,67E+09 | 3,14E+10 | 2,09E+10 | 3,07E+10 |
| G1SGN5               | 5,99E+08 | 4,33E+08 | 4,38E+08 | 1,01E+09 | 8,02E+08 | 8,48E+08 |
| G1SGN6               | 5,51E+08 | 5,2E+08  | 4,38E+08 | 8,65E+08 | 1,4E+09  | 1,42E+09 |
| G1SGP1               | 9,8E+10  | 2,01E+10 | 1,81E+10 | 4,6E+10  | 5,14E+10 | 7,14E+10 |
| G1SGP4               | 0        | 0        | 0        | 1,19E+08 | 0        | 0        |
| G1SGQ0               | 8,68E+09 | 2,01E+09 | 1,95E+09 | 5,3E+09  | 5,32E+09 | 6,94E+09 |
| G1SGQ1               | 76257000 | 0        | 0        | 0        | 0        | 0        |
| G1SGQ6               | 1,54E+08 | 3,68E+08 | 1,86E+08 | 0        | 0        | 0        |
| G1SGR8;G1U1E9        | 1,4E+08  | 3,6E+08  | 4,77E+08 | 2,36E+08 | 2,6E+08  | 2,93E+08 |
| G1SGR9;G1TWZ7        | 4,62E+08 | 6,56E+08 | 1,09E+09 | 2,13E+09 | 2,38E+09 | 2,08E+09 |
| G1SGS2               | 2,81E+08 | 1,88E+08 | 4,26E+08 | 1,15E+10 | 4,69E+09 | 3,52E+09 |
| G1SGS7               | 1,6E+09  | 2,51E+09 | 1,87E+09 | 9,13E+09 | 8,25E+09 | 7,16E+09 |
| G1SGV5               | 6,77E+08 | 3,95E+09 | 5,46E+09 | 1,05E+09 | 5,89E+08 | 4,8E+08  |
| G1SGX2               | 1,73E+09 | 6,71E+08 | 4E+08    | 4,6E+08  | 6,37E+08 | 4,18E+08 |
| G1SGX4               | 2,83E+09 | 8,21E+09 | 9,03E+09 | 3,23E+09 | 2,59E+09 | 1,98E+09 |
| G1SGX5               | 4,39E+08 | 0        | 0        | 1,92E+08 | 2,32E+08 | 2,44E+08 |
| G1SGY0               | 5,26E+08 | 6,96E+08 | 5,98E+08 | 4,51E+08 | 3,82E+08 | 3,63E+08 |
| G1SGY8               | 1,89E+10 | 3,82E+09 | 5E+09    | 6,81E+09 | 8,19E+09 | 6,36E+09 |
| G1SGZ2               | 32366000 | 1,64E+08 | 0        | 18360000 | 19733000 | 18609000 |
| P00489;G1SGZ6;U3KMU3 | 0        | 1,63E+08 | 1,02E+08 | 97005000 | 1,09E+08 | 0        |
| G1SGZ7               | 8,06E+08 | 3,52E+08 | 1,96E+08 | 1,4E+08  | 0        | 1,69E+08 |
| G1SH00               | 5,61E+09 | 1,82E+09 | 1,73E+09 | 1,46E+09 | 1,46E+09 | 1,65E+09 |
| G1SH05               | 6,71E+10 | 3,66E+11 | 3,46E+11 | 7,39E+10 | 8,4E+10  | 1,02E+11 |
| G1SH08               | 0        | 0        | 0        | 2,95E+08 | 2,1E+08  | 1,89E+08 |
| G1SH10               | 3,79E+09 | 1,48E+09 | 1,46E+09 | 2,45E+09 | 1,37E+09 | 1,22E+09 |
| G1SH18               | 0        | 2,12E+08 | 0        | 0        | 0        | 0        |
| G1SH25               | 1,12E+09 | 5,81E+08 | 7,74E+08 | 5,01E+08 | 6,4E+08  | 3,38E+08 |
| G1SH26               | 1,53E+09 | 4,06E+09 | 3,48E+09 | 1,12E+09 | 1,88E+09 | 1,5E+09  |
| G1SH27               | 1,16E+08 | 0        | 0        | 0        | 0        | 0        |

|                        |          |          |          |          |          |          |
|------------------------|----------|----------|----------|----------|----------|----------|
| G1SH44                 | 0        | 0        | 0        | 8,24E+08 | 8,89E+08 | 1,09E+09 |
| G1SH63                 | 2,71E+08 | 1,77E+09 | 1,67E+09 | 4,16E+08 | 5,98E+08 | 3,78E+08 |
| G1SH66                 | 3,52E+09 | 2,05E+10 | 2,64E+10 | 3,96E+09 | 5,66E+09 | 7,35E+09 |
| G1SH73                 | 0        | 0        | 0        | 0        | 0        | 1,61E+08 |
| G1SH78                 | 3,94E+09 | 7,19E+08 | 5,83E+08 | 4,19E+09 | 4,87E+09 | 3,54E+09 |
| G1SH80                 | 2,21E+09 | 4,71E+08 | 3,02E+08 | 9,15E+08 | 5,86E+08 | 8,38E+08 |
| G1SH81                 | 2,86E+09 | 4,88E+09 | 5,93E+09 | 2,18E+08 | 3,36E+08 | 3,41E+08 |
| G1SH86                 | 1,43E+08 | 9,22E+08 | 4,27E+08 | 0        | 0        | 1,27E+08 |
| G1SH88                 | 2,8E+08  | 4,47E+09 | 4,12E+09 | 1,57E+08 | 2,13E+08 | 2,15E+08 |
| G1SH95                 | 6,81E+08 | 1,08E+09 | 1,07E+09 | 0        | 0        | 0        |
| G1SHB9;G1SS57          | 7,48E+08 | 5,49E+09 | 5,62E+09 | 9,12E+08 | 1E+09    | 1,34E+09 |
| G1SHC5;G1TPV2          | 1,15E+09 | 3,41E+08 | 3,46E+08 | 1,29E+09 | 8,41E+08 | 1,98E+09 |
| O02818-2;O02818;G1SHC9 | 0        | 0        | 0        | 1,56E+08 | 0        | 0        |
| G1SHD6;G1TC46          | 7,5E+08  | 3,58E+09 | 3,69E+09 | 7,27E+08 | 7,5E+08  | 6,22E+08 |
| G1SHE2                 | 1,13E+09 | 9,45E+08 | 0        | 3,75E+09 | 2,43E+09 | 1,83E+09 |
| G1SHE6                 | 1,19E+09 | 4,02E+08 | 4,28E+08 | 2,62E+09 | 3,83E+09 | 3,24E+09 |
| G1SHF0                 | 0        | 54479000 | 1,21E+08 | 0        | 0        | 0        |
| G1SHF1                 | 6,24E+08 | 4,67E+09 | 5,36E+09 | 1,19E+09 | 1,39E+09 | 1,06E+09 |
| G1SHF3                 | 8,64E+08 | 1,4E+09  | 1,2E+09  | 8,33E+08 | 8,95E+08 | 7,75E+08 |
| G1SHF6                 | 0        | 0        | 0        | 1,78E+08 | 0        | 0        |
| G1SHF7                 | 1,4E+08  | 2,8E+08  | 1,91E+08 | 1,28E+08 | 1,08E+08 | 0        |
| G1SHF9                 | 1,62E+08 | 1,14E+09 | 7,41E+08 | 3,34E+08 | 2,32E+08 | 2,11E+08 |
| G1SHG0;G1TS06;G1TM17   | 3,66E+09 | 1,5E+10  | 1,56E+10 | 5,35E+09 | 6,03E+09 | 6,54E+09 |
| G1SHG5                 | 50033000 | 0        | 0        | 0        | 0        | 0        |
| G1SHI0                 | 2,72E+09 | 7,31E+08 | 5,76E+08 | 2,15E+09 | 2,19E+09 | 1,97E+09 |
| G1SHI3                 | 1,17E+08 | 2,69E+08 | 3,02E+08 | 1,47E+08 | 85882000 | 1,61E+08 |
| G1SHI9                 | 4,27E+10 | 1,15E+10 | 1,19E+10 | 1,81E+10 | 1,48E+10 | 1,5E+10  |
| G1SHJ3                 | 2,33E+08 | 0        | 0        | 1,31E+08 | 75254000 | 1,11E+08 |
| G1SHK6                 | 9,2E+09  | 5,08E+09 | 4,47E+09 | 3,06E+10 | 2,31E+10 | 2,35E+10 |
| G1SHK7                 | 2,14E+09 | 1,13E+09 | 1,18E+09 | 3,55E+09 | 4,75E+09 | 5,24E+09 |
| G1SHK8;G1TBD6          | 7,09E+10 | 2,01E+10 | 1,59E+10 | 5,95E+10 | 5,71E+10 | 6,87E+10 |
| G1SHL0                 | 1,09E+09 | 7,17E+08 | 1,03E+09 | 1E+09    | 1,24E+09 | 1,32E+09 |
| G1SHL2                 | 3,33E+08 | 2,73E+08 | 3,75E+08 | 1,13E+09 | 1,44E+09 | 2,05E+09 |
| U3KN03;G1SHL8          | 0        | 3,92E+08 | 3,13E+08 | 52503000 | 70725000 | 1,07E+08 |
| G1SHL9                 | 5,1E+09  | 1,62E+09 | 1,4E+09  | 3,7E+09  | 3,8E+09  | 4,38E+09 |
| G1SHM1;G1TNF5;G1TTY1   | 1,84E+09 | 4,09E+09 | 4,46E+09 | 2,59E+09 | 3,81E+09 | 3,92E+09 |
| G1SHM2                 | 5,74E+08 | 2E+08    | 1,72E+08 | 4,08E+08 | 2,4E+08  | 1,7E+08  |
| G1SHQ1                 | 0        | 0        | 0        | 1,36E+08 | 0        | 0        |
| G1SHQ2;G1U567;G1TJF3   | 4,76E+09 | 2,7E+10  | 2,54E+10 | 7,69E+09 | 8,37E+09 | 6,85E+09 |
| U3KLZ8;G1SHR5          | 0        | 0        | 0        | 2,23E+08 | 0        | 0        |
| O97554;G1SHR6          | 2,43E+08 | 92479000 | 0        | 0        | 0        | 0        |
| G1SHS0                 | 60067000 | 0        | 0        | 0        | 0        | 0        |
| G1SHS7                 | 1,26E+10 | 5,7E+10  | 6,1E+10  | 8,28E+09 | 9,67E+09 | 7,83E+09 |
| G1SHS8                 | 0        | 5,61E+08 | 5,96E+08 | 0        | 1,76E+08 | 1,25E+08 |
| G1SHS9                 | 2E+08    | 0        | 0        | 0        | 1,41E+08 | 2,1E+08  |
| G1SHT2;G1TS13          | 1,86E+10 | 5,18E+09 | 4,02E+09 | 1,24E+10 | 1,55E+10 | 1,47E+10 |
| G1SHT5                 | 2,42E+08 | 1,71E+08 | 0        | 0        | 0        | 0        |
| G1SHU3                 | 0        | 1,91E+08 | 0        | 2,39E+08 | 5,65E+08 | 2,29E+08 |
| G1SHU5                 | 1,77E+08 | 7,3E+08  | 8,39E+08 | 0        | 0        | 0        |
| G1U437;G1SHU8;G1TUN8   | 5,79E+09 | 2,24E+10 | 2,06E+10 | 7,12E+09 | 6,62E+09 | 5,71E+09 |

|                      |          |          |          |          |          |          |
|----------------------|----------|----------|----------|----------|----------|----------|
| G1SHV1               | 2,71E+08 | 3,67E+08 | 3,6E+08  | 2,21E+08 | 2,06E+08 | 2,31E+08 |
| G1SHV9               | 1,72E+09 | 1,82E+09 | 1,68E+09 | 8,36E+08 | 6,41E+08 | 5,06E+08 |
| G1SHW6               | 54667000 | 0        | 0        | 0        | 0        | 0        |
| G1SHX1               | 1,43E+09 | 5,61E+09 | 6,17E+09 | 5,14E+08 | 4,9E+08  | 5,02E+08 |
| G1U660;G1SHY4        | 1,91E+09 | 1,05E+09 | 7,18E+08 | 5,54E+08 | 7,5E+08  | 8,97E+08 |
| G1SHZ8               | 1,38E+10 | 4,52E+10 | 4,96E+10 | 8,53E+09 | 7,25E+09 | 7,07E+09 |
| G1SI19               | 5,2E+08  | 9,3E+08  | 8,69E+08 | 5,04E+08 | 4,68E+08 | 8,07E+08 |
| G1SI20               | 4,16E+09 | 1,38E+10 | 1,39E+10 | 4,63E+09 | 5,99E+09 | 5,57E+09 |
| G1SI22               | 2,81E+09 | 1,74E+10 | 1,53E+10 | 5,47E+08 | 4,9E+08  | 7,59E+08 |
| G1SI26               | 2,4E+09  | 7,99E+08 | 7,77E+08 | 1,2E+09  | 1,31E+09 | 1,9E+09  |
| G1SI29               | 7,89E+10 | 2,33E+10 | 2,22E+10 | 2,47E+10 | 3E+10    | 3,08E+10 |
| G1SI31               | 1,76E+09 | 6,15E+08 | 7,47E+08 | 5,84E+09 | 7,59E+09 | 8,58E+09 |
| G1SI36               | 0        | 0        | 45131000 | 0        | 0        | 0        |
| G1SI37               | 4,48E+10 | 9,06E+09 | 1,11E+10 | 2,2E+10  | 1,52E+10 | 1,82E+10 |
| G1SI41;G1U2G6        | 0        | 0        | 3,59E+08 | 0        | 0        | 0        |
| G1SI54               | 5,97E+08 | 6,1E+08  | 5,79E+08 | 9,65E+08 | 5,85E+08 | 4,25E+08 |
| G1SI58               | 1,48E+08 | 2,17E+08 | 0        | 1,62E+08 | 2,03E+08 | 0        |
| G1SI62               | 1,84E+08 | 1,24E+08 | 1,84E+08 | 0        | 0        | 0        |
| G1SI68               | 2,17E+08 | 0        | 0        | 2,97E+08 | 3E+08    | 4,5E+08  |
| G1SI71;U3KMZ1        | 3,78E+08 | 1,02E+09 | 5,01E+08 | 0        | 1,69E+08 | 0        |
| G1SI74               | 1,32E+08 | 0        | 0        | 0        | 0        | 0        |
| G1SI76               | 1,29E+09 | 3,01E+08 | 1,85E+08 | 7,72E+08 | 1,11E+09 | 7,84E+08 |
| G1SI83               | 2,1E+09  | 5,21E+09 | 4,13E+09 | 3,44E+09 | 5,63E+09 | 4,22E+09 |
| G1SI85               | 8,59E+09 | 1,57E+09 | 1,54E+09 | 4,33E+09 | 3,78E+09 | 3,29E+09 |
| G1TZR3;G1SI89        | 7,11E+08 | 4,03E+08 | 3,36E+08 | 1,59E+09 | 1,57E+09 | 1,55E+09 |
| G1SI95               | 5,49E+08 | 2,62E+08 | 2,11E+08 | 4,11E+08 | 4,83E+08 | 4,59E+08 |
| G1SIB0               | 5,75E+09 | 2E+09    | 1,99E+09 | 1,2E+10  | 1,03E+10 | 1,19E+10 |
| G1SIB1               | 0        | 1,32E+08 | 1,74E+08 | 0        | 0        | 1,32E+08 |
| G1SIB2               | 2,03E+10 | 5,82E+09 | 6,5E+09  | 3,56E+09 | 3,53E+09 | 3,76E+09 |
| G1SIB6               | 1,89E+09 | 1,15E+10 | 1,09E+10 | 8,42E+08 | 9,76E+08 | 1,18E+09 |
| G1SIB9               | 6,35E+08 | 2,37E+09 | 2,23E+09 | 1,64E+09 | 1,61E+09 | 7,32E+08 |
| G1SIC4;U3KND5        | 1,69E+09 | 1,79E+08 | 4,1E+08  | 7,72E+09 | 4,06E+09 | 4,36E+09 |
| G1SIC7               | 0        | 0        | 69974000 | 0        | 0        | 0        |
| G1SIE2               | 1,74E+08 | 0        | 0        | 0        | 0        | 0        |
| G1SIE6               | 4,79E+09 | 1,68E+09 | 1,43E+09 | 3,91E+09 | 4,56E+09 | 3,66E+09 |
| G1SIE8               | 7,26E+08 | 1,26E+09 | 7,26E+08 | 0        | 0        | 1,4E+08  |
| G1SIF2;G1TEQ1        | 2,78E+10 | 7,75E+09 | 8,29E+09 | 7,5E+09  | 6,28E+09 | 7,44E+09 |
| G1SIG2               | 0        | 1,58E+09 | 1,73E+09 | 4,41E+08 | 7,13E+08 | 7,71E+08 |
| G1SIH0;G1STP1;B6A7Q3 | 4,53E+08 | 4,56E+09 | 3,4E+09  | 2,72E+08 | 2,56E+08 | 2,71E+08 |
| G1SIH1;G1TIQ5        | 6,17E+08 | 2,42E+09 | 2,22E+09 | 7,62E+08 | 7,08E+08 | 7,03E+08 |
| G1SIH3;G1TJP1        | 0        | 0        | 2,43E+08 | 0        | 0        | 0        |
| G1SIJ0;G1SIJ6        | 5,45E+08 | 2,94E+08 | 1,16E+08 | 1,42E+08 | 1,41E+08 | 1,37E+08 |
| G1SIJ1;G1TN01        | 79933000 | 0        | 0        | 0        | 0        | 0        |
| G1SIJ2               | 6,5E+10  | 2,16E+10 | 1,79E+10 | 3,72E+10 | 4,5E+10  | 5,05E+10 |
| G1SIJ7               | 1,55E+10 | 4,2E+09  | 3,26E+09 | 1,66E+09 | 8,63E+08 | 8,21E+08 |
| G1SIJ8               | 0        | 2,51E+08 | 2,86E+08 | 0        | 0        | 0        |
| G1SIK2               | 0        | 0        | 16714000 | 0        | 0        | 0        |
| G1SIK4               | 5,72E+08 | 1,12E+08 | 1,66E+08 | 4,28E+08 | 1,77E+08 | 1,36E+08 |
| G1SIL1               | 1,42E+08 | 2,72E+08 | 4,07E+08 | 0        | 0        | 0        |
| G1SIL2               | 9,41E+08 | 2,94E+08 | 3,37E+08 | 2,65E+08 | 0        | 0        |

|                      |          |          |          |          |          |          |
|----------------------|----------|----------|----------|----------|----------|----------|
| G1SIL8               | 0        | 7,21E+08 | 4,81E+08 | 0        | 1,67E+08 | 0        |
| G1SIM3;U3KP10        | 1,07E+10 | 2,12E+09 | 2,04E+09 | 6,69E+09 | 5,45E+09 | 4,75E+09 |
| G1SIN2               | 0        | 2,12E+08 | 1,87E+08 | 0        | 0        | 0        |
| G1SIN4;G1SUC6        | 0        | 2,32E+08 | 2,94E+08 | 3,75E+08 | 0        | 0        |
| G1SIN7               | 0        | 2,72E+08 | 2,82E+08 | 0        | 0        | 0        |
| G1SIP1               | 4,04E+09 | 4,34E+08 | 2,06E+08 | 2,72E+09 | 2,17E+09 | 3,17E+09 |
| G1SIP2               | 1,45E+10 | 4,64E+09 | 4,77E+09 | 7,22E+09 | 9,01E+09 | 8,9E+09  |
| G1SIP6               | 5,74E+09 | 2,19E+09 | 1,69E+09 | 3,43E+10 | 3,52E+10 | 3,83E+10 |
| G1SIP9               | 2,89E+09 | 8,55E+08 | 9,4E+08  | 8,84E+08 | 1,18E+09 | 1,08E+09 |
| G1SIQ9               | 1,12E+09 | 4,73E+08 | 5,19E+08 | 0        | 1,9E+08  | 0        |
| G1SIS2               | 1,38E+09 | 2,44E+08 | 3,58E+08 | 1,2E+09  | 6,3E+08  | 5,64E+08 |
| G1SIT0               | 4,43E+08 | 3,22E+08 | 1,88E+08 | 4,33E+09 | 3,83E+09 | 4,82E+09 |
| G1SIT5;G1U5E6;G1U7X5 | 3,47E+09 | 1,4E+10  | 1,52E+10 | 7,31E+09 | 6,22E+09 | 6,19E+09 |
| G1SIT6               | 2,07E+08 | 0        | 0        | 0        | 0        | 0        |
| G1SIT9               | 4,81E+09 | 2,18E+10 | 2,03E+10 | 3,66E+09 | 5,8E+09  | 6,09E+09 |
| G1SIV3               | 1,69E+09 | 4,28E+08 | 4,76E+08 | 1,54E+09 | 1,48E+09 | 1,34E+09 |
| G1SIV7               | 5,1E+08  | 8,41E+08 | 9,79E+08 | 0        | 0        | 0        |
| G1SIV9               | 2,82E+08 | 1,12E+08 | 1,29E+08 | 3,15E+08 | 2,71E+08 | 1,18E+08 |
| G1SIW1;G1SGY7;G1SUA9 | 8,28E+08 | 1,26E+09 | 1,34E+09 | 1,1E+09  | 7,88E+08 | 7,44E+08 |
| G1SIW8               | 1,45E+09 | 1,17E+09 | 1,44E+09 | 5,74E+08 | 7,36E+08 | 5,39E+08 |
| G1SIX1               | 1,9E+08  | 5,92E+08 | 4,96E+08 | 1,79E+08 | 2,25E+08 | 1,95E+08 |
| G1SIX5               | 1,3E+08  | 0        | 0        | 0        | 0        | 0        |
| G1SIY9               | 5,45E+08 | 7,63E+08 | 0        | 4,05E+08 | 3,5E+08  | 7,4E+08  |
| G1SIZ2               | 3,57E+09 | 1,82E+10 | 1,73E+10 | 4,09E+09 | 4,66E+09 | 3,57E+09 |
| G1SIZ4               | 0        | 3,99E+08 | 0        | 0        | 0        | 0        |
| G1SJ10               | 6,73E+08 | 1,66E+08 | 9,79E+08 | 5,64E+09 | 2,22E+09 | 7,66E+09 |
| G1SJ20               | 1,04E+09 | 5,7E+08  | 1,15E+09 | 1,87E+09 | 1,7E+09  | 2,38E+09 |
| G1SJ23               | 3,67E+08 | 7,59E+08 | 1,42E+09 | 1E+09    | 8,4E+08  | 4,13E+08 |
| G1SJ30               | 5,28E+08 | 97523000 | 73767000 | 0        | 0        | 0        |
| U3KN72;G1SJ40        | 3,5E+08  | 0        | 0        | 1,04E+08 | 1,15E+08 | 1,02E+08 |
| G1SJ41               | 1,05E+09 | 1,6E+09  | 1,48E+09 | 6,28E+08 | 6,3E+08  | 5,07E+08 |
| G1SJ48;G1TG79        | 2,76E+08 | 0        | 0        | 0        | 4,34E+08 | 0        |
| G1SJ56               | 8,71E+09 | 2,71E+10 | 3,2E+10  | 5,57E+09 | 7,86E+09 | 8,89E+09 |
| G1SJ57               | 0        | 1,54E+09 | 6,9E+08  | 3,27E+08 | 3,26E+08 | 0        |
| G1SJ66;U3KNB8        | 1,97E+09 | 6,56E+08 | 6,61E+08 | 1,36E+09 | 1,63E+09 | 1E+09    |
| G1SJ77               | 5,57E+08 | 1,4E+09  | 4,38E+09 | 2,88E+08 | 6,86E+08 | 0        |
| G1SJ87               | 0        | 0        | 2,07E+08 | 0        | 0        | 0        |
| G1SJB4;G1TVH1;G1TI49 | 8,77E+09 | 4,82E+10 | 5,18E+10 | 1,41E+09 | 3,76E+09 | 1,71E+09 |
| G1SJB9               | 2,68E+09 | 1,06E+09 | 8,24E+08 | 4,16E+09 | 4,12E+09 | 5,98E+09 |
| G1SJC7               | 2,61E+08 | 1,7E+09  | 1,29E+09 | 2,11E+08 | 2,8E+08  | 2,81E+08 |
| G1SJF1               | 2,9E+08  | 2,44E+08 | 3,35E+08 | 1,19E+08 | 1,68E+08 | 1,41E+08 |
| G1SJF4               | 0        | 0        | 0        | 0        | 1,69E+08 | 0        |
| G1SJF5               | 0        | 2,5E+09  | 1,16E+09 | 2,99E+08 | 0        | 0        |
| G1SJG0               | 1,41E+09 | 4,86E+08 | 4,01E+08 | 2,32E+09 | 1,96E+09 | 2,01E+09 |
| G1SJH8               | 2,64E+08 | 2,22E+08 | 2,18E+08 | 5,53E+08 | 5,53E+08 | 7,31E+08 |
| G1SJI4               | 3,39E+08 | 5,97E+08 | 4,77E+08 | 9,86E+09 | 1,62E+10 | 7,67E+09 |
| G1SJI6               | 2,17E+09 | 7,52E+08 | 7,16E+08 | 7,59E+08 | 9,68E+08 | 1,25E+09 |
| G1SJI7               | 6,58E+08 | 0        | 0        | 2,14E+08 | 2,31E+08 | 0        |
| G1SJI8               | 3,02E+09 | 9,5E+08  | 1,17E+09 | 3,21E+09 | 3,91E+09 | 3,26E+09 |
| G1SJK0               | 1,04E+09 | 2,6E+08  | 3,16E+08 | 8,89E+08 | 9,88E+08 | 8,9E+08  |

|                       |          |          |          |          |          |          |
|-----------------------|----------|----------|----------|----------|----------|----------|
| G1SJK9                | 1,87E+09 | 4,96E+08 | 5,81E+08 | 5,05E+08 | 4,95E+08 | 5,5E+08  |
| G1U8V4;G1SJL0         | 3,55E+08 | 0        | 0        | 5,01E+08 | 3,42E+08 | 3,16E+08 |
| G1SJL6                | 6,91E+09 | 1,31E+09 | 8,5E+08  | 4,63E+09 | 3,12E+09 | 4,23E+09 |
| G1SJL9                | 3,61E+08 | 5,35E+08 | 7,18E+08 | 8,8E+08  | 9,26E+08 | 1,15E+09 |
| G1SJM6                | 2,41E+08 | 2,46E+08 | 2,21E+08 | 1,33E+09 | 1,07E+09 | 1,61E+09 |
| G1SJN4                | 1,49E+09 | 5,17E+09 | 5,56E+09 | 4E+09    | 3,87E+09 | 4,84E+09 |
| G1SJN5                | 8,88E+08 | 3,75E+08 | 3,78E+08 | 3,98E+08 | 3,21E+08 | 3,02E+08 |
| G1SJQ2                | 2,1E+10  | 7,01E+09 | 6,38E+09 | 4,77E+10 | 4,86E+10 | 5,32E+10 |
| G1U4I6;G1SJQ6         | 2,13E+08 | 0        | 0        | 0        | 0        | 0        |
| G1T7P3;G1TZV1;G1SN51  | 3,22E+08 | 0        | 0        | 0        | 0        | 0        |
| G1SJR2;G1SUG7         | 0        | 7,8E+08  | 6,59E+08 | 1,16E+09 | 1,73E+09 | 1,39E+09 |
| G1SJR4                | 3,47E+09 | 5,1E+08  | 5,11E+08 | 2,95E+09 | 2,85E+09 | 2,86E+09 |
| G1SSZ8;G1SJS1;G1SQE8  | 0        | 0        | 0        | 4,14E+08 | 4,52E+08 | 5,03E+08 |
| G1SIJ8                | 3,62E+08 | 0        | 0        | 0        | 0        | 0        |
| G1SIJV2;G1SVL9;G1U1H4 | 68622000 | 1,62E+08 | 1,06E+08 | 1,59E+08 | 94312000 | 98987000 |
| G1T6M4;G1SIJW7;G1U7T7 | 2,54E+09 | 2,08E+09 | 1,88E+09 | 4,03E+09 | 3,71E+09 | 3,92E+09 |
| G1SIJW8;U3KNR1        | 4,57E+08 | 1,12E+09 | 9,41E+08 | 1,43E+09 | 8,4E+08  | 9,59E+08 |
| G1SIJX2               | 2,01E+08 | 4,51E+08 | 6,78E+08 | 1,71E+08 | 2,57E+08 | 2,47E+08 |
| G1SIJX3;U3KMC6        | 4,66E+09 | 1,88E+09 | 1,33E+09 | 3,97E+09 | 4,99E+09 | 4,67E+09 |
| G1SIJY0               | 1,59E+09 | 4,09E+08 | 4,05E+08 | 4,49E+08 | 4,98E+08 | 2,24E+08 |
| G1SIJY1               | 0        | 86859000 | 2,01E+08 | 2,39E+08 | 1,35E+08 | 1,44E+08 |
| G1SIJY8               | 5,25E+08 | 9,4E+09  | 9,19E+09 | 1,88E+08 | 1,69E+08 | 1,91E+08 |
| G1SIJZ2;U3KN52        | 1,61E+08 | 87273000 | 0        | 0        | 0        | 0        |
| G1SIJZ4               | 5,37E+08 | 1,1E+09  | 1,29E+09 | 1,94E+08 | 2,57E+08 | 2,89E+08 |
| G1SIJZ8               | 2,01E+09 | 4,1E+08  | 3,38E+08 | 1,71E+09 | 2,06E+09 | 2,24E+09 |
| G1SIJZ9;P08628        | 2,76E+10 | 5,55E+10 | 6,23E+10 | 3,27E+09 | 3,83E+09 | 5,12E+09 |
| G1SK00;U3KN42;G1SQ76  | 2,94E+09 | 1,16E+10 | 1,24E+10 | 3,64E+09 | 4,68E+09 | 4,67E+09 |
| G1SK04                | 5,57E+08 | 3,94E+09 | 3,34E+09 | 3,47E+08 | 1,4E+09  | 3,89E+08 |
| G1U743;G1SK09         | 0        | 0        | 0        | 7,88E+08 | 0        | 0        |
| G1SK10                | 4,26E+08 | 4,14E+08 | 4,19E+08 | 6,03E+08 | 4,56E+08 | 5,3E+08  |
| G1SK16                | 2,11E+08 | 0        | 0        | 0        | 0        | 0        |
| G1SK17;G1U7M0         | 50231000 | 1,59E+08 | 1,24E+08 | 4,46E+08 | 2,26E+08 | 7,03E+08 |
| G1SK22;P62975;G1SF46  | 6,91E+09 | 1,39E+10 | 1,7E+10  | 1,23E+10 | 1,41E+10 | 1,16E+10 |
| G1SK25                | 4,55E+08 | 2,68E+08 | 3,13E+08 | 2,47E+08 | 1,39E+08 | 2,89E+08 |
| G1SK33                | 3,66E+10 | 1,01E+10 | 1,09E+10 | 1,64E+10 | 1,54E+10 | 1,88E+10 |
| G1SK48;P13019         | 1,71E+09 | 5,61E+09 | 5,74E+09 | 1,26E+09 | 1,46E+09 | 9,97E+08 |
| G1SK49                | 1,04E+09 | 1,75E+08 | 4,35E+08 | 1,13E+09 | 9,78E+08 | 9,43E+08 |
| G1SK52                | 1,94E+08 | 1,49E+09 | 1,41E+09 | 1,91E+08 | 2,12E+08 | 2,06E+08 |
| G1SK61;G1U234;G1T9Q8  | 2,8E+08  | 0        | 0        | 0        | 0        | 0        |
| G1SK67                | 1,9E+08  | 0        | 0        | 0        | 0        | 0        |
| G1SK72                | 2,38E+08 | 0        | 0        | 6,03E+08 | 0        | 0        |
| G1SK92                | 6,33E+08 | 1,59E+08 | 1,68E+08 | 2,02E+08 | 2,31E+08 | 0        |
| G1SKA3                | 2,25E+08 | 2,14E+08 | 1,5E+08  | 0        | 0        | 0        |
| G1SKD2                | 5,44E+08 | 0        | 0        | 0        | 0        | 0        |
| G1SKD5;G1SD38         | 1,55E+08 | 8,76E+08 | 7,03E+08 | 1,65E+08 | 1,82E+08 | 78553000 |
| G1SKD9                | 2,92E+10 | 8,13E+09 | 8,24E+09 | 1,89E+10 | 2,09E+10 | 2,12E+10 |
| G1SKE0                | 2,64E+08 | 1,21E+09 | 1,28E+09 | 3E+08    | 0        | 3,11E+08 |
| G1SKE2                | 1,78E+08 | 2,16E+08 | 2,4E+08  | 2,16E+08 | 2,04E+08 | 2,03E+08 |
| G1SKE5                | 4,05E+08 | 2,55E+08 | 1,86E+08 | 4,65E+08 | 4,63E+08 | 6,54E+08 |
| G1SKE7                | 3,73E+08 | 2,12E+08 | 1,37E+08 | 1,21E+09 | 1,41E+09 | 1,27E+09 |

|                      |          |          |          |          |          |          |
|----------------------|----------|----------|----------|----------|----------|----------|
| G1SKF0;G1TWH4;Q95KK4 | 8,17E+09 | 2,37E+09 | 2,5E+09  | 5,27E+09 | 5,75E+09 | 7,11E+09 |
| G1SKF1;G1SYF3        | 2,37E+09 | 8,91E+08 | 7,35E+08 | 1,7E+09  | 1,23E+09 | 1,18E+09 |
| G1SKF5               | 4,02E+08 | 1,8E+08  | 1,32E+08 | 2,08E+08 | 2,79E+08 | 2,6E+08  |
| G1SKF7;G1TG04;G1U1N5 | 7,32E+09 | 2,3E+10  | 2,24E+10 | 9,56E+09 | 6,72E+09 | 4,92E+09 |
| G1SKH2               | 0        | 4,68E+08 | 5,58E+08 | 65283000 | 81098000 | 1,1E+08  |
| G1SKH4               | 1,74E+08 | 0        | 74492000 | 0        | 1,29E+08 | 1,04E+08 |
| G1SKI1               | 6,72E+08 | 7,09E+09 | 5,22E+09 | 3,96E+08 | 2,93E+08 | 5,59E+08 |
| G1SKI8               | 5,4E+08  | 1,21E+08 | 83002000 | 0        | 0        | 0        |
| G1SKJ4               | 3,55E+09 | 7,56E+08 | 7,43E+08 | 1,46E+09 | 1,3E+09  | 1,29E+09 |
| G1SKJ5               | 5,01E+08 | 1,17E+09 | 8,96E+08 | 7,24E+08 | 6,69E+08 | 7,08E+08 |
| G1SKJ8               | 6,96E+08 | 7,16E+08 | 5,19E+08 | 1,69E+09 | 1,55E+09 | 1,94E+09 |
| G1SKK0               | 6,18E+08 | 5,75E+09 | 7,7E+09  | 5,83E+08 | 1,77E+08 | 3,49E+08 |
| G1SKK1               | 2,35E+09 | 8,28E+09 | 1,3E+10  | 3,61E+08 | 3,48E+08 | 3,27E+08 |
| G1SKK9               | 4,29E+08 | 3,81E+08 | 3,26E+08 | 2,04E+08 | 1,97E+08 | 2,15E+08 |
| G1SKL7               | 7,4E+09  | 3,99E+09 | 3,8E+09  | 1,46E+09 | 1,32E+09 | 7,46E+08 |
| G1SKM2;U3KME5;G1SUS5 | 1,39E+09 | 3,42E+08 | 3,94E+08 | 1,54E+09 | 7,53E+08 | 1,2E+09  |
| G1SKM5               | 73825000 | 6,64E+08 | 5,96E+08 | 2,2E+08  | 1,92E+08 | 1,77E+08 |
| G1SKN0               | 4,33E+10 | 9,79E+09 | 8,98E+09 | 3,01E+10 | 2,61E+10 | 2,55E+10 |
| G1SKN2               | 3,19E+10 | 5,25E+09 | 3,65E+09 | 4,12E+10 | 3,54E+10 | 3,63E+10 |
| G1SKN7               | 1,2E+09  | 5,18E+08 | 6,13E+08 | 5,25E+08 | 5,4E+08  | 5,7E+08  |
| G1SKP1               | 6,85E+08 | 3,62E+08 | 3,7E+08  | 1,54E+09 | 6,24E+08 | 5,13E+08 |
| G1SKP2;G1SV83        | 3,42E+09 | 8,16E+09 | 8,55E+09 | 2,03E+09 | 1,53E+09 | 6,05E+08 |
| G1SKR3               | 3,59E+08 | 0        | 0        | 4,72E+08 | 6,12E+08 | 6,89E+08 |
| G1SKR5               | 3,2E+08  | 0        | 0        | 0        | 0        | 0        |
| G1SKS0               | 4,77E+08 | 5,72E+08 | 5,42E+08 | 4,47E+08 | 5,04E+08 | 3,2E+08  |
| G1SKS8               | 6,83E+08 | 7,88E+09 | 7,95E+09 | 1,17E+09 | 1,43E+09 | 1,57E+09 |
| G1SKS9               | 3,45E+09 | 9,71E+09 | 1,05E+10 | 3,65E+08 | 4,74E+08 | 2,58E+08 |
| G1SKT1               | 7,18E+09 | 1,77E+09 | 1,83E+09 | 1,41E+10 | 1,3E+10  | 1,8E+10  |
| G1SKT3               | 1,33E+09 | 0        | 3,38E+08 | 5,37E+08 | 3,93E+08 | 3,63E+08 |
| G1SKT4               | 3,82E+11 | 7,49E+10 | 7,84E+10 | 2,97E+11 | 2,70E+11 | 2,32E+11 |
| G1SKT7               | 3,71E+08 | 1,14E+08 | 1,44E+08 | 7,56E+08 | 7,73E+08 | 4,85E+08 |
| G1SKU1               | 65387000 | 0        | 0        | 0        | 0        | 0        |
| G1SKW5               | 1,98E+09 | 2,75E+09 | 2,81E+09 | 8,9E+08  | 9,13E+08 | 1E+09    |
| G1SKY7               | 3,67E+09 | 3,15E+09 | 3,22E+09 | 3,16E+09 | 4,41E+09 | 4,81E+09 |
| G1SKZ2;G1TIG1        | 8,07E+08 | 4,19E+08 | 3,24E+08 | 9,06E+08 | 1,19E+09 | 8,93E+08 |
| G1SKZ3               | 1,14E+09 | 2,3E+10  | 2,35E+10 | 2,48E+08 | 5,41E+08 | 8,4E+08  |
| G1SKZ8;G1TY53;G1TSL0 | 6,17E+09 | 1,14E+10 | 1,22E+10 | 6,22E+09 | 5,09E+09 | 3,58E+09 |
| G1SL02               | 8,89E+09 | 8,76E+09 | 8,88E+09 | 4,05E+09 | 3,59E+09 | 3,04E+09 |
| G1SL03               | 6,46E+08 | 3,2E+09  | 4,34E+09 | 3,57E+08 | 2,69E+08 | 4,45E+08 |
| G1SL07               | 3,58E+09 | 2,41E+09 | 2,2E+09  | 9,78E+09 | 1,45E+10 | 1,52E+10 |
| G1SL14               | 7,32E+08 | 3,5E+08  | 5,47E+08 | 2,19E+10 | 2,05E+10 | 9,85E+09 |
| G1SL16               | 3,78E+09 | 3,69E+09 | 3,46E+09 | 3,63E+09 | 4,22E+09 | 5,2E+09  |
| G1SL22               | 0        | 2,02E+08 | 0        | 4,17E+08 | 2,72E+08 | 2,5E+08  |
| G1SL31               | 2,32E+08 | 0        | 0        | 0        | 0        | 0        |
| G1SL32               | 5,06E+08 | 1,4E+08  | 2,06E+08 | 2,06E+08 | 2,15E+08 | 2,22E+08 |
| G1SL38               | 3,91E+08 | 1,76E+09 | 1,37E+09 | 1,55E+08 | 3,35E+08 | 3,4E+08  |
| G1SL41               | 1,87E+09 | 7,84E+08 | 8,24E+08 | 5,41E+09 | 4,27E+09 | 4,01E+09 |
| G1SL42;G1TN54        | 7,84E+09 | 2,23E+09 | 2,07E+09 | 2,35E+09 | 2,66E+09 | 2,53E+09 |
| G1SL46               | 2,2E+08  | 1,71E+09 | 1,54E+09 | 4,78E+08 | 8,16E+08 | 6,18E+08 |
| G1SL51               | 6,76E+08 | 1,26E+09 | 1,45E+09 | 1,08E+09 | 1,39E+09 | 1,62E+09 |

|                      |          |          |          |          |          |          |
|----------------------|----------|----------|----------|----------|----------|----------|
| G1SL57;U3KN01        | 1,67E+09 | 4,52E+09 | 5,04E+09 | 7,78E+08 | 1,07E+09 | 8,07E+08 |
| G1SL60               | 6,04E+09 | 3,45E+09 | 4,54E+09 | 8,63E+09 | 6,99E+09 | 6,84E+09 |
| G1SL62               | 4,26E+10 | 1,91E+11 | 1,74E+11 | 1,26E+10 | 2,69E+10 | 2,35E+10 |
| G1SL68;P04461;G1TVQ7 | 2,06E+10 | 4,83E+10 | 5,82E+10 | 7,41E+09 | 6,08E+09 | 7,15E+09 |
| G1SL80               | 2,16E+08 | 1,92E+09 | 1,81E+09 | 54355000 | 1,52E+08 | 2,5E+08  |
| G1SL81               | 0        | 0        | 0        | 1,96E+08 | 0        | 0        |
| G1SL85               | 7,09E+09 | 2,4E+09  | 2,2E+09  | 3,53E+09 | 2,81E+09 | 3,37E+09 |
| G1SL95               | 78347000 | 1,44E+08 | 2,83E+08 | 77317000 | 1,08E+08 | 1,08E+08 |
| G1SL97;G1TLQ3        | 1,68E+08 | 0        | 0        | 1,74E+08 | 1,49E+08 | 1,28E+08 |
| G1SL98               | 1,96E+09 | 4,12E+08 | 5,4E+08  | 2,07E+09 | 1,09E+09 | 8,25E+08 |
| G1SLA2               | 0        | 0        | 0        | 46542000 | 0        | 0        |
| G1SLA3;P52786        | 1,31E+09 | 4,68E+08 | 3,02E+08 | 2,06E+09 | 2,1E+09  | 1,37E+09 |
| G1SLA4               | 0        | 55346000 | 0        | 0        | 0        | 0        |
| G1SLA5               | 1,65E+09 | 3,2E+08  | 3,02E+08 | 1,22E+09 | 8,81E+08 | 5,05E+08 |
| G1SLB2               | 4,3E+08  | 1,69E+08 | 0        | 0        | 0        | 0        |
| G1SLC0               | 2,41E+10 | 9,72E+09 | 8,54E+09 | 4,15E+10 | 4,56E+10 | 6,31E+10 |
| G1SLC2;U3KNL5        | 2,64E+09 | 9,06E+09 | 9,54E+09 | 4,01E+08 | 5,25E+08 | 6,18E+08 |
| G1SLC5               | 0        | 0        | 0        | 3,63E+08 | 3,12E+08 | 6,12E+08 |
| G1SLD1               | 4,12E+09 | 1,3E+09  | 1,19E+09 | 6,57E+09 | 8,53E+09 | 7,3E+09  |
| G1SLD5               | 5,29E+10 | 1,87E+10 | 1,6E+10  | 3,18E+10 | 2,92E+10 | 3,72E+10 |
| G1SLD6               | 1,94E+09 | 3,44E+09 | 3,67E+09 | 1,27E+09 | 7,73E+08 | 9,4E+08  |
| G1SLD7               | 3,37E+08 | 0        | 0        | 2,18E+08 | 0        | 0        |
| G1SLE1               | 1,02E+09 | 0        | 1,45E+08 | 2,96E+08 | 3,14E+08 | 3,95E+08 |
| G1SLE6               | 1E+09    | 1,97E+09 | 1,81E+09 | 1,84E+08 | 2,29E+08 | 2,67E+08 |
| G1SLF1;O19053        | 1,28E+09 | 6,27E+09 | 6,11E+09 | 3,1E+09  | 3,43E+09 | 3,45E+09 |
| G1SLF5               | 2,36E+08 | 1,59E+08 | 1,23E+08 | 1,52E+08 | 2,06E+08 | 4,53E+08 |
| G1SLF6               | 4,94E+08 | 7,6E+09  | 5,24E+09 | 1,71E+08 | 2,79E+08 | 2,21E+08 |
| G1SLF8;G1TVW9        | 0        | 0        | 0        | 33468000 | 0        | 0        |
| G1U4L4;G1SWZ6;G1SLG0 | 7,36E+08 | 3,08E+09 | 3,85E+09 | 1,07E+09 | 1,44E+09 | 1,59E+09 |
| G1SLG4               | 0        | 0        | 0        | 0        | 2,24E+08 | 0        |
| G1SLH7               | 0        | 0        | 3,61E+08 | 0        | 0        | 0        |
| G1SLI0               | 9,37E+09 | 1,63E+09 | 1,71E+09 | 1,04E+10 | 1,07E+10 | 1,36E+10 |
| P80405;G1SLI3        | 2,28E+08 | 2,07E+08 | 0        | 1,43E+08 | 0        | 1,87E+08 |
| G1SLI6               | 0        | 6,92E+08 | 1,12E+09 | 0        | 0        | 0        |
| G1SLI8               | 25930000 | 0        | 0        | 0        | 0        | 0        |
| G1SLI9               | 0        | 0        | 2,29E+08 | 0        | 0        | 0        |
| G1SLJ6               | 5,89E+08 | 0        | 0        | 6,79E+08 | 3,82E+08 | 3,74E+08 |
| G1SLJ8               | 5,35E+08 | 2,89E+08 | 2,55E+08 | 3,11E+08 | 2,75E+08 | 2,64E+08 |
| G1SLJ9               | 5,49E+08 | 1,79E+08 | 2,87E+08 | 9,17E+08 | 5,77E+08 | 3,61E+08 |
| G1SLK2;U3KN18;G1SDE4 | 8,16E+09 | 1,06E+10 | 1,03E+10 | 3,84E+09 | 3,85E+09 | 4,34E+09 |
| G1SLK4               | 3,97E+08 | 3,03E+08 | 2,59E+08 | 3,19E+08 | 0        | 0        |
| G1SLK6               | 90811000 | 1,09E+08 | 1E+08    | 1,29E+08 | 0        | 87956000 |
| G1SLL1;G1U8Y2        | 1,26E+09 | 3,88E+09 | 4,23E+09 | 2,51E+09 | 3,09E+09 | 2,83E+09 |
| G1SLL6               | 0        | 0        | 0        | 0        | 0        | 3,76E+08 |
| G1SLL8               | 1,42E+09 | 6,21E+08 | 5,14E+08 | 4,12E+08 | 6,97E+08 | 5,98E+08 |
| G1SLM0;G1TUR3;G1SIU2 | 1,01E+10 | 2,04E+10 | 2,52E+10 | 7,59E+09 | 8,04E+09 | 8,05E+09 |
| G1SLM1               | 1,72E+09 | 7,04E+09 | 7,91E+09 | 3,16E+08 | 4,78E+08 | 3,36E+08 |
| G1SLM2               | 3,54E+08 | 4,26E+08 | 3,55E+08 | 2,36E+08 | 3,54E+08 | 3,88E+08 |
| G1SLN3;U3KNQ1        | 2,23E+09 | 1,91E+08 | 4,36E+08 | 7,59E+08 | 5,13E+08 | 8,92E+08 |
| G1SLP3;G1TFE3;G1U223 | 1,34E+09 | 4,84E+08 | 5,79E+08 | 4E+08    | 3,9E+08  | 4,18E+08 |



|                      |          |          |          |          |          |          |
|----------------------|----------|----------|----------|----------|----------|----------|
| G1SLP7               | 5,85E+08 | 2,54E+08 | 0        | 3,82E+08 | 3,7E+08  | 4,72E+08 |
| U3KNP2;G1SLQ3        | 1,97E+10 | 5,05E+09 | 4,7E+09  | 5,72E+09 | 3,81E+09 | 3,45E+09 |
| G1SLQ4;G1SDC1        | 8,45E+08 | 1,18E+09 | 1,6E+09  | 2,24E+08 | 2,49E+08 | 4,79E+08 |
| G1SLR4               | 1,26E+08 | 89659000 | 1,35E+08 | 2,46E+08 | 5,1E+08  | 9,96E+08 |
| G1SLS1;G1TQ02        | 2,35E+09 | 3,03E+08 | 3,66E+08 | 7,52E+08 | 6,31E+08 | 8,83E+08 |
| G1SLS3               | 4,46E+08 | 3,29E+08 | 4,31E+08 | 1,77E+08 | 2,22E+08 | 0        |
| G1TMH2;G1SLS7;G1TNU8 | 2,07E+08 | 0        | 0        | 98782000 | 0        | 0        |
| G1SLS8               | 1,78E+09 | 6,06E+08 | 5,74E+08 | 1,86E+09 | 1,8E+09  | 1,41E+09 |
| G1U8D5;G1TSI6;G1SLT2 | 7,73E+08 | 2,48E+09 | 2,72E+09 | 2,99E+09 | 4,95E+09 | 5,14E+09 |
| G1SLT8               | 3,41E+09 | 1,9E+09  | 1,82E+09 | 2,11E+09 | 2,65E+09 | 3,63E+09 |
| G1SLV3               | 7,37E+08 | 2,33E+08 | 2,18E+08 | 2,2E+08  | 2,01E+08 | 1,53E+08 |
| G1SLW8               | 9,69E+08 | 4,41E+09 | 4,4E+09  | 2,35E+08 | 4,61E+08 | 3,75E+08 |
| G1SLX0;G1U1T8        | 5,51E+08 | 4,33E+09 | 4,94E+09 | 6,05E+08 | 7,34E+08 | 1,06E+09 |
| G1SLX9;U3KNQ3;U3KNM5 | 3,25E+08 | 5,65E+08 | 3,23E+08 | 6,01E+08 | 9,11E+08 | 8,49E+08 |
| G1SLY1;G1TJ20;G1TLY6 | 89596000 | 1,57E+08 | 2,01E+08 | 1,31E+08 | 1,13E+08 | 0        |
| G1SLY2               | 5,73E+08 | 6,13E+08 | 2,8E+08  | 1,02E+09 | 1,46E+09 | 1,64E+09 |
| G1SLY8               | 1,5E+08  | 2,42E+08 | 2,02E+08 | 1,94E+08 | 0        | 2,72E+08 |
| G1SLZ8               | 3,18E+08 | 4,55E+08 | 4,43E+08 | 0        | 0        | 0        |
| G1SM02               | 1,67E+08 | 0        | 0        | 0        | 0        | 0        |
| G1SM05               | 5,11E+09 | 2,77E+09 | 2,72E+09 | 5,23E+09 | 4,93E+09 | 5,24E+09 |
| G1SM08               | 1,2E+09  | 1,48E+08 | 71513000 | 1,48E+08 | 0        | 86273000 |
| G1STS2;G1SM13;G1TOA0 | 0        | 0        | 0        | 0        | 86160000 | 0        |
| G1SM15;G1TZT2        | 2,47E+09 | 2,69E+09 | 3,22E+09 | 1,8E+09  | 1,52E+09 | 9,2E+08  |
| G1SM23               | 0        | 0        | 3,71E+08 | 0        | 4,15E+08 | 0        |
| G1SM27               | 7,59E+09 | 2,66E+09 | 2,54E+09 | 1,88E+10 | 1,86E+10 | 2,48E+10 |
| G1SM28               | 0        | 0        | 0        | 1,35E+08 | 0        | 0        |
| G1SM43               | 1,75E+09 | 4,06E+08 | 3,59E+08 | 7,21E+08 | 4,15E+08 | 4,42E+08 |
| G1SM46               | 0        | 2,57E+08 | 2,41E+08 | 2,84E+08 | 4,56E+08 | 8,02E+08 |
| G1SM48               | 2,48E+08 | 3,36E+08 | 3,49E+08 | 2,6E+08  | 3,39E+08 | 3,97E+08 |
| G1SM50               | 1,25E+09 | 5,28E+08 | 5,35E+08 | 8,84E+08 | 9,89E+08 | 1,31E+09 |
| G1SM51;U3KME2        | 5,59E+09 | 7,38E+09 | 7,84E+09 | 2,54E+09 | 2,49E+09 | 2,73E+09 |
| G1SM52               | 2,29E+10 | 6,74E+09 | 6,77E+09 | 1,11E+10 | 1,06E+10 | 1,08E+10 |
| G1SM60;G1TW86        | 3,24E+08 | 2,01E+09 | 1,81E+09 | 3,67E+08 | 3,48E+08 | 0        |
| G1SM62;G1T2K1        | 3,58E+08 | 1,02E+09 | 1,13E+09 | 1,24E+09 | 1,51E+09 | 7,28E+08 |
| G1SM76               | 3,69E+08 | 1,05E+09 | 1,16E+09 | 1,36E+09 | 1,82E+09 | 1,99E+09 |
| G1SM77               | 5,67E+10 | 1,34E+10 | 1,29E+10 | 4,45E+10 | 3,92E+10 | 4,01E+10 |
| G1SM91               | 0        | 5,19E+08 | 4,88E+08 | 0        | 0        | 0        |
| Q28735;U3KMN2;G1SMA1 | 2,03E+10 | 5,3E+09  | 4,92E+09 | 4,37E+10 | 3,72E+10 | 3,71E+10 |
| G1SMA6;G1SUF9;G1T6Q6 | 0        | 1,82E+08 | 1,66E+08 | 0        | 0        | 3,07E+08 |
| U3KP00;G1SMA7        | 53175000 | 99418000 | 1,32E+08 | 0        | 0        | 0        |
| G1SMB1               | 2,73E+08 | 4,64E+08 | 6E+08    | 4,91E+08 | 5,77E+08 | 4,35E+08 |
| G1SMB3               | 1,8E+08  | 0        | 0        | 0        | 0        | 0        |
| G1SMB8               | 0        | 1,58E+08 | 2,26E+08 | 0        | 0        | 0        |
| G1SMC4               | 9,79E+08 | 6,92E+08 | 7,87E+08 | 1,94E+09 | 1,55E+09 | 2,07E+09 |
| G1SME4;G1U738        | 8,3E+09  | 4,48E+09 | 5,76E+09 | 5,28E+09 | 5,39E+09 | 6,63E+09 |
| G1SMG0               | 1,97E+09 | 3,64E+08 | 3,41E+08 | 2,49E+08 | 3,12E+08 | 0        |
| G1SMG1;G1TMF1        | 0        | 4,31E+08 | 4,21E+08 | 0        | 3,09E+08 | 0        |
| G1SMG5               | 2,23E+09 | 1,19E+10 | 1,27E+10 | 9,77E+08 | 1,81E+09 | 1,24E+09 |
| G1SMH9               | 0        | 0        | 0        | 4,71E+08 | 7,75E+08 | 1,13E+09 |
| G1SMI2               | 1,14E+10 | 2,18E+09 | 2,21E+09 | 2,31E+09 | 1,76E+09 | 1,47E+09 |

|                      |          |          |          |          |          |          |
|----------------------|----------|----------|----------|----------|----------|----------|
| G1SMI6               | 1,86E+10 | 1,08E+10 | 9,93E+09 | 2,44E+10 | 2,33E+10 | 3,49E+10 |
| G1SMI7               | 3,96E+09 | 4,66E+08 | 5,19E+08 | 1,54E+09 | 1,35E+09 | 9,25E+08 |
| G1SMJ0               | 3,82E+08 | 1,37E+08 | 2,13E+08 | 1,35E+08 | 0        | 83946000 |
| G1SMJ5               | 1,82E+08 | 1,03E+09 | 1,06E+09 | 1,84E+08 | 3,31E+08 | 2,41E+08 |
| G1SMK8               | 1,86E+08 | 1,34E+08 | 1,23E+08 | 0        | 0        | 0        |
| G1SMK9               | 3,1E+08  | 0        | 0        | 6,19E+08 | 1,09E+09 | 8,42E+08 |
| G1SML4               | 3,07E+09 | 3,25E+08 | 3,91E+08 | 9,39E+08 | 5,17E+08 | 2,96E+08 |
| G1SML5               | 1,43E+10 | 3,26E+09 | 3,17E+09 | 1,6E+10  | 1,28E+10 | 8,5E+09  |
| G1SML9;G1U9C0        | 3,98E+09 | 4,3E+09  | 4,46E+09 | 1,31E+09 | 1,76E+09 | 1,82E+09 |
| G1SMM1               | 0        | 9,27E+08 | 9,86E+08 | 0        | 0        | 0        |
| G1SMM5               | 4,86E+09 | 4,72E+09 | 4,34E+09 | 1,99E+09 | 2,61E+09 | 2,42E+09 |
| G1SMM7               | 7,34E+09 | 5,12E+09 | 4,09E+09 | 9,57E+09 | 7,76E+09 | 8,71E+09 |
| G1SMN2               | 0        | 0        | 0        | 0        | 0        | 17913000 |
| G1SMN3               | 1,43E+08 | 0        | 2,11E+08 | 2,92E+08 | 4,77E+08 | 5,49E+08 |
| G1SMN9               | 8,22E+08 | 3,51E+08 | 0        | 9,98E+08 | 1,05E+09 | 8,29E+08 |
| G1SMP3               | 3,01E+08 | 0        | 0        | 2,73E+08 | 2,74E+08 | 0        |
| G1SMP5               | 2,01E+09 | 7,32E+08 | 4,72E+08 | 1,05E+09 | 7,92E+08 | 9,46E+08 |
| G1SMP6;G1TSK5        | 36308000 | 1,4E+08  | 1,65E+08 | 0        | 0        | 0        |
| G1SMQ4               | 6,37E+08 | 3,46E+09 | 3,58E+09 | 3,05E+08 | 3,09E+08 | 2,58E+08 |
| G1SMQ9               | 0        | 3,69E+08 | 4,24E+08 | 2,33E+08 | 2,76E+08 | 3,47E+08 |
| G1SMR7;G1TBC3        | 6,64E+09 | 1,03E+10 | 1,09E+10 | 6,02E+09 | 6,21E+09 | 7,43E+09 |
| G1SMS2;G1SY79        | 0        | 4,79E+08 | 4,63E+08 | 4,02E+08 | 0        | 0        |
| G1SMS3               | 3,69E+09 | 3,19E+09 | 4,58E+09 | 1,24E+09 | 1,05E+09 | 1,02E+09 |
| G1SMT2               | 4,55E+08 | 3,46E+09 | 6,45E+09 | 4,23E+08 | 3,67E+08 | 1,04E+08 |
| G1SMT7               | 0        | 6,1E+08  | 6,59E+08 | 1,68E+08 | 1,89E+08 | 1,14E+08 |
| G1SMU4               | 4,52E+08 | 0        | 0        | 0        | 0        | 0        |
| G1SMU8               | 3,72E+08 | 1,04E+09 | 1,09E+09 | 0        | 3,33E+08 | 4,01E+08 |
| G1SMW5               | 0        | 0        | 0        | 0        | 19484000 | 0        |
| G1SMW8               | 5,19E+08 | 6,2E+08  | 5,69E+08 | 4,35E+08 | 3,82E+08 | 4,02E+08 |
| G1SMX4               | 25432000 | 0        | 0        | 0        | 0        | 0        |
| G1SMY1               | 9,95E+09 | 8,93E+09 | 1,04E+10 | 2,65E+10 | 2,91E+10 | 3,17E+10 |
| G1SMY4               | 8,3E+09  | 3,5E+09  | 3,51E+09 | 2,38E+09 | 1,26E+09 | 1,33E+09 |
| G1SMY6               | 3,5E+08  | 1,52E+09 | 1,59E+09 | 0        | 2,5E+08  | 0        |
| G1SMY7;G1U1W4        | 6,51E+08 | 3,78E+09 | 3,66E+09 | 6,45E+08 | 5,9E+08  | 6,59E+08 |
| G1SMZ5               | 3,72E+09 | 6,29E+09 | 7,09E+09 | 8,76E+08 | 7,9E+08  | 5,54E+08 |
| G1SMZ8               | 5,47E+09 | 1,25E+09 | 1,14E+09 | 3,31E+09 | 2,94E+09 | 3,58E+09 |
| G1SN05               | 0        | 8,6E+08  | 1,1E+09  | 1,19E+09 | 1,1E+09  | 1,04E+09 |
| G1SN06               | 1,86E+10 | 2,76E+09 | 4,13E+09 | 3,94E+09 | 2,42E+09 | 2,15E+09 |
| G1SN08               | 1,93E+08 | 6,3E+08  | 3,17E+08 | 2,15E+08 | 0        | 0        |
| G1SN09               | 0        | 4,21E+08 | 4,76E+08 | 0        | 0        | 0        |
| G1SN11;G1T7I5;G1SD01 | 7,91E+09 | 9,99E+09 | 1,15E+10 | 1,47E+10 | 1,25E+10 | 6,77E+09 |
| G1SN14;G1SWW2        | 8,53E+08 | 3,03E+09 | 2,62E+09 | 2,03E+09 | 1,59E+09 | 8,46E+08 |
| G1SN16               | 5,72E+08 | 1,44E+09 | 1,44E+09 | 4,55E+08 | 7,2E+08  | 7,65E+08 |
| G1SYB6;G1SN20        | 4,41E+08 | 1,51E+08 | 1,59E+08 | 2,42E+08 | 2E+08    | 1,64E+08 |
| G1SN21               | 0        | 1,02E+09 | 1,16E+09 | 0        | 0        | 0        |
| G1SN22               | 0        | 2,23E+08 | 2,16E+08 | 0        | 0        | 1,43E+08 |
| G1SN26               | 0        | 0        | 95339000 | 0        | 0        | 0        |
| G1SN37               | 1,23E+09 | 9,51E+08 | 9,33E+08 | 1,58E+09 | 1,61E+09 | 1,6E+09  |
| G1SN43               | 0        | 0        | 0        | 0        | 0        | 22756000 |
| U3KN70;G1SN52        | 0        | 0        | 60081000 | 0        | 0        | 0        |

|                      |          |          |          |          |          |          |
|----------------------|----------|----------|----------|----------|----------|----------|
| G1TYG0;G1SN53        | 0        | 0        | 1,31E+08 | 0        | 0        | 0        |
| G1SN55               | 2,34E+09 | 3,4E+09  | 3,57E+09 | 2,36E+10 | 1,78E+10 | 1,3E+10  |
| G1SN56               | 0        | 2,2E+08  | 1,66E+08 | 2,8E+08  | 1,92E+08 | 2,02E+08 |
| G1SN62               | 0        | 1,8E+08  | 0        | 0        | 0        | 0        |
| G1SN66               | 3,47E+09 | 3,31E+08 | 3,96E+08 | 4,62E+09 | 4,94E+09 | 4,46E+09 |
| G1SN67               | 3,4E+08  | 1,12E+09 | 9,96E+08 | 3,75E+08 | 4,13E+08 | 3,92E+08 |
| G1SN68               | 4,29E+08 | 2,04E+09 | 1,91E+09 | 1,19E+09 | 1,31E+09 | 5,65E+08 |
| G1SN73               | 59761000 | 0        | 47389000 | 0        | 0        | 0        |
| G1SN74               | 6,48E+08 | 2,76E+08 | 0        | 0        | 0        | 0        |
| G1SN83               | 1,38E+09 | 8,99E+08 | 5,84E+08 | 2,24E+09 | 1,94E+09 | 2,13E+09 |
| G1SN91               | 1,67E+08 | 2,79E+09 | 3,32E+09 | 2,85E+08 | 0        | 0        |
| G1SN95               | 1,4E+10  | 7,6E+09  | 6E+09    | 3,63E+10 | 4,2E+10  | 6,19E+10 |
| G1SNB5;U3KPG8        | 9,68E+08 | 3,32E+08 | 2,83E+08 | 3,53E+08 | 3,53E+08 | 2,76E+08 |
| G1SNB8               | 2,94E+08 | 7,18E+08 | 3,03E+08 | 0        | 0        | 0        |
| G1SNC0               | 9,01E+08 | 6,85E+09 | 6,47E+09 | 7,04E+09 | 9,46E+09 | 8,52E+09 |
| G1SNC3               | 52613000 | 0        | 0        | 0        | 0        | 0        |
| G1U107;G1SNC4;P00569 | 4,94E+08 | 3,64E+09 | 3,93E+09 | 2,78E+09 | 3,84E+09 | 3,63E+09 |
| P17635;G1SND1;P17636 | 3,75E+09 | 1,15E+09 | 1,23E+09 | 5,1E+09  | 3,12E+09 | 2,64E+09 |
| G1SNE1               | 3,23E+08 | 2,43E+09 | 1,26E+09 | 0        | 2,23E+08 | 0        |
| G1SNE5               | 3,21E+09 | 7,97E+08 | 4,31E+08 | 2,31E+08 | 0        | 2,87E+08 |
| G1SNF2;G1SP76        | 3,47E+09 | 5,2E+08  | 5,08E+08 | 1,64E+08 | 2,37E+08 | 2,29E+08 |
| G1SNH4               | 4,36E+08 | 0        | 0        | 4,68E+08 | 4,32E+08 | 6E+08    |
| G1SNH7               | 6,69E+08 | 1,51E+09 | 1,49E+09 | 8,24E+08 | 1,11E+09 | 8,46E+08 |
| G1SNI2               | 2,79E+08 | 0        | 1,4E+08  | 2,35E+08 | 2,04E+08 | 2,21E+08 |
| G1SNI4               | 3,35E+09 | 1,58E+10 | 1,32E+10 | 3,03E+09 | 4,3E+09  | 5,53E+09 |
| G1SNJ3               | 3,01E+09 | 1,34E+09 | 1,55E+09 | 2,87E+09 | 3,22E+09 | 3,83E+09 |
| G1SNJ9               | 0        | 0        | 0        | 0        | 0        | 0        |
| G1SNK5               | 39620000 | 4,23E+08 | 4,59E+08 | 0        | 1,32E+08 | 1,17E+08 |
| G1SNK6               | 0        | 0        | 0        | 0        | 1,19E+08 | 0        |
| G1SNK8               | 7,27E+08 | 2,13E+08 | 2E+08    | 1,47E+09 | 1,12E+09 | 1,5E+09  |
| G1SNM1               | 8,75E+09 | 1,47E+10 | 1,46E+10 | 2,54E+08 | 2,43E+08 | 2,03E+08 |
| G1SNM5               | 1,27E+08 | 0        | 0        | 0        | 0        | 0        |
| G1SNM8               | 0        | 0        | 0        | 0        | 2,53E+08 | 0        |
| G1SNP4;G1TXZ3        | 4,96E+09 | 8,1E+09  | 7,34E+09 | 1,56E+10 | 2,01E+10 | 2,23E+10 |
| G1SNP7               | 0        | 0        | 0        | 0        | 0        | 37483000 |
| G1SNP8;U3KLW8;G1TRA8 | 4,34E+08 | 4,3E+09  | 3,5E+09  | 2,91E+08 | 3,53E+08 | 3,16E+08 |
| G1SNP9               | 4,86E+09 | 2,31E+09 | 1,74E+09 | 6,61E+09 | 5,59E+09 | 5,99E+09 |
| G1TKS6;G1SNQ8        | 1,31E+09 | 7,74E+08 | 6,42E+08 | 6,79E+08 | 9,92E+08 | 1,17E+09 |
| G1SNQ9               | 6,51E+09 | 1,45E+09 | 1,65E+09 | 6,6E+09  | 5,76E+09 | 3,59E+09 |
| G1SNR2               | 7,53E+09 | 1,4E+09  | 1,66E+09 | 1,22E+09 | 1,26E+09 | 0        |
| G1SNR6               | 47375000 | 0        | 0        | 0        | 0        | 0        |
| G1SNS3               | 8,27E+08 | 2,5E+08  | 1,55E+08 | 2,36E+09 | 2,26E+09 | 2,7E+09  |
| G1SNS8               | 2,71E+08 | 0        | 0        | 0        | 0        | 0        |
| G1SNT1               | 5,17E+08 | 2,59E+09 | 2,94E+09 | 3,62E+08 | 4,17E+08 | 3,99E+08 |
| G1SNT8               | 7,91E+09 | 2,55E+10 | 2,5E+10  | 6,73E+09 | 7,51E+09 | 7,02E+09 |
| G1SNU3               | 4,61E+08 | 5,34E+08 | 6,5E+08  | 4,09E+08 | 5,04E+08 | 5,28E+08 |
| G1SNV4               | 3,79E+09 | 2,41E+09 | 2,55E+09 | 4,43E+09 | 4,31E+09 | 6,59E+09 |
| G1SNW2               | 1,28E+09 | 4,39E+08 | 6,31E+08 | 4,07E+08 | 0        | 4,2E+08  |
| G1SNX5               | 2,49E+10 | 6E+09    | 5,61E+09 | 1,49E+10 | 1,39E+10 | 1,36E+10 |
| G1SNY0;U3KML6;G1TWD4 | 4,34E+09 | 2,1E+10  | 1,49E+10 | 5,85E+09 | 4,83E+09 | 4,74E+09 |

|                      |          |          |          |          |          |          |
|----------------------|----------|----------|----------|----------|----------|----------|
| G1SNY5               | 1,11E+08 | 1,1E+09  | 7,05E+08 | 1,6E+08  | 1,95E+08 | 1,5E+08  |
| G1SNZ2               | 1,28E+08 | 0        | 0        | 0        | 0        | 0        |
| G1SNZ3               | 5,84E+08 | 4,25E+09 | 4,31E+09 | 2,49E+08 | 1,38E+09 | 1,45E+09 |
| G1SNZ8               | 9,69E+08 | 3,01E+08 | 1,76E+08 | 1,12E+09 | 1,63E+09 | 1,95E+09 |
| G1SP02               | 3,12E+09 | 8,14E+08 | 8,4E+08  | 1,46E+09 | 1,11E+09 | 1,1E+09  |
| G1SP11               | 1,29E+08 | 0        | 0        | 0        | 0        | 0        |
| G1SP21               | 2,9E+08  | 1,15E+08 | 0        | 2,48E+08 | 2,73E+08 | 2,11E+08 |
| G1SP22               | 3,77E+08 | 0        | 0        | 5,18E+08 | 5,73E+08 | 3,52E+08 |
| G1SP24               | 9,68E+08 | 1E+09    | 1,04E+09 | 5,83E+08 | 4,67E+08 | 5,76E+08 |
| G1SP25               | 6,58E+08 | 4,36E+08 | 4,04E+08 | 6,87E+08 | 6,16E+08 | 4,6E+08  |
| G1SP27               | 2,52E+08 | 1,6E+09  | 1,66E+09 | 2,37E+08 | 3,25E+08 | 2,79E+08 |
| G1SP30               | 4,79E+08 | 3,49E+09 | 2,66E+09 | 5,85E+08 | 5,47E+08 | 3E+08    |
| G1SP32               | 3,55E+09 | 6,96E+08 | 6,37E+08 | 2,81E+09 | 2,21E+09 | 3,29E+09 |
| G1SP33               | 1,27E+08 | 0        | 0        | 0        | 0        | 0        |
| G1SP34               | 1,51E+09 | 1,2E+09  | 1,25E+09 | 4,59E+08 | 5,53E+08 | 5,7E+08  |
| G1SP37               | 6,54E+08 | 62506000 | 1,4E+08  | 2,13E+08 | 6,68E+08 | 1,45E+08 |
| G1SP45               | 2,18E+08 | 1,16E+09 | 1,38E+09 | 5,44E+08 | 5,65E+08 | 6,85E+08 |
| G1SP48               | 3,55E+09 | 2,64E+10 | 2,8E+10  | 1,95E+08 | 1,81E+08 | 1,15E+08 |
| G1SP51               | 4,7E+09  | 1,39E+10 | 1,57E+10 | 6,86E+09 | 6,09E+09 | 4,82E+09 |
| G1SP54               | 2,55E+08 | 1,45E+09 | 1,68E+09 | 8,61E+08 | 9,97E+08 | 4,54E+08 |
| G1SP61               | 9E+08    | 3,78E+08 | 3,18E+08 | 5,59E+08 | 8,13E+08 | 4,03E+08 |
| G1SP68;G1SP71;G1TZV8 | 2,51E+09 | 5,12E+08 | 5,5E+08  | 9,96E+08 | 8,09E+08 | 6,32E+08 |
| G1SP83               | 4,84E+09 | 1,47E+09 | 1,19E+09 | 8,55E+08 | 7,77E+08 | 8,56E+08 |
| G1SP85               | 2,85E+08 | 0        | 0        | 0        | 0        | 0        |
| G1SP89;G1TFZ5        | 5,33E+08 | 3,78E+08 | 2,31E+08 | 4,64E+08 | 3,54E+08 | 2,77E+08 |
| G1SPA6               | 2,29E+10 | 1,05E+10 | 9,58E+09 | 3,07E+10 | 2,87E+10 | 3,77E+10 |
| G1SPB2               | 0        | 0        | 2,83E+08 | 5,21E+08 | 6,57E+08 | 5,82E+08 |
| G1SPB6               | 2,58E+09 | 4,76E+08 | 4,45E+08 | 3,79E+09 | 2,23E+09 | 1,91E+09 |
| G1SPB8               | 1,2E+09  | 4,66E+09 | 4,21E+09 | 4,51E+08 | 8,13E+08 | 9,01E+08 |
| G1SPD1               | 1,5E+09  | 9,81E+09 | 9,67E+09 | 1,94E+09 | 1,61E+09 | 3,01E+09 |
| G1SPD2               | 7,58E+08 | 1,89E+09 | 2,08E+09 | 9,14E+08 | 1,08E+09 | 9,08E+08 |
| G1SPE9               | 1,7E+08  | 82604000 | 69644000 | 0        | 0        | 0        |
| G1SPF1               | 1,04E+09 | 2,95E+08 | 2,89E+08 | 6,76E+08 | 3,62E+08 | 6,79E+08 |
| G1TWB2;G1SPF4        | 6,09E+08 | 0        | 73154000 | 2,13E+08 | 0        | 0        |
| G1SPF5;G1U7S4        | 9,94E+09 | 4,28E+10 | 3,9E+10  | 1,36E+10 | 2,09E+10 | 1,78E+10 |
| G1SPF6               | 6,29E+08 | 2,93E+08 | 2,58E+08 | 2,55E+08 | 2,61E+08 | 2,6E+08  |
| G1SPG2               | 2,81E+09 | 2,25E+09 | 1,63E+09 | 3,7E+09  | 3,81E+09 | 4,49E+09 |
| G1SPG6               | 6,62E+08 | 2,13E+08 | 2,27E+08 | 8,2E+08  | 7,21E+08 | 3,7E+08  |
| G1SPH4               | 1,9E+08  | 7,25E+08 | 6,1E+08  | 2,2E+08  | 2,67E+08 | 2,82E+08 |
| G1SPH7               | 1,99E+08 | 1,31E+08 | 0        | 0        | 96693000 | 99020000 |
| G1SPH8               | 1,02E+09 | 3,46E+08 | 3,21E+08 | 7,01E+08 | 6,02E+08 | 4,52E+08 |
| G1SPI6               | 1,87E+09 | 6,39E+08 | 5,23E+08 | 5,4E+08  | 7,25E+08 | 9,34E+08 |
| G1SPI7               | 0        | 0        | 0        | 3,57E+08 | 0        | 0        |
| G1SPJ2               | 4,92E+09 | 1,99E+09 | 1,83E+09 | 1,81E+09 | 1,94E+09 | 1,55E+09 |
| G1SPJ5               | 5,38E+08 | 2,06E+09 | 1,82E+09 | 6,03E+08 | 3,68E+08 | 0        |
| G1SPJ6               | 1,34E+08 | 5,82E+08 | 2,81E+08 | 2,4E+08  | 0        | 0        |
| G1SPK4               | 7,57E+09 | 7E+09    | 7,3E+09  | 5,59E+09 | 4,58E+09 | 4,97E+09 |
| G1SPL0               | 2,76E+08 | 2,91E+09 | 2,98E+09 | 1,47E+08 | 0        | 3,15E+08 |
| G1SPL1               | 3,2E+08  | 7,76E+08 | 6,62E+08 | 2,8E+08  | 0        | 2,62E+08 |
| G1SPL7               | 1,71E+08 | 4,38E+08 | 3,7E+08  | 5,6E+08  | 3,77E+08 | 7,52E+08 |

|                      |          |          |          |          |          |          |
|----------------------|----------|----------|----------|----------|----------|----------|
| G1SPM5               | 1,18E+09 | 3,42E+09 | 3,54E+09 | 3,69E+08 | 3,41E+08 | 2,99E+08 |
| G1SPN1               | 3,71E+08 | 2,4E+09  | 2,6E+09  | 4,09E+08 | 4,63E+08 | 4,82E+08 |
| G1SPN3               | 6,39E+08 | 0        | 0        | 0        | 0        | 0        |
| G1SPN7               | 0        | 4,95E+08 | 1,7E+08  | 81899000 | 0        | 0        |
| G1SPN9               | 1,45E+08 | 4,27E+08 | 4,03E+08 | 0        | 0        | 0        |
| G1SPP4               | 8,53E+08 | 3,62E+08 | 2,43E+08 | 3,94E+08 | 4,24E+08 | 6,95E+08 |
| G1SPQ7;G1SVD2        | 1,37E+08 | 2,6E+09  | 1,21E+09 | 0        | 1,6E+08  | 1,23E+08 |
| G1TB88;G1SPQ9        | 2,23E+09 | 4,89E+09 | 4,79E+09 | 8,68E+09 | 1,03E+10 | 9,42E+09 |
| G1SPR5               | 1,91E+09 | 9,34E+08 | 9,25E+08 | 2,61E+09 | 1,92E+09 | 1,88E+09 |
| G1SPR9               | 3,27E+10 | 9,6E+09  | 8,81E+09 | 3,9E+10  | 2,69E+10 | 2,02E+10 |
| G1SPS5               | 0        | 0        | 0        | 81823000 | 0        | 0        |
| G1SPS6               | 0        | 1,2E+08  | 0        | 0        | 0        | 0        |
| G1SPS8               | 2,72E+08 | 2,5E+09  | 3,19E+09 | 0        | 0        | 2,95E+08 |
| G1SPT2               | 0        | 3,65E+08 | 9,3E+08  | 2,04E+08 | 1,33E+08 | 0        |
| G1SPU3               | 1,06E+08 | 0        | 0        | 0        | 0        | 0        |
| G1SPU6               | 1,12E+11 | 1,26E+11 | 1,54E+11 | 7,15E+10 | 6,49E+10 | 8,42E+10 |
| G1SPV0               | 4,39E+08 | 2,64E+09 | 3,01E+09 | 1,23E+08 | 0        | 2,87E+08 |
| G1SPV4               | 0        | 9,21E+08 | 0        | 0        | 0        | 0        |
| G1SPW1               | 0        | 0        | 0        | 0        | 0        | 19916000 |
| G1SPY1               | 3,88E+08 | 2,25E+09 | 1,4E+09  | 3,17E+08 | 4,14E+08 | 0        |
| U3KPB5;G1SPY8;P13355 | 1,59E+10 | 9,7E+09  | 7,84E+09 | 4,55E+10 | 4,85E+10 | 2,95E+10 |
| G1SPY9               | 7,42E+09 | 1,55E+09 | 2,37E+09 | 2,62E+09 | 1,31E+09 | 1,71E+09 |
| U3KN40;G1SPZ2        | 1,72E+08 | 8,55E+08 | 4,06E+08 | 2,25E+08 | 3,71E+08 | 0        |
| G1SPZ7;G1T569        | 2,99E+08 | 1,08E+09 | 1,08E+09 | 6,76E+09 | 6,66E+09 | 8,25E+09 |
| G1SPZ9;G1U2B1        | 2,47E+09 | 1,47E+09 | 1,24E+09 | 5,17E+08 | 8,59E+08 | 1,08E+09 |
| G1SQ01;G1TDJ6        | 3,66E+09 | 1,66E+10 | 1,83E+10 | 3,74E+09 | 4,92E+09 | 4,51E+09 |
| G1SQ02               | 4,05E+10 | 1,64E+11 | 1,71E+11 | 2,48E+10 | 3,96E+10 | 3,59E+10 |
| G1SQ03               | 4,38E+08 | 0        | 0        | 1,13E+08 | 0        | 0        |
| G1SQ07               | 1,1E+09  | 1,71E+09 | 9,03E+08 | 0        | 2,34E+08 | 0        |
| G1SQ11               | 1,52E+10 | 3,04E+09 | 2,87E+09 | 7,9E+09  | 5,91E+09 | 6,49E+09 |
| G1SQ22               | 2E+09    | 6,17E+09 | 5,51E+09 | 2E+09    | 1,87E+09 | 1,26E+09 |
| G1SQ23               | 0        | 2,85E+08 | 0        | 0        | 0        | 0        |
| Q9XSC5;G1SQ27        | 2,92E+10 | 1,82E+10 | 1,27E+10 | 1,6E+08  | 3,92E+08 | 1,29E+08 |
| G1SQ29;G1TLG4;G1TSB8 | 0        | 2,93E+08 | 2,44E+08 | 0        | 0        | 0        |
| G1SQ30               | 0        | 0        | 0        | 1,73E+08 | 94370000 | 0        |
| G1SQ32               | 1,15E+09 | 3,09E+08 | 3,09E+08 | 9,93E+08 | 1,03E+09 | 7,06E+08 |
| G1SQ44;G1U6I6;G1SQ49 | 8,73E+08 | 2,65E+08 | 3,97E+08 | 1,31E+09 | 6,95E+08 | 9,89E+08 |
| G1SQ45               | 2,74E+08 | 47074000 | 38273000 | 0        | 0        | 0        |
| G1SQ52               | 0        | 3,49E+08 | 4,23E+08 | 0        | 0        | 0        |
| P43242;G1SQ54        | 4,21E+09 | 9,55E+08 | 9,95E+08 | 1,84E+09 | 1,48E+09 | 1,97E+09 |
| G1SQ57               | 2,72E+08 | 3,92E+08 | 4,57E+08 | 5,42E+08 | 7,25E+08 | 7,11E+08 |
| G1SQ70;G1TR31        | 2,78E+08 | 2,28E+08 | 1,72E+08 | 1,37E+10 | 8,9E+09  | 7,41E+09 |
| G1SQ87               | 3,45E+08 | 3,13E+09 | 3,68E+09 | 7,25E+08 | 1,26E+09 | 1,53E+09 |
| G1SQA4               | 8,21E+08 | 2,12E+08 | 2,61E+08 | 5,62E+08 | 3,03E+08 | 1,64E+08 |
| G1SQA8               | 5,29E+11 | 1,99E+11 | 1,91E+11 | 4,72E+11 | 5,16E+11 | 6,36E+11 |
| G1SQB1               | 8,34E+09 | 1,8E+09  | 1,96E+09 | 7,25E+09 | 6,14E+09 | 5,21E+09 |
| G1SQD1;P41110;G1TR97 | 2,18E+09 | 4,93E+09 | 5,73E+09 | 1,35E+09 | 1,58E+09 | 8,65E+08 |
| G1SQE6               | 1,56E+08 | 1,7E+08  | 2,53E+08 | 1,31E+10 | 1,24E+10 | 1,24E+10 |
| G1SQF2               | 0        | 1,34E+09 | 1,52E+09 | 0        | 2,76E+08 | 3,18E+08 |
| G1SQF7               | 1,73E+09 | 3,75E+08 | 5,03E+08 | 2,35E+09 | 2,01E+09 | 2,2E+09  |

|                      |          |          |          |          |          |          |
|----------------------|----------|----------|----------|----------|----------|----------|
| G1SQF9               | 4,35E+09 | 5,36E+09 | 5,41E+09 | 9,19E+09 | 1,06E+10 | 1,13E+10 |
| G1SQG1               | 4,98E+08 | 0        | 1,85E+08 | 6,51E+08 | 4,86E+08 | 5,29E+08 |
| G1SQG5               | 7,91E+09 | 2,3E+10  | 2,16E+10 | 1,56E+10 | 1,72E+10 | 1,44E+10 |
| G1SQG7;G1SJ22        | 0        | 0        | 0        | 0        | 0        | 0        |
| G1SQH0;G1TET8        | 4,84E+09 | 2,11E+10 | 1,9E+10  | 6,04E+09 | 6,1E+09  | 5,33E+09 |
| G1SQH1               | 0        | 0        | 0        | 0        | 0        | 1,48E+08 |
| G1SQH2               | 7,76E+08 | 9,96E+08 | 1,06E+09 | 2,13E+09 | 1,91E+09 | 2,32E+09 |
| G1SQI0               | 5,73E+08 | 1,46E+09 | 1,79E+09 | 6,68E+08 | 8,94E+08 | 1,26E+09 |
| G1SQI2               | 0        | 62226000 | 0        | 0        | 0        | 0        |
| G1SQI4               | 6,02E+09 | 2,47E+09 | 2,68E+09 | 1,74E+10 | 2,31E+10 | 2,97E+10 |
| G1SQK0               | 0        | 1,99E+08 | 0        | 0        | 0        | 0        |
| G1SQK1               | 0        | 4,75E+08 | 4,65E+08 | 0        | 88736000 | 61917000 |
| G1SQK3               | 2,66E+08 | 5,41E+08 | 7,12E+08 | 0        | 4,38E+08 | 0        |
| G1SQL0               | 2,4E+09  | 5,41E+09 | 5,08E+09 | 2,58E+09 | 2E+09    | 2,37E+09 |
| G1SQL3               | 0        | 3,25E+08 | 3,47E+08 | 4,53E+08 | 3,75E+08 | 4,26E+08 |
| G1SQM2               | 0        | 0        | 1,39E+08 | 0        | 0        | 0        |
| G1SQM7               | 7,13E+08 | 7,7E+09  | 7,62E+09 | 2,46E+09 | 4,29E+09 | 4,91E+09 |
| G1SQP0               | 1,82E+08 | 1,59E+08 | 1,47E+08 | 1,88E+08 | 1,64E+08 | 72781000 |
| G1SQP9               | 3,07E+09 | 3,74E+09 | 3,73E+09 | 3,59E+09 | 2,68E+09 | 1,94E+09 |
| G1SQQ1               | 1,3E+08  | 82314000 | 1,41E+08 | 6,34E+09 | 4,53E+09 | 7,67E+09 |
| G1SQQ9               | 0        | 7,69E+09 | 6,2E+09  | 1,52E+10 | 8,82E+09 | 8,93E+09 |
| G1SQR6               | 3,72E+09 | 3,77E+10 | 3,53E+10 | 1,3E+10  | 1,68E+10 | 2,32E+10 |
| G1SQR7               | 4,09E+08 | 3,16E+09 | 3,04E+09 | 5,59E+08 | 1,02E+09 | 9,6E+08  |
| G1SQS0               | 4,28E+08 | 0        | 0        | 0        | 0        | 0        |
| G1SQS1               | 3,6E+08  | 1,54E+09 | 1,34E+09 | 4,71E+08 | 4,84E+08 | 3,29E+08 |
| G1SQS5               | 2,63E+09 | 6,72E+08 | 9,12E+08 | 2,31E+09 | 1,94E+09 | 2,7E+09  |
| G1SQS9;G1TPK9        | 6,02E+09 | 1,25E+09 | 1,35E+09 | 4,11E+09 | 4,26E+09 | 3,78E+09 |
| G1SQT0               | 0        | 4,18E+08 | 3,91E+08 | 0        | 0        | 2,65E+08 |
| G1SQT1               | 2,59E+09 | 4,95E+08 | 5,85E+08 | 1,84E+09 | 2,13E+09 | 2,22E+09 |
| G1SQT2               | 8,22E+08 | 4,85E+08 | 7,65E+08 | 9,89E+08 | 7,14E+08 | 9,33E+08 |
| G1SQU0               | 1,36E+10 | 7,7E+09  | 7,03E+09 | 3,89E+09 | 5,63E+09 | 6,46E+09 |
| Q28677;G1SQU5        | 1,1E+09  | 7,34E+08 | 6,38E+08 | 1,6E+09  | 9,6E+08  | 7,7E+08  |
| G1SQU6               | 1,79E+10 | 4,28E+09 | 3,66E+09 | 1,36E+10 | 1,34E+10 | 1,92E+10 |
| G1SQV5               | 1,65E+09 | 5,82E+09 | 6,73E+09 | 6,61E+08 | 8,86E+08 | 1,18E+09 |
| G1SQW0;G1U5I0        | 3,88E+09 | 2,1E+09  | 1,4E+09  | 9,78E+09 | 7,65E+09 | 4,43E+09 |
| G1SQX9               | 0        | 0        | 0        | 0        | 0        | 9,67E+08 |
| G1SQY8;G1TEZ4        | 1,22E+09 | 7,27E+09 | 6,66E+09 | 5,2E+08  | 4,76E+08 | 4,26E+08 |
| G1SQZ2;G1TWS2        | 3,16E+08 | 4,72E+08 | 4,8E+08  | 0        | 0        | 0        |
| G1SQZ4               | 3,87E+09 | 8,21E+09 | 8,49E+09 | 2,89E+09 | 2,52E+09 | 2,64E+09 |
| G1SQZ5               | 0        | 0        | 0        | 1,74E+08 | 0        | 1,25E+08 |
| G1SR03               | 3,6E+10  | 7,31E+10 | 7,78E+10 | 3,47E+10 | 3,9E+10  | 4,53E+10 |
| G1SR13               | 1,87E+10 | 4,78E+09 | 4,49E+09 | 1,3E+10  | 1,41E+10 | 1,7E+10  |
| G1SR16;U3KNN0        | 5,03E+08 | 1,83E+09 | 1,81E+09 | 1,14E+09 | 1,01E+09 | 1,33E+09 |
| G1SR19;G1TXB5;G1SXPO | 4,93E+08 | 0        | 1,02E+09 | 9,78E+08 | 7,56E+08 | 8,3E+08  |
| G1SR20               | 0        | 1,69E+08 | 1,37E+08 | 0        | 0        | 0        |
| G1SR25               | 3,45E+08 | 7,62E+08 | 4,44E+08 | 4,49E+08 | 2,23E+08 | 3,98E+08 |
| G1SR27               | 2,18E+08 | 1,17E+09 | 1,45E+09 | 1,99E+08 | 2,33E+08 | 2,27E+08 |
| G1SR28               | 2,38E+08 | 1,96E+09 | 2,08E+09 | 3,95E+08 | 4,38E+08 | 3,08E+08 |
| G1SR29               | 1,11E+10 | 8,07E+09 | 7,82E+09 | 6,84E+09 | 7,62E+09 | 7,27E+09 |
| G1SR36               | 4,26E+09 | 1,18E+09 | 1,07E+09 | 1,45E+09 | 1,76E+09 | 1,73E+09 |

|                        |          |          |          |          |          |          |
|------------------------|----------|----------|----------|----------|----------|----------|
| G1SR45;G1TLI7          | 2,18E+10 | 8,15E+09 | 7,61E+09 | 7,45E+10 | 8,38E+10 | 7,45E+10 |
| G1SR49                 | 1,63E+08 | 1,31E+09 | 1,01E+09 | 0        | 1,25E+08 | 1,28E+08 |
| Q9XSZ4;G1SR51;Q9XSZ4-2 | 4,42E+08 | 93445000 | 70742000 | 1,02E+10 | 7,32E+09 | 5,3E+09  |
| G1SR61                 | 6,3E+08  | 1,24E+08 | 1,36E+08 | 1,01E+08 | 63837000 | 1,66E+08 |
| G1SR63                 | 3,2E+08  | 0        | 1,48E+08 | 6,66E+08 | 2,67E+08 | 1,79E+08 |
| G1SR73                 | 0        | 0        | 0        | 6,9E+08  | 7,84E+08 | 1,47E+09 |
| G1SR77;G1U572;G1TGY3   | 0        | 0        | 0        | 3,14E+08 | 2,62E+08 | 2,69E+08 |
| G1SR79                 | 1,56E+09 | 2,11E+09 | 2,14E+09 | 9,39E+08 | 1,04E+09 | 1,14E+09 |
| G1SR83                 | 0        | 0        | 0        | 6,68E+08 | 0        | 6,23E+08 |
| G1SRA8;P33887          | 3,15E+09 | 3,58E+09 | 4,28E+09 | 1,01E+09 | 1,8E+09  | 1,06E+09 |
| G1SRA9                 | 1,62E+08 | 9,69E+08 | 1,53E+09 | 3,19E+08 | 1,21E+08 | 97320000 |
| G1SRB6                 | 1,45E+09 | 1,06E+10 | 1,1E+10  | 2,91E+09 | 4,78E+09 | 5,26E+09 |
| G1SRB7                 | 3,65E+09 | 2,01E+09 | 1,73E+09 | 4,16E+09 | 4,34E+09 | 4,42E+09 |
| G1SRD0;Q8MJC3          | 0        | 1,63E+08 | 1,98E+08 | 0        | 0        | 0        |
| G1SRD1                 | 2,45E+08 | 0        | 0        | 5,91E+08 | 3,34E+08 | 2,77E+08 |
| G1SRD2                 | 2,98E+10 | 9,53E+09 | 9,7E+09  | 8,93E+09 | 1,15E+10 | 1,06E+10 |
| G1SRD5                 | 0        | 0        | 1,99E+08 | 3,62E+08 | 0        | 90331000 |
| G1SRD9                 | 2,41E+08 | 3,27E+08 | 3,9E+08  | 0        | 0        | 0        |
| G1SRE0                 | 1,55E+09 | 5,71E+08 | 4,12E+08 | 9,68E+08 | 8,19E+08 | 1,13E+09 |
| G1SRE6;G1U429          | 1,54E+09 | 2,14E+09 | 1,9E+09  | 5,07E+09 | 5,47E+09 | 4,6E+09  |
| G1SRE8                 | 3,1E+08  | 3,33E+08 | 4,6E+08  | 4,98E+08 | 3,77E+08 | 4,3E+08  |
| G1SRF1;U3KNU1          | 4,84E+08 | 0        | 1,79E+08 | 1,65E+08 | 0        | 0        |
| G1SRF7                 | 3,05E+11 | 7,51E+10 | 7,66E+10 | 1,05E+11 | 1,45E+11 | 1,63E+11 |
| G1SRG3                 | 4,94E+08 | 6,79E+08 | 7,17E+08 | 3,28E+08 | 3,46E+08 | 4,74E+08 |
| G1SRG7                 | 0        | 1,03E+08 | 0        | 1,56E+08 | 1,22E+08 | 0        |
| G1SRH7                 | 5,11E+09 | 7,99E+09 | 8,27E+09 | 8,59E+09 | 1,2E+10  | 1,41E+10 |
| G1SRH8                 | 0        | 1,23E+08 | 1,55E+08 | 1,31E+08 | 0        | 1,53E+08 |
| G1SRH9                 | 3,71E+09 | 1,24E+09 | 1,2E+09  | 5,24E+09 | 4,9E+09  | 5,37E+09 |
| U3KNF3;G1SRI2          | 1,67E+08 | 5,97E+08 | 4,43E+08 | 1,49E+08 | 2,36E+08 | 0        |
| G1SRI8;G1SMV5;G1SD81   | 5,87E+09 | 3,05E+09 | 2,44E+09 | 5,61E+09 | 4,06E+09 | 2,35E+09 |
| G1SRI9;P45701          | 9,13E+08 | 1,42E+08 | 1,61E+08 | 3,77E+08 | 2,06E+08 | 2,1E+08  |
| G1SRL3                 | 1,85E+08 | 2,8E+08  | 7,2E+08  | 1,04E+08 | 0        | 0        |
| G1SRL4                 | 9,84E+09 | 4,54E+09 | 3,7E+09  | 7,2E+08  | 1,35E+09 | 1,78E+09 |
| G1SRM4;O77821;G1U734   | 2,45E+09 | 2,31E+09 | 1,92E+09 | 1,2E+09  | 1,02E+09 | 1,29E+09 |
| G1SRN1;U3KPK6          | 2,81E+08 | 0        | 0        | 0        | 0        | 0        |
| G1SRN2;G1TU04          | 0        | 1,51E+09 | 1,45E+09 | 6,36E+08 | 4,84E+08 | 8,08E+08 |
| G1SRP2                 | 1,21E+09 | 3,89E+08 | 3,43E+08 | 9,85E+08 | 1,02E+09 | 6,23E+08 |
| G1SRP7                 | 1,89E+08 | 7,95E+08 | 8,54E+08 | 3,92E+08 | 3,67E+08 | 2,95E+08 |
| G1SRP8                 | 0        | 3,6E+08  | 2,49E+08 | 2,17E+08 | 2,69E+08 | 3,45E+08 |
| G1SRQ2;U3KMW7          | 1,61E+09 | 8,75E+09 | 1,14E+10 | 1,86E+09 | 1,79E+09 | 2,62E+09 |
| G1SRQ8                 | 0        | 1,64E+08 | 0        | 0        | 0        | 0        |
| G1SRQ9                 | 3,29E+08 | 0        | 0        | 0        | 0        | 0        |
| G1SRR2                 | 0        | 0        | 2,81E+08 | 0        | 0        | 0        |
| G1SRR4                 | 78343000 | 0        | 0        | 1,25E+08 | 0        | 0        |
| G1SRS0                 | 1,53E+09 | 6,72E+08 | 6,89E+08 | 3,09E+09 | 2,53E+09 | 1,67E+09 |
| G1SRS3                 | 70467000 | 0        | 0        | 95115000 | 1,12E+08 | 0        |
| G1SRT1                 | 2,62E+08 | 1,91E+09 | 3,14E+09 | 3,9E+08  | 4,73E+08 | 3,58E+08 |
| G1SRV1;G1U3G7          | 1E+09    | 3,73E+08 | 6,34E+08 | 4,03E+08 | 2,93E+08 | 2,95E+08 |
| G1SRV2                 | 0        | 3,17E+08 | 2,8E+08  | 0        | 0        | 0        |
| G1SRW3                 | 1,36E+08 | 4,32E+08 | 3,25E+08 | 0        | 0        | 0        |

|                      |          |          |          |          |          |          |
|----------------------|----------|----------|----------|----------|----------|----------|
| G1SRW4               | 0        | 0        | 0        | 2,31E+08 | 0        | 0        |
| G1SRX2               | 9,85E+09 | 4,57E+09 | 4,85E+09 | 8,06E+09 | 5,96E+09 | 6,39E+09 |
| G1SRY1               | 1,18E+10 | 2,22E+09 | 2,3E+09  | 2,78E+09 | 2,61E+09 | 2,14E+09 |
| G1SRY7               | 2,04E+08 | 0        | 0        | 2,08E+08 | 99776000 | 65940000 |
| G1SRZ6               | 0        | 3,2E+08  | 3,29E+08 | 0        | 0        | 0        |
| G1SS22               | 0        | 0        | 0        | 1,14E+08 | 1,32E+08 | 86804000 |
| G1SS32               | 0        | 0        | 0        | 1,79E+08 | 2,4E+08  | 1,9E+08  |
| G1SS33;U3KMI5;G1TIW5 | 2,56E+09 | 1,19E+09 | 1,06E+09 | 1,34E+09 | 2,26E+09 | 2,31E+09 |
| G1SS37               | 5,93E+09 | 7,81E+08 | 8,99E+08 | 9,41E+08 | 1,12E+09 | 6,85E+08 |
| G1SS49               | 0        | 1,31E+08 | 64100000 | 0        | 55860000 | 59381000 |
| G1SS51               | 9,78E+08 | 2,31E+08 | 3,22E+08 | 2,52E+08 | 0        | 0        |
| G1SS70;G1TN72;G1U444 | 1,05E+10 | 4,62E+10 | 4,38E+10 | 9,91E+09 | 1,18E+10 | 9,04E+09 |
| G1SS73               | 2,04E+09 | 8,52E+09 | 9,38E+09 | 6,82E+09 | 8,5E+09  | 7,09E+09 |
| G1SS77               | 0        | 83097000 | 61161000 | 0        | 0        | 0        |
| G1SS79;G1U4U4        | 7,71E+08 | 4,59E+08 | 6,74E+08 | 1,24E+08 | 1,18E+08 | 0        |
| G1SS85               | 0        | 2,01E+08 | 0        | 0        | 0        | 0        |
| G1SS93               | 0        | 0        | 36279000 | 0        | 0        | 0        |
| G1SSA2               | 8,46E+09 | 9,14E+09 | 9,55E+09 | 3,45E+09 | 3,22E+09 | 3,35E+09 |
| G1SSB3               | 1,3E+08  | 74254000 | 0        | 0        | 0        | 0        |
| G1SSB4               | 3,8E+08  | 6,67E+08 | 7,17E+08 | 3,56E+08 | 4,93E+08 | 3,09E+08 |
| G1SSB5               | 5,04E+08 | 3,97E+08 | 7,47E+08 | 6,16E+08 | 4,44E+08 | 6,14E+08 |
| G1SSC9;G1TX43;G1SCH2 | 2,05E+08 | 1,92E+09 | 3,11E+09 | 81359000 | 1,47E+08 | 89707000 |
| G1SSF0               | 2,24E+08 | 2,52E+08 | 2,12E+08 | 1,63E+08 | 2,31E+08 | 1,96E+08 |
| G1SSF2               | 6,31E+08 | 3,77E+08 | 2,2E+08  | 2,8E+09  | 2,78E+09 | 3,28E+09 |
| G1SSF6               | 0        | 1,5E+09  | 7,75E+08 | 2,53E+08 | 2,08E+08 | 1,76E+08 |
| G1SSG3;G1SIQ6;U3KMG0 | 0        | 0        | 0        | 30298000 | 0        | 0        |
| G1SSG9               | 0        | 1,03E+08 | 86032000 | 0        | 91774000 | 1,09E+08 |
| G1SSH0               | 1,3E+08  | 1,61E+08 | 1,74E+08 | 6,1E+08  | 4,67E+08 | 6,6E+08  |
| G1SSJ7               | 7,2E+10  | 1,81E+10 | 1,69E+10 | 3,63E+10 | 3,27E+10 | 3,41E+10 |
| G1SSK8               | 9,04E+10 | 1,79E+10 | 1,89E+10 | 4,38E+10 | 3,46E+10 | 4,44E+10 |
| G1SSK9               | 2,3E+10  | 1,05E+11 | 1,11E+11 | 3,05E+10 | 3,93E+10 | 4,35E+10 |
| G1SSL0               | 3,71E+10 | 2,05E+10 | 2,16E+10 | 4,49E+10 | 3,83E+10 | 6,62E+10 |
| G1SSL2               | 1,86E+10 | 1,11E+10 | 1,15E+10 | 1,67E+10 | 1,76E+10 | 2,74E+10 |
| G1SSM6               | 1,89E+09 | 7,05E+08 | 6,53E+08 | 6,81E+08 | 6,74E+08 | 4,1E+08  |
| G1SSN2               | 1,87E+09 | 6,18E+08 | 1,07E+09 | 1,44E+09 | 1,39E+09 | 1,53E+09 |
| G1SSN5               | 0        | 1,12E+08 | 1,23E+08 | 0        | 0        | 0        |
| G1SSN9               | 1,59E+08 | 1,78E+08 | 1,89E+08 | 1,82E+08 | 0        | 0        |
| G1SSP0               | 3,59E+08 | 4,91E+08 | 4,3E+08  | 2,98E+08 | 3,46E+08 | 3,3E+08  |
| G1SSQ3               | 2,99E+08 | 0        | 0        | 2,49E+08 | 1,78E+08 | 1,93E+08 |
| G1SSR3               | 1,58E+08 | 0        | 0        | 0        | 0        | 0        |
| G1SSR8               | 5,16E+09 | 9,17E+08 | 1,38E+09 | 1,28E+09 | 1,37E+09 | 2,36E+09 |
| G1SST6               | 2,1E+08  | 0        | 82624000 | 4,65E+08 | 4,86E+08 | 4,06E+08 |
| G1SST7               | 9,12E+08 | 7,88E+08 | 5,23E+08 | 1,04E+09 | 1,32E+09 | 1,49E+09 |
| G1SST8               | 0        | 0        | 0        | 1,65E+08 | 0        | 0        |
| G1SST9               | 3,26E+09 | 1,11E+10 | 9,7E+09  | 3,45E+09 | 3,25E+09 | 4,91E+09 |
| U3KNG3;G1SSU5        | 1,36E+08 | 0        | 0        | 2,19E+08 | 5,11E+08 | 3,84E+08 |
| G1SSV1               | 5,52E+08 | 1,73E+09 | 1,41E+09 | 1,09E+09 | 1,07E+09 | 9,57E+08 |
| G1SSW2               | 2,61E+08 | 6,06E+08 | 8,69E+08 | 1,94E+08 | 2,28E+08 | 2,25E+08 |
| G1SSW3;G1TH11;G1TE10 | 6,96E+08 | 6E+08    | 4,85E+08 | 1,18E+09 | 1,55E+09 | 1,11E+09 |
| G1SSX0               | 38951000 | 0        | 0        | 0        | 0        | 0        |



|                      |          |          |          |          |          |          |
|----------------------|----------|----------|----------|----------|----------|----------|
| G1SSX2               | 2,26E+08 | 5,77E+08 | 7,15E+08 | 2,1E+08  | 0        | 2,12E+08 |
| G1SSX5               | 2,51E+08 | 5,21E+08 | 6,33E+08 | 3,14E+08 | 3,15E+08 | 2,15E+08 |
| G1SSY8               | 1,07E+09 | 2,86E+09 | 2,7E+09  | 0        | 0        | 0        |
| G1SSZ1               | 1,69E+08 | 3,2E+08  | 2,13E+08 | 0        | 0        | 1,91E+08 |
| G1ST05               | 5,45E+08 | 0        | 0        | 3,17E+08 | 0        | 2,74E+08 |
| G1ST16               | 2,4E+08  | 1,09E+09 | 1,87E+08 | 4,38E+08 | 0        | 0        |
| G1ST24               | 0        | 0        | 66753000 | 0        | 0        | 0        |
| G1ST34               | 1,04E+09 | 0        | 0        | 1,89E+08 | 0        | 0        |
| G1ST38               | 3,63E+08 | 1,76E+08 | 2,19E+08 | 1,15E+09 | 1,06E+09 | 4,3E+08  |
| G1ST44               | 3,04E+08 | 0        | 0        | 0        | 0        | 0        |
| G1ST49               | 8,49E+08 | 1,04E+09 | 1,12E+09 | 4,81E+08 | 4,49E+08 | 5,76E+08 |
| G1ST52               | 1,72E+08 | 0        | 0        | 0        | 0        | 0        |
| G1ST56               | 3,38E+08 | 7,37E+08 | 7,68E+08 | 0        | 0        | 0        |
| G1ST58               | 2,47E+08 | 2,33E+09 | 2,39E+09 | 3,5E+08  | 0        | 2,89E+08 |
| G1ST60               | 0        | 0        | 0        | 2,36E+08 | 0        | 1,66E+08 |
| G1ST63;G1TLG5        | 54041000 | 1,07E+08 | 2,21E+08 | 62204000 | 79984000 | 54301000 |
| G1ST66               | 4,83E+08 | 0        | 0        | 0        | 0        | 0        |
| G1ST68;G1TKV1;G1TB85 | 2,06E+09 | 7,74E+09 | 9,22E+09 | 5,46E+09 | 7,71E+09 | 6,2E+09  |
| G1ST69               | 3,41E+10 | 1,67E+10 | 1,54E+10 | 3,02E+10 | 2,5E+10  | 3,36E+10 |
| G1ST78;G1TAQ7        | 6,19E+08 | 4,64E+08 | 0        | 1E+09    | 1,02E+09 | 0        |
| G1ST81               | 3,29E+09 | 5,48E+08 | 6,44E+08 | 3,48E+09 | 2,81E+09 | 1,81E+09 |
| G1ST83               | 5,3E+08  | 2,46E+08 | 0        | 1,36E+09 | 5,89E+08 | 5,53E+08 |
| G1ST95               | 1,15E+09 | 7,68E+09 | 7,38E+09 | 7,34E+08 | 6,2E+08  | 7,2E+08  |
| G1STA1               | 2,03E+08 | 0        | 0        | 4,27E+08 | 0        | 2,59E+08 |
| G1STA9               | 0        | 0        | 0        | 0        | 0        | 0        |
| G1STB1;G1U3P7        | 3,27E+08 | 4,1E+09  | 4,35E+09 | 3,7E+08  | 3,94E+08 | 4,66E+08 |
| G1STB6;P68135;G1SL06 | 2,75E+10 | 5,71E+10 | 4,57E+10 | 6,96E+09 | 8,06E+09 | 1,65E+10 |
| G1STC5               | 2,79E+08 | 0        | 0        | 3,12E+08 | 3E+08    | 5,54E+08 |
| G1STC9               | 3,01E+08 | 1,92E+08 | 2,03E+08 | 1,03E+09 | 1,19E+09 | 1,35E+09 |
| G1STD4               | 0        | 0        | 0        | 4,7E+08  | 0        | 0        |
| G1STE1               | 1,73E+10 | 5,29E+09 | 5,14E+09 | 1,2E+10  | 1,59E+10 | 2,02E+10 |
| G1STE3;G1T8H2        | 4,94E+08 | 2,03E+09 | 2,26E+09 | 1,93E+09 | 1,59E+09 | 1,99E+09 |
| P19134;G1STF7;G1TKE4 | 8,2E+08  | 6,06E+08 | 7,45E+08 | 1,51E+09 | 1,68E+09 | 1,57E+09 |
| G1STF8               | 2,6E+09  | 2,91E+08 | 2,22E+08 | 3,64E+08 | 2,69E+08 | 2,73E+08 |
| G1STF9;Q5IH81        | 4,62E+09 | 1,45E+10 | 1,63E+10 | 1,19E+09 | 2,11E+09 | 2,06E+09 |
| G1STG2               | 6,1E+09  | 1,65E+09 | 1,64E+09 | 4,66E+09 | 3,73E+09 | 2,73E+09 |
| G1STG5               | 0        | 3,89E+08 | 4,56E+08 | 0        | 0        | 0        |
| G1STG8               | 0        | 0        | 5,85E+08 | 0        | 0        | 0        |
| G1STH0               | 7,09E+09 | 3,8E+09  | 3,86E+09 | 6,97E+09 | 7,19E+09 | 8,55E+09 |
| G1STH4               | 1,98E+09 | 9,35E+08 | 1,06E+09 | 2,05E+09 | 1,46E+09 | 1,15E+09 |
| G1STI3;G1T339        | 3,23E+09 | 2,46E+09 | 2,84E+09 | 5,96E+09 | 5,53E+09 | 5,72E+09 |
| G1STJ3               | 0        | 0        | 1,26E+08 | 0        | 1,04E+08 | 1,02E+08 |
| G1STJ8;G1TZ77        | 3,5E+08  | 0        | 0        | 0        | 0        | 0        |
| G1STL1               | 0        | 0        | 0        | 0        | 0        | 1,85E+08 |
| G1STM7;U3KN63        | 0        | 0        | 0        | 3,29E+08 | 0        | 0        |
| G1STM8;G1U3C3        | 0        | 1,47E+08 | 0        | 0        | 0        | 0        |
| G1STN6;G1TIP6        | 4,03E+09 | 1,22E+09 | 1,43E+09 | 7,07E+09 | 6,78E+09 | 8,29E+09 |
| G1STP3               | 5,69E+09 | 1,56E+09 | 1,39E+09 | 1,05E+10 | 8,2E+09  | 1,41E+10 |
| G1STP6;Q59I72;U3KNC8 | 1,92E+10 | 5,42E+09 | 6,22E+09 | 3,38E+10 | 3,03E+10 | 4,7E+10  |
| G1STQ0               | 4,19E+08 | 0        | 0        | 4,7E+08  | 3,76E+08 | 4E+08    |

|                      |          |          |          |          |          |          |
|----------------------|----------|----------|----------|----------|----------|----------|
| P10658;G1STQ6        | 3,6E+09  | 1,08E+10 | 9,9E+09  | 2,71E+09 | 2,99E+09 | 2,19E+09 |
| G1STR6               | 0        | 1,14E+08 | 0        | 0        | 0        | 0        |
| G1STS0;U3KMRO        | 6,26E+09 | 1,7E+09  | 1,99E+09 | 1,24E+09 | 1,63E+09 | 1,7E+09  |
| G1STS3               | 0        | 0        | 5,83E+08 | 9,46E+08 | 9,85E+08 | 0        |
| G1STS5               | 1,69E+08 | 0        | 77890000 | 2,47E+08 | 1,08E+08 | 1,36E+08 |
| G1STS8               | 89546000 | 0        | 0        | 0        | 0        | 0        |
| G1STS9               | 2,11E+09 | 5,02E+08 | 5,9E+08  | 1,32E+09 | 1,38E+09 | 1,54E+09 |
| G1STU0               | 3,11E+08 | 1,72E+09 | 1,84E+09 | 4,69E+08 | 6,52E+08 | 5,6E+08  |
| G1STU4               | 3,53E+08 | 0        | 0        | 0        | 0        | 0        |
| G1STU7;G1TGR8;G1TJZ9 | 4,06E+10 | 6,51E+09 | 7,39E+09 | 3,66E+10 | 3,02E+10 | 3,05E+10 |
| G1STV0;P08855        | 1,01E+09 | 9,72E+09 | 1,03E+10 | 1,91E+09 | 4,67E+09 | 3,47E+09 |
| G1STV3;G1TNL4;G1TAM4 | 4,7E+08  | 0        | 0        | 4,06E+08 | 3,35E+08 | 3,67E+08 |
| G1STW0               | 1,21E+10 | 2,67E+10 | 2,88E+10 | 1,27E+10 | 1,03E+10 | 8,66E+09 |
| G1STW7               | 4,06E+08 | 6,05E+08 | 8,26E+08 | 2,33E+08 | 2,23E+08 | 0        |
| G1STX3               | 2,79E+09 | 1,9E+09  | 2,03E+09 | 6,13E+09 | 4,41E+09 | 4,26E+09 |
| G1STX4               | 4,83E+08 | 6,07E+08 | 6,13E+08 | 2,34E+09 | 2,69E+09 | 2,44E+09 |
| G1STX7               | 8,92E+08 | 1,16E+09 | 1,31E+09 | 8,96E+08 | 1,05E+09 | 1,33E+09 |
| G1STX9               | 2,29E+08 | 0        | 0        | 1,97E+08 | 1,59E+08 | 1,67E+08 |
| G1TPR2;G1STY8        | 2,19E+08 | 9,18E+08 | 3,63E+08 | 0        | 1,66E+08 | 0        |
| G1STZ4               | 6,85E+09 | 1,63E+10 | 1,57E+10 | 9,67E+08 | 9,68E+08 | 5,69E+08 |
| G1STZ8               | 0        | 4,65E+08 | 2,04E+08 | 0        | 3,17E+08 | 1,6E+08  |
| G1SU01               | 6,84E+09 | 1,11E+09 | 8,62E+08 | 6,31E+09 | 5,26E+09 | 6,55E+09 |
| G1SU11;G1U053        | 7,12E+08 | 4,64E+08 | 4,15E+08 | 1,42E+09 | 1,07E+09 | 1,69E+09 |
| G1SU15               | 2,8E+09  | 8,5E+08  | 6,6E+08  | 2,75E+09 | 2,01E+09 | 1,57E+09 |
| G1SU17               | 2,31E+09 | 1,12E+09 | 6,67E+08 | 8,11E+08 | 6,72E+08 | 4,07E+08 |
| G1SU30               | 8,23E+08 | 1,58E+09 | 1,69E+09 | 9,8E+08  | 9,42E+08 | 1,13E+09 |
| G1SU33               | 1,04E+08 | 1,36E+08 | 2,93E+08 | 1,03E+08 | 1,13E+08 | 0        |
| G1SU50               | 2,96E+08 | 0        | 0        | 3,08E+08 | 2,1E+08  | 1,73E+08 |
| G1SU61               | 5,07E+09 | 1,27E+09 | 1,54E+09 | 1,12E+09 | 1,11E+09 | 1,3E+09  |
| G1SU66               | 3,31E+08 | 5,45E+09 | 6,43E+09 | 0        | 1,01E+08 | 1,21E+08 |
| G1SU71               | 3,62E+09 | 4,16E+09 | 3,49E+09 | 1,74E+09 | 1,9E+09  | 1,97E+09 |
| G1SU75               | 9,97E+08 | 2,44E+08 | 3,25E+08 | 1,39E+09 | 1,13E+09 | 4,32E+08 |
| G1SU97               | 5,77E+09 | 1,94E+09 | 1,92E+09 | 3,21E+09 | 4,52E+09 | 4,96E+09 |
| G1SU98;G1SR41;G1STI0 | 6,05E+08 | 1,21E+10 | 1,65E+10 | 1,67E+08 | 1,81E+08 | 1,12E+08 |
| G1SUA2;G1TQ14;G1TTF0 | 54305000 | 1,01E+09 | 1,13E+09 | 95344000 | 1,26E+08 | 76911000 |
| G1SUA4;G1U611;G1TUI3 | 6,98E+08 | 1,34E+09 | 1,39E+09 | 4,25E+09 | 7,33E+09 | 7,55E+09 |
| G1SUB5               | 0        | 0        | 0        | 2,45E+08 | 0        | 0        |
| G1SUC4               | 0        | 0        | 0        | 0        | 86771000 | 0        |
| G1SUC8               | 3,62E+08 | 2,8E+09  | 3,34E+09 | 1,62E+08 | 97355000 | 1,22E+08 |
| G1SUD1               | 2,37E+08 | 3,41E+08 | 0        | 7,64E+08 | 1,17E+09 | 2,31E+09 |
| G1SUD2               | 3,4E+09  | 7,07E+08 | 7,11E+08 | 4,18E+09 | 2,91E+09 | 2,11E+09 |
| G1SUD9;G1U4Z7        | 2,37E+09 | 4,79E+08 | 3,29E+08 | 1,86E+09 | 1,94E+09 | 1,7E+09  |
| O97862;G1SUE4        | 3,48E+08 | 1,58E+08 | 0        | 4,27E+08 | 5,01E+08 | 3,23E+08 |
| G1SUE6;G1TQW9;G1TT51 | 6,57E+08 | 2,84E+08 | 2,22E+08 | 1,7E+09  | 5,32E+08 | 7,22E+08 |
| G1SUE8               | 1,35E+08 | 9,6E+08  | 3,78E+08 | 1,59E+08 | 2,95E+08 | 2,31E+08 |
| G1SUF4               | 3,29E+09 | 6,61E+08 | 7,04E+08 | 2,27E+09 | 1,77E+09 | 1,45E+09 |
| G1SUF7               | 5,73E+08 | 2,93E+08 | 3,67E+08 | 6,83E+08 | 7,22E+08 | 6,7E+08  |
| G1SUG3               | 4,65E+08 | 0        | 2,33E+08 | 1,18E+09 | 8,54E+08 | 6,65E+08 |
| G1SUH5               | 1,63E+10 | 5,85E+09 | 3,75E+09 | 1,22E+10 | 1,45E+10 | 1,9E+10  |
| G1SUI9               | 1,24E+09 | 1,93E+10 | 2,09E+10 | 5,06E+09 | 8,24E+09 | 7,7E+09  |

|                      |          |          |          |          |          |          |
|----------------------|----------|----------|----------|----------|----------|----------|
| G1SUJ8               | 0        | 0        | 0        | 0        | 0        | 2,79E+08 |
| G1SUK4               | 1,07E+09 | 8,43E+08 | 1,3E+09  | 5,34E+08 | 0        | 0        |
| G1SUL3               | 2,15E+08 | 0        | 1,31E+08 | 1,47E+08 | 1,95E+08 | 1,69E+08 |
| G1SUL7               | 9,15E+08 | 3,43E+08 | 3,07E+08 | 5,49E+08 | 4,28E+08 | 6,04E+08 |
| G1SUM3               | 2,78E+08 | 1,37E+09 | 1,61E+09 | 2,76E+08 | 2,66E+08 | 2,56E+08 |
| G1SUN1               | 7,45E+09 | 2,16E+09 | 2,6E+09  | 6,89E+09 | 7,42E+09 | 7,54E+09 |
| G1SUN6               | 0        | 0        | 1,69E+08 | 0        | 0        | 0        |
| G1SUP1;G1SYU6        | 1,92E+08 | 6,64E+08 | 5,82E+08 | 2E+08    | 1,8E+08  | 2,4E+08  |
| G1SUP4               | 2,1E+08  | 2,81E+08 | 2,72E+08 | 4,6E+08  | 6,07E+08 | 6,63E+08 |
| G1SUP8               | 1,19E+09 | 4,1E+08  | 3,85E+08 | 1,55E+09 | 1,51E+09 | 9,6E+08  |
| G1SUP9               | 3,01E+09 | 3,44E+08 | 2,7E+08  | 1,68E+08 | 2,61E+08 | 2,31E+08 |
| G1SUQ0               | 3,75E+08 | 1,67E+08 | 1,02E+08 | 0        | 0        | 0        |
| G1SUQ9               | 2,57E+09 | 1,41E+09 | 2,42E+09 | 1,27E+09 | 1,21E+09 | 1,31E+09 |
| G1SUR4               | 7,28E+09 | 1,2E+09  | 1,46E+09 | 5,97E+08 | 5,72E+08 | 2,32E+08 |
| G1SUS6               | 1,25E+09 | 3,02E+08 | 3,25E+08 | 4,37E+08 | 4,23E+08 | 7,45E+08 |
| G1SUT0               | 0        | 59298000 | 1,37E+08 | 0        | 31658000 | 0        |
| G1SUT8               | 0        | 1,32E+08 | 0        | 0        | 0        | 0        |
| G1SUU2               | 3,23E+09 | 2,09E+09 | 2,56E+09 | 2,75E+09 | 3E+09    | 3,72E+09 |
| G1SUU7               | 1,93E+09 | 7,33E+09 | 7,09E+09 | 4,35E+09 | 4,8E+09  | 5,15E+09 |
| G1SUV0               | 2,41E+08 | 96399000 | 66984000 | 0        | 89167000 | 0        |
| G1SUV2               | 3,48E+08 | 1,25E+08 | 85977000 | 5,82E+08 | 4,51E+08 | 3,72E+08 |
| G1SUX1;O97590        | 4E+08    | 1,23E+08 | 74335000 | 5,3E+08  | 1,68E+08 | 1,22E+08 |
| G1TRC0;G1SUX8;G1U3E0 | 7,76E+08 | 1,59E+09 | 1,79E+09 | 2,98E+09 | 3,56E+09 | 3,65E+09 |
| G1SUY2;G1SU45        | 2,93E+10 | 1,04E+10 | 1,01E+10 | 1,51E+10 | 1,07E+10 | 1,5E+10  |
| G1SUY5               | 7,39E+08 | 2,82E+08 | 0        | 3,69E+09 | 1,34E+09 | 8,52E+08 |
| G1SUY8               | 3,75E+08 | 4,06E+08 | 0        | 4,04E+08 | 7,99E+08 | 7,87E+08 |
| G1SUZ7               | 2,67E+08 | 5,35E+08 | 0        | 9,49E+08 | 6,27E+08 | 7,05E+08 |
| G1SV03               | 0        | 0        | 0        | 59075000 | 0        | 0        |
| G1SV04               | 2,61E+09 | 3,14E+08 | 3,82E+08 | 3,16E+09 | 2,84E+09 | 3,71E+09 |
| G1SV05               | 8,63E+09 | 2,49E+10 | 2,67E+10 | 9,29E+09 | 9,51E+09 | 8,96E+09 |
| G1SV06               | 0        | 0        | 1,79E+08 | 0        | 0        | 0        |
| G1SV12               | 1,39E+10 | 4,98E+09 | 4,35E+09 | 7,36E+09 | 7,2E+09  | 6,25E+09 |
| G1SV13;Q29504        | 5,16E+09 | 2,43E+10 | 2,46E+10 | 7,74E+09 | 7,98E+09 | 7,91E+09 |
| G1SV22               | 0        | 0        | 0        | 0        | 0        | 2,29E+09 |
| G1SV24;G1TEK5;G1TCT0 | 6,59E+10 | 3,52E+10 | 4E+10    | 3,64E+10 | 3,15E+10 | 4,37E+10 |
| G1SV32;G1TGX8        | 8,02E+09 | 1,83E+10 | 2,07E+10 | 9,03E+09 | 7,98E+09 | 4,65E+09 |
| G1SV53               | 0        | 2,44E+08 | 2,93E+08 | 0        | 0        | 0        |
| G1U097;G1SV58;G1SCT3 | 0        | 4,08E+08 | 4,22E+08 | 4,46E+08 | 2,66E+08 | 3,15E+08 |
| G1SV59               | 0        | 0        | 0        | 4,13E+08 | 4,87E+08 | 4,59E+08 |
| G1SV60               | 1,04E+09 | 2,26E+08 | 1,54E+08 | 3,95E+08 | 3,35E+08 | 1,88E+08 |
| G1SV63;U3KPG1        | 0        | 0        | 1,96E+08 | 0        | 1,95E+08 | 3,09E+08 |
| G1SV65               | 0        | 80884000 | 75368000 | 0        | 0        | 0        |
| U3KPM5;G1SV69        | 0        | 0        | 2,21E+08 | 0        | 0        | 2,57E+08 |
| G1SV75               | 2,25E+09 | 5,36E+08 | 4,95E+08 | 1,47E+09 | 1,69E+09 | 1,62E+09 |
| G1SV79               | 0        | 1,66E+08 | 0        | 0        | 0        | 0        |
| G1SV81               | 0        | 4,89E+08 | 0        | 0        | 0        | 0        |
| G1SV82               | 32914000 | 0        | 0        | 0        | 0        | 0        |
| G1SV87               | 4,36E+08 | 0        | 0        | 1,54E+08 | 0        | 2,03E+08 |
| Q09YN8;G1SV99        | 0        | 3,27E+08 | 5,57E+08 | 3,38E+08 | 2,58E+08 | 2,79E+08 |
| G1SVA3               | 6,28E+09 | 8,15E+09 | 8,05E+09 | 3,47E+09 | 3,19E+09 | 2,82E+09 |

|                      |          |          |          |          |          |          |
|----------------------|----------|----------|----------|----------|----------|----------|
| G1SVB0;G1U0Z0;G1U598 | 1,08E+10 | 3,31E+10 | 2,79E+10 | 9,8E+09  | 1,1E+10  | 1,01E+10 |
| G1SVB3               | 1,3E+08  | 0        | 0        | 0        | 0        | 0        |
| G1SVB6;G1TV20        | 7,73E+10 | 2,99E+10 | 2,42E+10 | 2,58E+10 | 2,53E+10 | 2,34E+10 |
| G1SVC4               | 4,29E+08 | 0        | 0        | 0        | 2,7E+08  | 2,55E+08 |
| G1SVD5               | 9,5E+09  | 3,17E+09 | 3,4E+09  | 8,1E+09  | 5,25E+09 | 4,38E+09 |
| G1SVE2               | 1,3E+10  | 6,53E+09 | 5,89E+09 | 6,96E+10 | 4,79E+10 | 5,72E+10 |
| G1SVE5               | 0        | 0        | 0        | 0        | 1,01E+08 | 0        |
| G1SVE6;G1U1J2;G1TGM4 | 1,75E+08 | 1,44E+09 | 1,79E+09 | 1,54E+08 | 2,31E+08 | 3,41E+08 |
| G1SVF2               | 7,25E+09 | 1,09E+10 | 1,24E+10 | 4,13E+09 | 3,57E+09 | 4,09E+09 |
| G1SVF9               | 9,31E+08 | 4,22E+08 | 4,26E+08 | 0        | 3,64E+08 | 2,94E+08 |
| G1SVH0               | 2,71E+09 | 1,57E+10 | 1,45E+10 | 8,37E+09 | 9,61E+09 | 8,11E+09 |
| G1SVH1               | 1,33E+09 | 1,31E+08 | 1,13E+08 | 1,4E+08  | 1,1E+08  | 87666000 |
| U3KM97;G1SVI1        | 3,74E+08 | 4,44E+08 | 4,35E+08 | 6,01E+08 | 6,02E+08 | 5,74E+08 |
| G1SVI3               | 1,84E+08 | 0        | 0        | 3,82E+08 | 0        | 0        |
| G1SVI9               | 1,05E+10 | 2,64E+09 | 3,2E+09  | 1,1E+10  | 1,32E+10 | 1,3E+10  |
| G1SVJ2               | 0        | 0        | 0        | 0        | 2,28E+08 | 0        |
| P13642;G1SVJ5        | 1,58E+09 | 2,13E+09 | 2,54E+09 | 4,42E+08 | 4,9E+08  | 4,63E+08 |
| G1SVK5               | 1,74E+08 | 3,89E+09 | 4,25E+09 | 1,59E+08 | 2,24E+08 | 82745000 |
| G1TZX9;G1SVL8        | 0        | 0        | 3,15E+08 | 0        | 0        | 0        |
| G1SVM1               | 2,55E+09 | 5,52E+09 | 8,1E+09  | 4,07E+09 | 4,01E+09 | 5,47E+09 |
| G1SVM2               | 7,35E+08 | 0        | 0        | 5,93E+08 | 6E+08    | 7,15E+08 |
| G1U2Q4;G1TMN0;G1SVP6 | 8,67E+08 | 7,72E+08 | 5,94E+08 | 1,29E+09 | 1,64E+09 | 2,42E+09 |
| G1SVP7               | 1,42E+09 | 3,86E+09 | 3,81E+09 | 6,26E+08 | 8,42E+08 | 5,14E+08 |
| G1TB22;G1SVP9        | 1,57E+09 | 9,15E+08 | 1,1E+09  | 1,79E+09 | 1,98E+09 | 2,66E+09 |
| G1SVQ8;G1TL37        | 6,07E+09 | 1,46E+09 | 1,39E+09 | 7,45E+09 | 9,01E+09 | 7,81E+09 |
| G1SVR2               | 0        | 0        | 0        | 79270000 | 0        | 0        |
| G1SVR6;G1U988        | 0        | 0        | 0        | 0        | 1,64E+08 | 0        |
| G1SVS0               | 4,97E+08 | 3,5E+08  | 0        | 1,36E+09 | 7,52E+08 | 4,53E+08 |
| G1SVS1               | 3,07E+08 | 0        | 0        | 0        | 0        | 0        |
| G1SVT3               | 1,69E+09 | 1,78E+09 | 1,74E+09 | 2,59E+09 | 3,33E+09 | 3,95E+09 |
| G1SVT4               | 4,12E+09 | 4,42E+09 | 3,77E+09 | 2,27E+09 | 1,63E+09 | 1,96E+09 |
| G1SVU0               | 2,59E+09 | 1,11E+09 | 7,94E+08 | 1,98E+09 | 1,75E+09 | 2,77E+09 |
| G1SVU1               | 2,02E+08 | 3,4E+08  | 3,13E+08 | 0        | 0        | 0        |
| G1SVV2               | 2,08E+10 | 6,06E+09 | 7,19E+09 | 3,91E+09 | 3,07E+09 | 2,28E+09 |
| P29678;G1SVV6        | 4,83E+08 | 6,6E+09  | 5,15E+09 | 4,16E+08 | 4,54E+08 | 3,67E+08 |
| G1SVW5               | 1,07E+10 | 2,4E+10  | 2,48E+10 | 9,32E+09 | 7,04E+09 | 4,9E+09  |
| G1SVW7               | 6,1E+08  | 0        | 0        | 1,82E+09 | 7,98E+08 | 4,58E+08 |
| G1SVW9               | 1,21E+08 | 0        | 0        | 0        | 0        | 0        |
| G1SVX5               | 0        | 1,53E+08 | 1,37E+08 | 0        | 0        | 0        |
| G1SVY6               | 2,49E+08 | 1,54E+08 | 1,92E+08 | 2,18E+08 | 1,78E+08 | 1,7E+08  |
| G1SVY8;P00567        | 8,12E+09 | 3,81E+10 | 5,03E+10 | 1,4E+09  | 2,62E+09 | 4,76E+08 |
| G1SW00               | 3,6E+08  | 6,76E+08 | 6,42E+08 | 6,67E+08 | 1,51E+09 | 6,41E+08 |
| G1SW09               | 0        | 0        | 4,12E+08 | 5,02E+08 | 6,84E+08 | 5,54E+08 |
| G1SW10               | 1,28E+09 | 1,2E+09  | 1,35E+09 | 4,38E+09 | 2,52E+09 | 1,61E+09 |
| G1SW24               | 3,44E+09 | 6,26E+09 | 1,01E+10 | 5,76E+08 | 6,67E+08 | 3,51E+08 |
| G1SW25               | 41364000 | 0        | 0        | 97536000 | 67919000 | 0        |
| G1SW32;G1TN91        | 2,77E+08 | 3,34E+09 | 9,5E+08  | 1,43E+08 | 4,11E+08 | 1,23E+08 |
| G1SW36               | 1,58E+09 | 5,44E+08 | 4,32E+08 | 1,22E+09 | 6,76E+08 | 7,67E+08 |
| G1SW44               | 0        | 6,15E+08 | 4,94E+08 | 0        | 0        | 0        |
| G1SW48               | 0        | 3,17E+08 | 0        | 0        | 0        | 0        |

|                      |          |          |          |          |          |          |
|----------------------|----------|----------|----------|----------|----------|----------|
| G1SW61               | 1,45E+09 | 3,55E+08 | 3,98E+08 | 9,98E+08 | 5,99E+08 | 5,58E+08 |
| G1SW66               | 1,13E+08 | 53049000 | 52372000 | 59683000 | 36489000 | 25717000 |
| G1SW75               | 0        | 0        | 2,95E+08 | 0        | 0        | 2,25E+08 |
| G1SW77;U3KN98        | 1,41E+09 | 2,62E+10 | 2,61E+10 | 3,06E+09 | 4,72E+09 | 5,12E+09 |
| G1SW78               | 1,32E+08 | 4,51E+08 | 5,47E+08 | 1,22E+08 | 2,38E+08 | 2,36E+08 |
| U3KN12;G1SW89        | 2,94E+08 | 5,39E+08 | 0        | 7,86E+08 | 6,39E+08 | 6,52E+08 |
| G1SW91               | 4,22E+08 | 0        | 0        | 0        | 0        | 0        |
| G1SW97               | 1,37E+10 | 5,52E+09 | 4,4E+09  | 8,83E+09 | 9,33E+09 | 8,75E+09 |
| G1SWA1;G1SLR8        | 0        | 1,3E+08  | 0        | 1,9E+08  | 0        | 0        |
| G1SWA5               | 1,22E+08 | 89529000 | 97086000 | 1,9E+08  | 1,37E+08 | 2,44E+08 |
| G1U008;G1SWA6        | 1,14E+09 | 6,56E+08 | 7,71E+08 | 9,25E+08 | 9,39E+08 | 1,1E+09  |
| G1SWC2;G1SWCO        | 4,07E+08 | 3,11E+08 | 3,12E+08 | 9,58E+08 | 1,15E+09 | 1,05E+09 |
| G1SWC9               | 3,21E+08 | 5,48E+08 | 4,63E+08 | 6,26E+08 | 9,78E+08 | 1,07E+09 |
| G1SWD1               | 5,24E+09 | 1,43E+09 | 1,24E+09 | 3,05E+09 | 2,11E+09 | 1,47E+09 |
| G1SWD3;G1T0J1;G1SRW6 | 2,15E+08 | 4,39E+08 | 5,38E+08 | 1,17E+08 | 1,66E+08 | 0        |
| G1SWD8               | 0        | 0        | 0        | 3,77E+08 | 0        | 0        |
| G1SWD9               | 0        | 0        | 2,03E+08 | 0        | 0        | 0        |
| G1SWE4               | 2,4E+08  | 2,38E+08 | 0        | 0        | 2,1E+08  | 3,36E+08 |
| G1SWE5               | 3,21E+08 | 1,3E+09  | 1,23E+09 | 2,54E+08 | 4,21E+08 | 4,04E+08 |
| G1SWF2               | 2,96E+08 | 1,82E+09 | 1,47E+09 | 3,79E+08 | 3,83E+08 | 4,57E+08 |
| G1SWF3               | 1,41E+09 | 1,48E+08 | 1,22E+08 | 6,9E+08  | 3,27E+08 | 3,58E+08 |
| G1SWI3;P68003        | 2,87E+10 | 1,12E+10 | 9,15E+09 | 5,19E+10 | 5,21E+10 | 3,92E+10 |
| G1SWI7               | 2,16E+09 | 3,64E+09 | 4,73E+09 | 1,81E+09 | 1,56E+09 | 1,64E+09 |
| G1SWJ0               | 1,82E+09 | 6,49E+08 | 9,04E+08 | 8,46E+08 | 5,45E+08 | 9,16E+08 |
| G1SWK3;U3KNS5        | 3,45E+08 | 3,72E+08 | 2,6E+08  | 0        | 0        | 0        |
| G1SWK4               | 0        | 0        | 0        | 0        | 0        | 2,27E+08 |
| G1SWK5               | 8,63E+08 | 4,99E+08 | 2,34E+08 | 1,19E+09 | 5,29E+08 | 4,66E+08 |
| G1SWK8               | 1,57E+09 | 1,98E+09 | 1,81E+09 | 5,82E+08 | 7,12E+08 | 7,96E+08 |
| G1SWL6               | 0        | 3,86E+08 | 5,07E+08 | 3,32E+08 | 0        | 3,24E+08 |
| G1SWM1               | 0        | 0        | 0        | 0        | 0        | 3,87E+08 |
| G1SWM7;U3KPM4        | 2,06E+09 | 5,13E+08 | 4,08E+08 | 1,68E+09 | 1,99E+09 | 2,36E+09 |
| G1SWN4               | 2,53E+08 | 1,08E+09 | 4,14E+08 | 1,05E+08 | 1,54E+08 | 1,6E+08  |
| G1SWN7               | 9,08E+08 | 3,58E+08 | 3,02E+08 | 8,27E+08 | 5,54E+08 | 6,09E+08 |
| G1SWP1               | 7,49E+08 | 0        | 0        | 0        | 0        | 0        |
| G1SWR0               | 2,52E+09 | 1,15E+09 | 1,19E+09 | 1,25E+09 | 1,54E+09 | 2,06E+09 |
| G1SWR1               | 6,06E+08 | 2,86E+08 | 1,78E+08 | 2,55E+08 | 2,05E+08 | 99123000 |
| G1SWR7               | 2,08E+08 | 0        | 0        | 2,65E+08 | 2,25E+08 | 0        |
| G1SWS6;O46378        | 0        | 4,34E+08 | 0        | 1,38E+09 | 4,37E+08 | 9,35E+08 |
| G1SWS9;G1SRX8;G1SMX2 | 2,09E+12 | 7,80E+11 | 6,53E+11 | 9,79E+11 | 9,16E+11 | 6,22E+11 |
| G1SWT6               | 4,62E+08 | 2,56E+08 | 2,58E+08 | 4,18E+09 | 7,32E+09 | 6,11E+09 |
| G1SWT7               | 6,44E+08 | 2,58E+08 | 1,9E+08  | 1,75E+08 | 1,97E+08 | 1,85E+08 |
| G1SWU1               | 2,35E+10 | 7,34E+09 | 6,82E+09 | 1,09E+10 | 1,22E+10 | 1,28E+10 |
| G1SWU8               | 0        | 1,89E+08 | 1,29E+08 | 0        | 0        | 0        |
| G1SWV9               | 6,99E+08 | 3,94E+08 | 3,94E+08 | 7,69E+08 | 6E+08    | 1,01E+09 |
| G1SWW4               | 0        | 5,32E+08 | 6,4E+08  | 8,12E+08 | 7,75E+08 | 1,08E+09 |
| G1SWW6               | 0        | 1,59E+08 | 2,84E+08 | 1,16E+08 | 0        | 1,52E+08 |
| G1SWW7               | 6,62E+08 | 6,49E+08 | 6,6E+08  | 4,39E+08 | 7,85E+08 | 8,44E+08 |
| G1SWW8               | 3,92E+08 | 8,02E+08 | 9,45E+08 | 4,29E+08 | 4,04E+08 | 0        |
| G1SWY0               | 1,27E+10 | 3,4E+09  | 3,58E+09 | 1,88E+10 | 1,36E+10 | 8,22E+09 |
| G1SWY2               | 1,95E+08 | 0        | 0        | 1,81E+08 | 2,35E+08 | 2,19E+08 |

|                      |          |          |          |          |          |          |
|----------------------|----------|----------|----------|----------|----------|----------|
| G1SWY4;G1TS94        | 1,05E+09 | 2,53E+08 | 2,92E+08 | 2,76E+08 | 7,69E+08 | 2,47E+08 |
| G1SWY6               | 9,37E+08 | 1,42E+09 | 1,5E+09  | 5,91E+08 | 4,54E+08 | 3,89E+08 |
| G1SWY7               | 88939000 | 0        | 0        | 1,4E+08  | 2,15E+08 | 0        |
| G1SWZ1               | 3,11E+08 | 2,13E+09 | 2,4E+09  | 7,37E+08 | 6,38E+08 | 1,26E+09 |
| G1SWZ5               | 39134000 | 0        | 0        | 0        | 0        | 0        |
| G1SX00               | 2,3E+09  | 2,28E+09 | 2,42E+09 | 5,99E+09 | 7,28E+09 | 9,26E+09 |
| G1SX03               | 2,71E+08 | 69054000 | 1,51E+08 | 4,68E+08 | 4,57E+08 | 1,83E+08 |
| G1SX32               | 3,01E+08 | 1,57E+09 | 1,71E+09 | 2,5E+08  | 2,53E+08 | 2,87E+08 |
| G1SX37               | 3E+08    | 3,1E+09  | 2,92E+09 | 2,97E+08 | 4,26E+08 | 3,46E+08 |
| G1SX44               | 2,65E+09 | 4,87E+08 | 6,22E+08 | 7,98E+08 | 6,79E+08 | 9,72E+08 |
| G1SX47               | 7,43E+08 | 0        | 0        | 6,55E+08 | 7,15E+08 | 6,14E+08 |
| G1SX50               | 1,22E+08 | 0        | 0        | 0        | 0        | 0        |
| G1SX70               | 2,45E+08 | 2,35E+08 | 0        | 2,39E+08 | 2,93E+08 | 0        |
| G1SX71               | 0        | 0        | 0        | 3,18E+08 | 2,44E+08 | 0        |
| G1SX73               | 7,84E+08 | 4,02E+09 | 4,17E+09 | 7,33E+08 | 7,96E+08 | 8,43E+08 |
| G1SX89               | 6,34E+08 | 0        | 0        | 3,37E+08 | 2,48E+08 | 2,87E+08 |
| G1SX92               | 0        | 0        | 1,55E+08 | 0        | 0        | 0        |
| G1SXA5               | 2,48E+10 | 1,05E+10 | 9,78E+09 | 3,88E+10 | 2,62E+10 | 4,3E+10  |
| G1SXA8               | 0        | 1,83E+08 | 0        | 0        | 0        | 0        |
| G1SXB6               | 6,75E+08 | 1,8E+08  | 2,02E+08 | 1,13E+09 | 6,78E+08 | 5,63E+08 |
| G1SXB8               | 6,75E+08 | 5,64E+08 | 7,23E+08 | 3,09E+08 | 0        | 0        |
| G1SXC8               | 89682000 | 0        | 0        | 0        | 0        | 0        |
| G1SXD6               | 2,91E+09 | 9,91E+08 | 8,75E+08 | 4,62E+09 | 7,15E+09 | 5,22E+09 |
| G1SXE6               | 1,76E+08 | 7,71E+08 | 4,61E+08 | 1,08E+08 | 0        | 1,33E+08 |
| G1SXF1               | 3,97E+09 | 6,64E+08 | 7,07E+08 | 1,13E+09 | 2,38E+09 | 2,17E+09 |
| G1SXG8               | 2,05E+09 | 5,52E+08 | 4,98E+08 | 9,16E+09 | 5,61E+09 | 7,12E+09 |
| G1SXH2               | 0        | 0        | 3,91E+08 | 0        | 0        | 0        |
| G1SXI9               | 2,33E+10 | 7,85E+09 | 5,98E+09 | 4,16E+10 | 5,38E+10 | 6,37E+10 |
| G1SXJ0               | 1,47E+09 | 2,62E+09 | 2,21E+09 | 3,64E+09 | 5,62E+09 | 7,15E+09 |
| G1SXJ3               | 0        | 0        | 0        | 0        | 0        | 38435000 |
| G1SXJ6               | 0        | 0        | 0        | 1,46E+08 | 0        | 0        |
| G1S XK6              | 0        | 1,33E+09 | 1,37E+09 | 1,07E+08 | 1,36E+08 | 91257000 |
| G1S XK7              | 1,87E+08 | 0        | 0        | 0        | 0        | 0        |
| G1SXL3;G1TQF7;G1SCD7 | 6,09E+09 | 1,89E+10 | 1,77E+10 | 3,23E+09 | 4,61E+09 | 5,38E+09 |
| G1SXL9               | 1,13E+09 | 2,23E+08 | 1,51E+08 | 6,01E+08 | 4,34E+08 | 3,12E+08 |
| G1SXN0               | 3,21E+08 | 1,28E+08 | 1,48E+08 | 1,73E+08 | 0        | 1,22E+08 |
| G1SXP2               | 1,13E+08 | 5,57E+08 | 6,12E+08 | 0        | 0        | 0        |
| G1SXP8               | 29119000 | 0        | 0        | 0        | 0        | 0        |
| G1SXQ0               | 2,13E+09 | 6,13E+09 | 6,21E+09 | 2,01E+09 | 2,42E+09 | 1,92E+09 |
| G1SXQ1               | 4,11E+09 | 1,01E+09 | 9,85E+08 | 4,19E+09 | 3,65E+09 | 3,75E+09 |
| G1SXR6               | 0        | 0        | 0        | 0        | 0        | 2,31E+08 |
| G1SXR7               | 1,34E+10 | 3,59E+09 | 2,99E+09 | 3,24E+09 | 4,43E+09 | 4,5E+09  |
| G1SXS3               | 0        | 0        | 0        | 0        | 0        | 2,14E+08 |
| G1SXT1               | 2,61E+09 | 2,55E+09 | 2,41E+09 | 7,28E+09 | 6,64E+09 | 6,53E+09 |
| G1SXT7               | 5,6E+10  | 1,85E+10 | 1,58E+10 | 8,89E+10 | 8,25E+10 | 9,44E+10 |
| G1SXU2;G1UOH1        | 3,96E+09 | 2,27E+10 | 2,14E+10 | 1,22E+09 | 1,36E+09 | 1,13E+09 |
| G1SXU3;G1TMR9        | 0        | 0        | 1,82E+08 | 0        | 0        | 0        |
| G1SXW0               | 4,91E+09 | 1,72E+09 | 1,49E+09 | 4,78E+09 | 4,93E+09 | 4,37E+09 |
| G1SXX2               | 4,31E+09 | 5,71E+09 | 5,49E+09 | 6,46E+09 | 8,25E+09 | 8,87E+09 |
| G1SXX3               | 0        | 3,41E+08 | 3,49E+08 | 0        | 0        | 0        |

|                      |          |          |          |          |          |          |
|----------------------|----------|----------|----------|----------|----------|----------|
| G1SXX4;U3KMB9;G1TZ87 | 0        | 2,92E+08 | 1,81E+08 | 0        | 0        | 1,18E+08 |
| G1SXX5               | 5,1E+10  | 8,44E+09 | 7,89E+09 | 2,92E+10 | 2,43E+10 | 2E+10    |
| G1SXX8               | 7,73E+08 | 7,7E+08  | 0        | 2,01E+09 | 1,35E+09 | 6,1E+08  |
| G1SXZ9               | 2,88E+09 | 1,12E+09 | 1,05E+09 | 1,92E+09 | 1,94E+09 | 2,08E+09 |
| G1SY02               | 0        | 1,1E+09  | 1,23E+09 | 0        | 5,38E+08 | 5,38E+08 |
| G1SY05               | 0        | 6,59E+08 | 4,44E+08 | 3,66E+08 | 3,88E+08 | 4,89E+08 |
| G1SY12               | 4,1E+08  | 2,65E+08 | 2,01E+08 | 0        | 0        | 0        |
| G1SY15;G1TQJ8        | 0        | 0        | 0        | 2,25E+08 | 0        | 0        |
| G1SY18               | 1,56E+09 | 4,63E+08 | 3,32E+08 | 1,03E+09 | 1,23E+09 | 1,68E+09 |
| G1SY19;U3KNR7        | 1,64E+09 | 9,98E+08 | 6,92E+08 | 9,71E+08 | 1,11E+09 | 1,98E+09 |
| G1SY27               | 1,87E+09 | 9,39E+08 | 1,21E+09 | 1,4E+09  | 2,71E+09 | 3,51E+09 |
| G1SY28;Q9TTTT7       | 1,36E+10 | 4,51E+09 | 2,69E+09 | 1,64E+10 | 1,64E+10 | 3,26E+10 |
| G1SY30               | 5,07E+09 | 2,67E+09 | 2,29E+09 | 5,82E+09 | 4,16E+09 | 2,55E+09 |
| G1SY36               | 5,22E+09 | 2,21E+10 | 2,32E+10 | 3,69E+09 | 4,09E+09 | 3,95E+09 |
| G1SY38               | 0        | 6,08E+08 | 5,74E+08 | 0        | 0        | 0        |
| G1SY47;G1U1Z0        | 2,56E+08 | 2,81E+08 | 2,19E+08 | 6,89E+08 | 4,01E+08 | 7,9E+08  |
| G1SY50               | 1,31E+10 | 3,48E+09 | 3,1E+09  | 1,17E+10 | 1,44E+10 | 1,71E+10 |
| G1SY53;G1U4H0        | 2,86E+09 | 1,25E+10 | 1,16E+10 | 2,78E+09 | 3,54E+09 | 2,64E+09 |
| G1SY62;G1TQ21        | 2,98E+08 | 2,41E+08 | 0        | 0        | 0        | 0        |
| G1SY65;G1U5T1        | 3,55E+08 | 2,1E+09  | 2,3E+09  | 0        | 0        | 0        |
| G1SY68;G1TPR8        | 3,5E+09  | 2,79E+09 | 2,64E+09 | 8,31E+09 | 8,46E+09 | 1,14E+10 |
| G1SY70               | 1,07E+09 | 3,47E+09 | 3,74E+09 | 5,55E+08 | 5,94E+08 | 2,29E+08 |
| G1SY84;G1T2U7        | 4,37E+08 | 2,73E+09 | 2,81E+09 | 2,17E+08 | 3,01E+08 | 2,59E+08 |
| G1SY87               | 2,16E+08 | 0        | 0        | 7,31E+08 | 7,71E+08 | 7,12E+08 |
| G1SY88               | 0        | 1,34E+08 | 1,94E+08 | 0        | 0        | 0        |
| P35814;G1SY94        | 0        | 0        | 3,46E+08 | 0        | 0        | 3,29E+08 |
| G1SY96               | 4,66E+09 | 1,3E+09  | 1,06E+09 | 3,16E+09 | 2,52E+09 | 1,71E+09 |
| G1SYA5;G1U4K0        | 1,25E+09 | 8,34E+09 | 9,23E+09 | 3,04E+09 | 4,05E+09 | 3,36E+09 |
| G1SYB4;G1U978        | 8,4E+09  | 4,86E+09 | 5,13E+09 | 1,1E+10  | 8,95E+09 | 8,14E+09 |
| G1SYB9               | 8,71E+09 | 3,24E+09 | 3,38E+09 | 4,13E+09 | 3,38E+09 | 4,45E+09 |
| G1SYC1               | 6,02E+09 | 5,88E+08 | 6,02E+08 | 4,33E+09 | 3,45E+09 | 2,62E+09 |
| G1SYC5               | 1,97E+08 | 0        | 0        | 0        | 0        | 0        |
| G1SYC6               | 2,22E+08 | 0        | 0        | 1,35E+09 | 1,83E+09 | 1,98E+09 |
| G1SYC9               | 2,51E+08 | 0        | 0        | 2,26E+08 | 0        | 0        |
| G1SYD2               | 0        | 0        | 0        | 0        | 3,81E+08 | 0        |
| G1SYD3               | 6,99E+08 | 7,25E+09 | 6,36E+09 | 1,87E+08 | 2,27E+08 | 5,33E+08 |
| G1SYD6;U3KNJ6        | 1,51E+11 | 5,98E+10 | 6,72E+10 | 1,07E+11 | 9,42E+10 | 1,21E+11 |
| G1SYE0               | 3,08E+08 | 1,37E+09 | 4,37E+08 | 2,47E+08 | 3,09E+08 | 2,9E+08  |
| G1SYE3               | 2,28E+08 | 0        | 0        | 4,36E+08 | 4,61E+08 | 3,43E+08 |
| G1SYE7               | 2,19E+09 | 1,13E+09 | 1,51E+09 | 1,05E+09 | 1,15E+09 | 2,03E+09 |
| G1SYG0               | 1,58E+08 | 0        | 0        | 0        | 0        | 0        |
| G1SYH5               | 2,53E+09 | 4,38E+08 | 4,07E+08 | 2,58E+09 | 3,92E+09 | 4,28E+09 |
| G1SYI1               | 1,24E+08 | 0        | 0        | 0        | 0        | 0        |
| G1SYI2;G1T4D5        | 3,45E+10 | 1,32E+10 | 1,16E+10 | 1,46E+10 | 2,33E+10 | 1,61E+10 |
| G1SYI3               | 6,67E+08 | 3,83E+08 | 3,6E+08  | 1,12E+09 | 5,61E+08 | 4,87E+08 |
| G1SYI6               | 2,57E+08 | 6,37E+08 | 5,49E+08 | 4,06E+08 | 2,51E+08 | 0        |
| G1SYJ4;U3KN85        | 7,79E+10 | 3,10E+11 | 3,12E+11 | 9,01E+10 | 1,51E+11 | 1,05E+11 |
| G1SYJ6;G1SZF4;G1SZ30 | 1,2E+10  | 3,2E+10  | 3,23E+10 | 5,27E+09 | 6,36E+09 | 4,07E+09 |
| G1SYK0;G1TRJ6;G1TVT8 | 1,56E+08 | 1,46E+08 | 1,52E+08 | 1,61E+08 | 1,58E+08 | 1,5E+08  |
| G1SYK3               | 0        | 2,05E+08 | 2,59E+08 | 0        | 0        | 0        |

|                      |          |          |          |          |          |          |
|----------------------|----------|----------|----------|----------|----------|----------|
| G1SYL7               | 0        | 98573000 | 0        | 0        | 0        | 0        |
| G1SYL8               | 1,01E+09 | 2,93E+09 | 3,39E+09 | 1,18E+09 | 1,63E+09 | 1,43E+09 |
| G1SYL9               | 9,01E+08 | 1,5E+09  | 2,11E+09 | 1,6E+09  | 2,65E+09 | 2,76E+09 |
| G1SYM3               | 5,27E+09 | 2,14E+09 | 2,02E+09 | 4,31E+09 | 9,01E+09 | 5,92E+09 |
| G1SYN3               | 2,32E+08 | 1,2E+09  | 1,16E+09 | 2,9E+08  | 3,58E+08 | 3,49E+08 |
| G1SYP7               | 0        | 0        | 8,7E+08  | 0        | 0        | 0        |
| G1SYQ5;G1U879        | 0        | 0        | 1,39E+08 | 0        | 0        | 0        |
| G1SYR2               | 1,86E+09 | 3,49E+08 | 3,46E+08 | 4,36E+08 | 3,85E+08 | 3,74E+08 |
| Q28690;G1SYR5        | 0        | 1,72E+08 | 1,59E+08 | 0        | 0        | 0        |
| G1SYR9               | 3,95E+10 | 1,25E+10 | 1,14E+10 | 2,97E+10 | 2,88E+10 | 3E+10    |
| G1SYS4               | 0        | 5,17E+08 | 5,36E+08 | 0        | 0        | 0        |
| G1SYS5               | 1,06E+10 | 8,13E+09 | 7,35E+09 | 1,67E+10 | 1,61E+10 | 1,82E+10 |
| G1SYS9               | 3,45E+08 | 0        | 0        | 3,21E+08 | 2,68E+08 | 2,12E+08 |
| G1SYT7;U3KMB7        | 1,17E+10 | 3,61E+09 | 3,21E+09 | 4,42E+09 | 4,56E+09 | 5,34E+09 |
| G1SYU7               | 5,36E+08 | 4,61E+09 | 3,92E+09 | 6,99E+08 | 6,95E+08 | 7,75E+08 |
| G1SYV0               | 6,15E+09 | 9,35E+09 | 1,01E+10 | 4,09E+09 | 3,8E+09  | 4,27E+09 |
| G1SYV9               | 1,4E+10  | 3,74E+10 | 4,38E+10 | 6,24E+09 | 7,34E+09 | 7,06E+09 |
| G1SYW2               | 1,25E+08 | 1,21E+08 | 0        | 3,91E+08 | 1,57E+08 | 98331000 |
| G1SYX4;Q95220        | 1,28E+08 | 0        | 0        | 0        | 0        | 0        |
| G1SYX7               | 0        | 8,77E+08 | 6,52E+08 | 1,24E+09 | 2,72E+09 | 1,5E+09  |
| G1SYY0               | 88457000 | 0        | 0        | 0        | 0        | 0        |
| G1SYY1               | 4,45E+08 | 0        | 0        | 4,99E+08 | 0        | 0        |
| G1SYY4               | 4E+08    | 6,24E+08 | 6,16E+08 | 0        | 0        | 0        |
| G1SYZ6               | 9,68E+08 | 3,47E+08 | 3,08E+08 | 5,06E+08 | 5,46E+08 | 5,09E+08 |
| G1SZ00               | 1,04E+09 | 1,33E+10 | 1,5E+10  | 1,2E+09  | 1,36E+09 | 1,06E+09 |
| G1SZ03               | 2,44E+09 | 1E+10    | 1,24E+10 | 6,83E+08 | 4,91E+08 | 4,2E+08  |
| G1SZ12;U3KNW6        | 3,95E+09 | 1,65E+10 | 1,49E+10 | 5,24E+09 | 4,31E+09 | 3,03E+09 |
| G1SZ14               | 4,05E+09 | 7,53E+09 | 8,04E+09 | 2,44E+09 | 2,7E+09  | 2,76E+09 |
| G1SZ15               | 6,94E+09 | 3,65E+09 | 3,79E+09 | 2,91E+09 | 2,69E+09 | 3,9E+09  |
| G1SZ16               | 1,97E+08 | 0        | 1,52E+08 | 1,44E+08 | 2,91E+08 | 2,62E+08 |
| G1SZ18;G1SZH9;G1TD43 | 9,39E+08 | 8,17E+08 | 5,34E+08 | 1,33E+09 | 1,75E+09 | 1,46E+09 |
| G1SZ19               | 5,5E+08  | 0        | 0        | 0        | 0        | 0        |
| G1SZ23               | 1,29E+10 | 2,88E+09 | 2,68E+09 | 4,22E+09 | 3,85E+09 | 4,16E+09 |
| G1TQR4;G1SZ25        | 0        | 7,22E+08 | 1,3E+09  | 2,85E+08 | 3,02E+08 | 3,84E+08 |
| G1SZ37               | 5,6E+09  | 1,66E+09 | 1,68E+09 | 5,92E+09 | 6,96E+09 | 9,11E+09 |
| G1SZ44               | 1,08E+11 | 4,17E+10 | 4,86E+10 | 6,55E+10 | 7,26E+10 | 9,29E+10 |
| G1U046;G1SZ47;G1TZC6 | 1,3E+09  | 1,23E+10 | 1,2E+10  | 2,96E+09 | 3,08E+09 | 2,43E+09 |
| P29562;G1SZ59;U3KMP9 | 1,95E+10 | 9,87E+10 | 9,86E+10 | 5,68E+09 | 6,41E+09 | 5,97E+09 |
| G1SZ63               | 3,56E+09 | 3,55E+09 | 3,04E+09 | 4,84E+09 | 4,24E+09 | 3,13E+09 |
| G1SZ64               | 1,21E+09 | 0        | 5,7E+08  | 0        | 0        | 0        |
| G1SZ66               | 1,09E+09 | 2,07E+08 | 1,96E+08 | 1,04E+09 | 9,41E+08 | 5,86E+08 |
| G1SZ72               | 0        | 5,64E+08 | 4,77E+08 | 4,92E+08 | 4,39E+08 | 4,66E+08 |
| U3KNV8;G1SZ76;Q04504 | 2,27E+09 | 7,77E+09 | 8,74E+09 | 3,35E+09 | 3,53E+09 | 4,14E+09 |
| G1SZ85               | 2,93E+08 | 2,3E+09  | 2,26E+09 | 4,73E+08 | 5,01E+08 | 3,73E+08 |
| G1SZ91               | 4,91E+09 | 1,85E+10 | 2,25E+10 | 1,32E+09 | 1,18E+09 | 1,06E+09 |
| G1SZ93               | 7,66E+09 | 1,83E+09 | 1,77E+09 | 3,87E+09 | 2,83E+09 | 2,16E+09 |
| G1SZ94;G1SVK2        | 0        | 7,21E+08 | 6,57E+08 | 0        | 0        | 0        |
| G1SZA1;G1TTZ3        | 5,5E+08  | 3,99E+08 | 5,3E+08  | 1,4E+09  | 7,41E+08 | 2,13E+09 |
| G1SZB1               | 4,45E+08 | 0        | 0        | 3,08E+08 | 3,6E+08  | 2,83E+08 |
| G1SZC5;G1TUU1;G1SM80 | 9,36E+08 | 2,49E+09 | 2,41E+09 | 2,79E+09 | 2,61E+09 | 4,06E+09 |



|                      |          |          |          |          |          |          |
|----------------------|----------|----------|----------|----------|----------|----------|
| G1SZD2               | 1,97E+09 | 3,83E+08 | 4,03E+08 | 4,6E+08  | 4,95E+08 | 7,51E+08 |
| G1SZD6;Q6Q6X0        | 6,98E+09 | 2,95E+10 | 3,06E+10 | 3,7E+09  | 5,56E+09 | 5,99E+09 |
| G1SZE0               | 4,93E+08 | 3,11E+09 | 3,28E+09 | 3,8E+08  | 4,67E+08 | 2,14E+08 |
| G1SZE1               | 0        | 0        | 0        | 0        | 0        | 1,37E+08 |
| G1SZE4;G1SXY0;G1SZL0 | 6,99E+08 | 7,27E+08 | 7,67E+08 | 2,84E+09 | 1,73E+09 | 2,41E+09 |
| G1SZE8               | 1,14E+08 | 0        | 0        | 0        | 0        | 0        |
| G1SZF5               | 0        | 0        | 0        | 3,76E+08 | 3,12E+08 | 5,05E+08 |
| G1SZF7               | 2,8E+10  | 6,08E+09 | 5,99E+09 | 1,93E+10 | 1,85E+10 | 3,01E+10 |
| G1SZF9               | 4,93E+09 | 1,18E+09 | 1,18E+09 | 4,43E+09 | 4,99E+09 | 5,86E+09 |
| G1SZG3               | 7,1E+08  | 2,33E+08 | 2,2E+08  | 1,17E+09 | 7,01E+08 | 4,88E+08 |
| G1TMS0;G1SZG4        | 52574000 | 0        | 0        | 0        | 0        | 0        |
| G1SZG7               | 1,58E+08 | 3,48E+08 | 3,33E+08 | 1,04E+08 | 0        | 1,13E+08 |
| G1SZH6               | 1,2E+08  | 0        | 0        | 2,02E+08 | 2,12E+08 | 0        |
| G1SZI0               | 1,52E+08 | 0        | 0        | 0        | 0        | 0        |
| G1SZI7               | 1,65E+08 | 0        | 0        | 0        | 0        | 0        |
| G1SZJ5               | 6,19E+08 | 3,99E+09 | 4,58E+09 | 5,14E+08 | 6,46E+08 | 8,08E+08 |
| G1SZK4               | 3,74E+08 | 1,62E+09 | 1,57E+09 | 2,58E+08 | 3,33E+08 | 1,97E+08 |
| G1SZK8               | 0        | 1,76E+08 | 1,85E+08 | 0        | 0        | 0        |
| G1SZL3               | 2,19E+08 | 2,41E+08 | 2,08E+08 | 1,46E+09 | 1,17E+09 | 2,41E+09 |
| G1SZL5               | 0        | 0        | 51553000 | 0        | 0        | 0        |
| G1SZM2;G1SYG6        | 1,54E+09 | 4,66E+08 | 4,96E+08 | 3,02E+09 | 2,65E+09 | 2,38E+09 |
| G1SZN0               | 5,78E+08 | 3,44E+08 | 3,95E+08 | 6,16E+08 | 4,26E+08 | 3,7E+08  |
| G1SZN2               | 4,07E+09 | 5,06E+08 | 6,59E+08 | 1,68E+09 | 1,53E+09 | 1,64E+09 |
| G1SZP0;U3KM53        | 2,5E+08  | 3,97E+08 | 3E+08    | 1,54E+08 | 2,21E+08 | 2,76E+08 |
| G1SZP6               | 7,49E+10 | 9,28E+09 | 8,98E+09 | 3,4E+08  | 3,52E+09 | 5,65E+09 |
| G1SZQ1               | 4,66E+08 | 2,16E+09 | 6,68E+09 | 4,08E+08 | 6,17E+08 | 4,65E+08 |
| G1SZQ7               | 1,2E+09  | 2,41E+09 | 2,03E+09 | 3,65E+08 | 3,76E+08 | 2,7E+08  |
| G1SZR4               | 0        | 3,49E+08 | 0        | 0        | 0        | 3,57E+08 |
| G1SZR7               | 5,57E+09 | 1,58E+10 | 1,5E+10  | 7,25E+10 | 6,85E+10 | 6,54E+10 |
| G1SZR8;G1T2N0        | 9,08E+08 | 6,4E+09  | 7,16E+09 | 4,38E+09 | 8,19E+09 | 8,19E+09 |
| G1SZS2               | 0        | 0        | 0        | 3,46E+08 | 2,15E+08 | 3,01E+08 |
| G1SZT0               | 0        | 0        | 0        | 50303000 | 0        | 0        |
| G1SZT8               | 3,32E+09 | 5,42E+09 | 6,32E+09 | 1,63E+09 | 2,25E+09 | 3,32E+09 |
| G1SZW0;G1T1Z6        | 4,43E+08 | 6,35E+08 | 5,17E+08 | 0        | 0        | 0        |
| G1SZW8               | 0        | 1,81E+08 | 1,53E+08 | 0        | 0        | 0        |
| G1SZX4               | 0        | 0        | 0        | 0        | 0        | 5,32E+08 |
| G1SZZ2               | 2,16E+08 | 1,01E+09 | 8,08E+08 | 2,54E+08 | 2,53E+08 | 2,01E+08 |
| G1T004               | 1,48E+09 | 7,34E+09 | 3,71E+09 | 0        | 2,02E+09 | 1,48E+09 |
| G1T006               | 3,65E+09 | 2,29E+09 | 2,8E+09  | 1,07E+09 | 1,11E+09 | 1,91E+09 |
| G1T011               | 4,7E+08  | 5,25E+08 | 5,61E+08 | 3,9E+08  | 0        | 0        |
| G1T024               | 3,43E+08 | 2,33E+09 | 3,24E+09 | 5,62E+08 | 5E+08    | 3,01E+08 |
| G1T026;G1TLN3        | 0        | 8,42E+08 | 7,59E+08 | 3,65E+08 | 4,03E+08 | 4,93E+08 |
| G1T029               | 1,59E+08 | 0        | 0        | 0        | 0        | 0        |
| G1T044               | 2,24E+08 | 0        | 0        | 0        | 0        | 0        |
| G1T049               | 0        | 0        | 0        | 1,43E+09 | 1,42E+09 | 1,48E+09 |
| G1T057               | 0        | 55349000 | 0        | 0        | 0        | 0        |
| G1T060               | 1,37E+10 | 3,47E+09 | 3,26E+09 | 9,11E+09 | 7,7E+09  | 6,32E+09 |
| G1T069               | 6,16E+08 | 0        | 2,34E+08 | 1,34E+08 | 1,12E+08 | 0        |
| G1T072;G1U2N8        | 2,57E+08 | 3,54E+08 | 2,98E+08 | 2,18E+09 | 2,1E+09  | 4,36E+09 |
| G1T078               | 0        | 2E+08    | 1,61E+08 | 0        | 0        | 0        |

|                      |          |          |          |          |          |          |
|----------------------|----------|----------|----------|----------|----------|----------|
| U3KM69;G1T089        | 0        | 3,72E+08 | 3,75E+08 | 0        | 0        | 0        |
| G1TUD0;G1T091        | 0        | 0        | 0        | 0        | 41859000 | 0        |
| G1T096               | 2,41E+09 | 2,09E+09 | 2,41E+09 | 2,14E+09 | 3,6E+09  | 3,79E+09 |
| G1TOB0               | 0        | 1,54E+08 | 0        | 0        | 0        | 0        |
| G1TOB1               | 4,92E+08 | 0        | 0        | 0        | 72245000 | 0        |
| G1TOB4               | 8,65E+09 | 2,83E+09 | 3,03E+09 | 2,05E+10 | 1,85E+10 | 1,8E+10  |
| G1TOC1;G1SF30;G1U432 | 5,33E+09 | 1,39E+10 | 1,47E+10 | 5,71E+09 | 4,01E+09 | 3,31E+09 |
| G1TOC2               | 2,78E+08 | 0        | 0        | 0        | 0        | 0        |
| G1TOC5               | 1,7E+08  | 4E+08    | 3,12E+08 | 0        | 0        | 0        |
| U3KNP3;G1TOC8;G1TOF7 | 7,73E+08 | 2,83E+08 | 3,37E+08 | 0        | 8,76E+08 | 2,42E+08 |
| G1TOE3;U3KLU2        | 2,38E+08 | 3,17E+08 | 3,16E+08 | 1,13E+09 | 9,01E+08 | 5,25E+08 |
| G1TOE5               | 7,79E+08 | 4,1E+08  | 2,33E+08 | 1,06E+09 | 1,02E+09 | 1,01E+09 |
| G1TOF3               | 1E+09    | 2,12E+08 | 2,29E+08 | 1,49E+09 | 1,45E+09 | 3,89E+08 |
| G1TOF6               | 2,57E+08 | 6,15E+08 | 3,34E+08 | 0        | 0        | 0        |
| G1TOG0               | 66737000 | 0        | 0        | 0        | 0        | 0        |
| G1TOH0               | 3,35E+08 | 1,12E+09 | 1,01E+09 | 3,28E+08 | 4,28E+08 | 4,22E+08 |
| G1TOH1               | 2,23E+08 | 0        | 0        | 0        | 0        | 0        |
| G1TOH3               | 3,35E+08 | 5,8E+08  | 1,14E+09 | 2,52E+08 | 0        | 0        |
| G1TOH6               | 0        | 3,17E+08 | 0        | 0        | 0        | 0        |
| G1TOH7               | 2,91E+08 | 6,17E+08 | 8,78E+08 | 2,62E+08 | 2,93E+08 | 2,62E+08 |
| G1TOH8;P47859;U3KNG6 | 6,29E+09 | 2,53E+10 | 2,45E+10 | 6,47E+09 | 6,07E+09 | 4,32E+09 |
| G1TOI5               | 1,8E+10  | 4,36E+09 | 4,91E+09 | 7,9E+09  | 5,97E+09 | 5,94E+09 |
| U3KMP8;G1TOJ3        | 4,81E+08 | 0        | 1,35E+08 | 1,45E+08 | 1,99E+08 | 0        |
| G1TOJ4               | 1,36E+09 | 9,81E+08 | 3,77E+08 | 1,79E+09 | 1,13E+09 | 1,78E+09 |
| G1TOK1               | 5,81E+09 | 1,71E+09 | 1,56E+09 | 7,02E+09 | 5,84E+09 | 3,46E+09 |
| G1TOK2               | 0        | 2,47E+08 | 4,39E+08 | 0        | 2,3E+08  | 2,63E+08 |
| G1TOK5               | 5,38E+08 | 0        | 0        | 5,67E+08 | 2,71E+08 | 3,61E+08 |
| G1TOL0;G1TJ21        | 0        | 1,3E+08  | 0        | 1,42E+08 | 0        | 1,85E+08 |
| G1TOL9               | 6,91E+10 | 1,35E+10 | 1,42E+10 | 7,03E+10 | 5,34E+10 | 3,73E+10 |
| G1TOM0               | 2,31E+08 | 64613000 | 1,17E+08 | 1,08E+08 | 1,17E+08 | 1,04E+08 |
| G1TOM2               | 5,55E+09 | 1,58E+09 | 1,76E+09 | 2,37E+09 | 2,31E+09 | 3,03E+09 |
| G1TOM8;G1TR21;U3KMT8 | 0        | 2,27E+09 | 1,89E+09 | 3,29E+08 | 5,14E+08 | 5,74E+08 |
| G1U1F7;G1TXI1;G1TON4 | 4,75E+10 | 7,8E+10  | 8,13E+10 | 9,28E+09 | 1,32E+10 | 1,54E+10 |
| G1TON5               | 1,94E+09 | 3,76E+09 | 3,24E+09 | 1,03E+10 | 1,16E+10 | 1,24E+10 |
| G1TOP3               | 0        | 0        | 2,1E+09  | 0        | 0        | 0        |
| G1TOQ6               | 0        | 0        | 0        | 1,33E+08 | 0        | 0        |
| G1TOR8               | 0        | 3,2E+08  | 2,43E+08 | 4,11E+08 | 1,04E+09 | 8,24E+08 |
| G1TOR9               | 2,31E+09 | 8,39E+09 | 6,71E+09 | 1,18E+10 | 1,69E+10 | 1,81E+10 |
| G1TOS0;G1TNJ0        | 1,88E+08 | 2,34E+08 | 1,4E+08  | 9,41E+08 | 6,89E+08 | 3,58E+08 |
| G1TOT1               | 2,57E+09 | 4,84E+08 | 4,53E+08 | 2,25E+09 | 2,72E+09 | 2,28E+09 |
| G1TOT3               | 0        | 0        | 1,97E+08 | 0        | 0        | 0        |
| G1TOT5               | 3,58E+08 | 6,63E+08 | 6,78E+08 | 1,03E+09 | 7,83E+08 | 8,16E+08 |
| G1TOT6               | 1,15E+09 | 3,97E+08 | 3,53E+08 | 8,44E+08 | 7,77E+08 | 7,51E+08 |
| G1TOU0               | 0        | 0        | 0        | 0        | 0        | 1,09E+08 |
| G1TOU4               | 6,54E+08 | 0        | 0        | 1,01E+08 | 0        | 0        |
| G1TOU5               | 3,92E+08 | 4,7E+08  | 7,69E+08 | 1,43E+08 | 1,84E+08 | 2,26E+08 |
| G1TOU8               | 3,14E+10 | 6,15E+09 | 5,54E+09 | 4,99E+10 | 4,11E+10 | 3,73E+10 |
| G1TOV4;G1TXZ2        | 2,45E+09 | 2,73E+09 | 2,56E+09 | 4,86E+09 | 5,37E+09 | 6,18E+09 |
| G1TOW0               | 0        | 4,3E+08  | 7,08E+08 | 0        | 0        | 0        |
| G1TOW1               | 1,62E+08 | 97572000 | 97072000 | 2,32E+08 | 1,42E+08 | 1,12E+08 |

|                      |          |          |          |          |          |          |
|----------------------|----------|----------|----------|----------|----------|----------|
| G1TOW7               | 2,77E+09 | 6,51E+08 | 5,35E+08 | 1,24E+09 | 1,14E+09 | 1,37E+09 |
| G1TOX6               | 0        | 0        | 0        | 1,89E+08 | 0        | 0        |
| G1TOY3               | 4,68E+08 | 68882000 | 0        | 49776000 | 77818000 | 63121000 |
| G1TOY9               | 2,52E+09 | 8,08E+09 | 8,61E+09 | 1,51E+09 | 1,96E+09 | 1,95E+09 |
| G1TOZ8               | 3,92E+08 | 1,46E+09 | 1,82E+09 | 3,03E+08 | 2,47E+08 | 2,45E+08 |
| G1T103               | 0        | 1,1E+09  | 8,7E+08  | 2,95E+08 | 5,2E+08  | 5,59E+08 |
| G1T108               | 1,2E+09  | 2,81E+08 | 4,14E+08 | 3,52E+08 | 2,82E+08 | 3,74E+08 |
| G1T109;U3KPJ1;G1ST36 | 0        | 1,86E+08 | 1,07E+08 | 94256000 | 1,25E+08 | 0        |
| G1T112;O46651        | 6,97E+09 | 2,06E+09 | 1,93E+09 | 8,81E+09 | 1,14E+10 | 1,31E+10 |
| G1T116               | 1,5E+09  | 3,29E+08 | 2,58E+08 | 2,52E+08 | 2,41E+08 | 2,25E+08 |
| G1T120               | 2,88E+09 | 4,33E+08 | 4,22E+08 | 1,42E+09 | 1,23E+09 | 9,32E+08 |
| G1T125               | 1,56E+08 | 1,8E+08  | 0        | 1,85E+08 | 2,21E+08 | 2,89E+08 |
| G1T134               | 7,57E+08 | 0        | 0        | 2,28E+08 | 2,56E+08 | 3,1E+08  |
| G1T135               | 0        | 0        | 0        | 0        | 0        | 4,01E+08 |
| G1T139               | 7,1E+09  | 1,94E+09 | 2,28E+09 | 2,57E+09 | 2,33E+09 | 2,28E+09 |
| G1T150               | 3,16E+08 | 3,43E+08 | 2,75E+08 | 3,47E+08 | 2,93E+08 | 0        |
| U3KNV1;G1T151        | 4,28E+08 | 5,21E+08 | 4,62E+08 | 4,18E+08 | 4,67E+08 | 3,87E+08 |
| G1T156               | 1,16E+09 | 5,44E+08 | 4,74E+08 | 6,41E+08 | 5,32E+08 | 6,16E+08 |
| G1T159               | 5,61E+08 | 1,41E+08 | 1,73E+08 | 1,37E+08 | 1,34E+08 | 0        |
| G1T161               | 81873000 | 0        | 0        | 1,38E+08 | 91288000 | 0        |
| Q95209;G1T165        | 2,21E+08 | 0        | 0        | 0        | 2,78E+08 | 3,81E+08 |
| G1T169               | 1,77E+08 | 3,09E+08 | 2,9E+08  | 2,42E+08 | 3,78E+08 | 3,78E+08 |
| G1T176               | 2,02E+08 | 4,11E+08 | 2E+08    | 7,85E+08 | 1,08E+09 | 1,73E+09 |
| G1T182               | 1,03E+09 | 1,25E+09 | 1,26E+09 | 3,56E+09 | 4,42E+09 | 4,44E+09 |
| G1T188               | 6,65E+09 | 1,73E+09 | 1,59E+09 | 6,55E+09 | 7,97E+09 | 6,67E+09 |
| G1T194               | 3,34E+08 | 1,9E+08  | 1,91E+08 | 2,42E+08 | 2,58E+08 | 4,84E+08 |
| G1T196;G1TT26;G1U3A7 | 4,87E+08 | 1,37E+09 | 7,76E+08 | 5,75E+08 | 5,05E+08 | 8,7E+08  |
| G1T197               | 1,48E+08 | 0        | 0        | 0        | 0        | 0        |
| G1T1B7               | 1,63E+08 | 2,54E+08 | 3,61E+08 | 1,96E+08 | 3,29E+08 | 3,14E+08 |
| G1TQ59;G1T1C4        | 8,12E+08 | 0        | 2,02E+08 | 2,69E+08 | 2,35E+08 | 1,67E+08 |
| G1T1C5               | 0        | 1,37E+08 | 80750000 | 0        | 55619000 | 0        |
| G1T1C6               | 1,65E+09 | 0        | 5,48E+08 | 0        | 0        | 0        |
| G1T1D9               | 0        | 5,57E+08 | 8,23E+08 | 4,91E+08 | 4,65E+08 | 3,94E+08 |
| G1T1E6               | 1,62E+08 | 5,25E+08 | 2,91E+08 | 0        | 0        | 0        |
| G1U472;G1T1F0;G1TLY4 | 4,2E+09  | 1,49E+10 | 1,6E+10  | 4,36E+09 | 4,89E+09 | 4,6E+09  |
| G1T1G0               | 1,49E+09 | 3,15E+08 | 2,65E+08 | 4,49E+08 | 3,49E+08 | 7,86E+08 |
| G1T1G2;U3KPJ6        | 6E+09    | 9,59E+08 | 7,6E+08  | 5,53E+08 | 6,55E+08 | 2,99E+08 |
| U3KLU6;G1T1G4        | 1,39E+08 | 3,74E+08 | 3E+08    | 74282000 | 0        | 0        |
| G1U586;G1T1G5;G1SJD2 | 2,91E+08 | 5,08E+08 | 2,28E+08 | 0        | 1,26E+08 | 1,41E+08 |
| G1T1K0               | 4,26E+08 | 0        | 3,06E+08 | 7,49E+08 | 8,98E+08 | 3,34E+08 |
| G1T1L1               | 1,06E+09 | 3,22E+08 | 2,24E+08 | 1,72E+09 | 1,29E+09 | 5,23E+08 |
| G1T1L4               | 9,31E+08 | 1,11E+09 | 1,54E+09 | 4,27E+08 | 3,71E+08 | 4,18E+08 |
| G1T1L7               | 89052000 | 0        | 0        | 0        | 0        | 0        |
| G1T1P3               | 5,16E+09 | 7,07E+08 | 7,72E+08 | 1,63E+09 | 1,84E+09 | 7,98E+08 |
| G1T1Q2;P62160;G1TV62 | 9,31E+09 | 1,26E+10 | 1,62E+10 | 3,8E+09  | 7,23E+09 | 8E+09    |
| G1T1R0               | 1,8E+08  | 5,74E+08 | 5,04E+08 | 0        | 0        | 0        |
| G1T1S7               | 1,9E+08  | 3,1E+09  | 3,53E+09 | 3,29E+08 | 6,24E+08 | 8,39E+08 |
| G1T1T2               | 0        | 8,24E+08 | 8,27E+08 | 6,76E+08 | 8,22E+08 | 1,3E+09  |
| G1T1T4;U3KMG1        | 4,09E+09 | 6,15E+08 | 8,18E+08 | 6,01E+09 | 5,9E+09  | 4,23E+09 |
| G1T1T8               | 4,24E+09 | 8,97E+08 | 9,19E+08 | 9,37E+08 | 1,1E+09  | 5,66E+08 |

|                      |          |          |          |          |          |          |
|----------------------|----------|----------|----------|----------|----------|----------|
| G1T1U7;G1U5R9        | 6,15E+08 | 5,48E+09 | 3,93E+09 | 3,13E+08 | 2,77E+08 | 1,29E+08 |
| G1T1V9               | 2,75E+09 | 5,1E+09  | 4,37E+09 | 1,66E+10 | 1,95E+10 | 1,99E+10 |
| G1T1W6               | 7,87E+08 | 7,48E+08 | 6,88E+08 | 1,55E+09 | 1,63E+09 | 1,64E+09 |
| G1T1X2               | 4,52E+08 | 7,45E+09 | 7,05E+09 | 9,79E+08 | 1,12E+09 | 1,67E+09 |
| G1T1X7               | 0        | 0        | 2,76E+08 | 4,51E+08 | 2,46E+08 | 4,52E+08 |
| G1T1Y3;G1U4H2        | 79083000 | 0        | 0        | 75393000 | 0        | 0        |
| G1T217               | 2,89E+08 | 8,56E+08 | 1,63E+09 | 1,57E+08 | 1,81E+08 | 0        |
| G1T221               | 0        | 0        | 0        | 0        | 0        | 2,02E+08 |
| G1T235               | 5,18E+09 | 9,49E+09 | 1,23E+10 | 3,79E+09 | 3,34E+09 | 3,89E+09 |
| G1T237               | 5,58E+10 | 1,61E+10 | 1,7E+10  | 6,28E+10 | 5,14E+10 | 3,19E+10 |
| G1T239               | 6,04E+09 | 1,74E+09 | 1,88E+09 | 3,3E+09  | 2,49E+09 | 1,87E+09 |
| G1T242               | 1,11E+10 | 2,63E+09 | 2,3E+09  | 1,07E+10 | 1,4E+10  | 1,6E+10  |
| G1T243               | 7,86E+08 | 4,22E+09 | 3,45E+09 | 8,05E+09 | 1,23E+10 | 1,25E+10 |
| G1U8R0;G1T252;G1TZJ9 | 0        | 3,5E+08  | 2,33E+08 | 1,27E+08 | 0        | 1,46E+08 |
| G1T268               | 87424000 | 0        | 0        | 0        | 0        | 0        |
| G1T271               | 2,65E+08 | 1,08E+08 | 1,57E+08 | 0        | 0        | 0        |
| G1T275               | 1,98E+08 | 6,64E+08 | 6,34E+08 | 1,63E+08 | 2,71E+08 | 2,63E+08 |
| G1T276               | 5,84E+09 | 1,45E+09 | 1,07E+09 | 5,94E+09 | 3,79E+09 | 2,47E+09 |
| G1T277               | 8,71E+08 | 8,99E+08 | 1,01E+09 | 2,52E+08 | 1,99E+08 | 3,04E+08 |
| G1T284;G1TI10        | 4,94E+09 | 1,47E+09 | 1,59E+09 | 5,13E+09 | 3,81E+09 | 2,54E+09 |
| G1T288               | 0        | 0        | 0        | 0        | 0        | 1,9E+09  |
| G1T295;P04068        | 5,25E+09 | 1,16E+09 | 1,08E+09 | 1,82E+10 | 9,85E+09 | 9,13E+09 |
| G1T297               | 2,61E+09 | 3,62E+08 | 5,16E+08 | 4,46E+09 | 4,04E+09 | 2,8E+09  |
| G1T298               | 1,56E+08 | 0        | 0        | 0        | 0        | 0        |
| G1T2B8               | 1,35E+09 | 6,76E+08 | 6,64E+08 | 5,22E+09 | 5,84E+09 | 7,01E+09 |
| G1TBN0;G1T2C3        | 1,61E+09 | 1,07E+10 | 1,21E+10 | 9,55E+08 | 1,47E+09 | 9,15E+08 |
| G1T2C4               | 2,87E+09 | 1,73E+10 | 1,28E+10 | 1,01E+09 | 1,01E+09 | 1,78E+09 |
| G1T2D5;G1U1I6;G1TU02 | 8,7E+08  | 1,26E+09 | 1,28E+09 | 0        | 0        | 0        |
| G1T2E3               | 0        | 0        | 0        | 0        | 0        | 38236000 |
| G1T2E6               | 6,59E+09 | 3,01E+09 | 2,68E+09 | 1,11E+10 | 9,48E+09 | 1,15E+10 |
| G1T2F2;G1TNN8        | 3,13E+10 | 1,05E+10 | 8,96E+09 | 3,62E+10 | 3,04E+10 | 3,67E+10 |
| G1T2F4               | 3,77E+08 | 1,6E+08  | 0        | 1,3E+09  | 1,64E+09 | 1,22E+09 |
| O97755;G1T2F8        | 0        | 0        | 0        | 0        | 2E+08    | 0        |
| G1U5V2;G1T2G3        | 9,44E+08 | 5,22E+08 | 6,47E+08 | 8,46E+08 | 1,04E+09 | 1,61E+09 |
| G1T2G4;P83268        | 3,34E+09 | 7,33E+09 | 7,9E+09  | 7,22E+08 | 9,65E+08 | 8,95E+08 |
| G1T2G5               | 4,46E+08 | 0        | 0        | 0        | 0        | 0        |
| G1T2H9               | 0        | 0        | 0        | 9,99E+08 | 2,43E+08 | 1,16E+08 |
| G1T2I4               | 2,45E+09 | 5,66E+09 | 5,89E+09 | 2,67E+09 | 1,89E+09 | 1,14E+09 |
| G1T2I5               | 2,16E+10 | 4,19E+09 | 4,28E+09 | 7,24E+09 | 7,79E+09 | 7,26E+09 |
| G1T2I6               | 9,09E+08 | 1,82E+08 | 0        | 1,94E+09 | 1,94E+09 | 2,79E+09 |
| G1T2J0               | 1,89E+08 | 1,24E+08 | 1,3E+08  | 5,23E+08 | 2,37E+08 | 3,1E+08  |
| G1T2J6               | 9,68E+09 | 3,04E+09 | 2,39E+09 | 1,13E+10 | 8,35E+09 | 6,26E+09 |
| G1T2K2               | 4,46E+08 | 2,98E+09 | 3,21E+09 | 1,99E+08 | 1,89E+08 | 0        |
| G1T2K5               | 3,68E+10 | 8,79E+09 | 9,48E+09 | 5,57E+09 | 2,89E+09 | 2,87E+09 |
| G1T2K6               | 2,09E+09 | 7,51E+08 | 6,17E+08 | 5,51E+09 | 4,54E+09 | 3,65E+09 |
| G1T2L1               | 3,92E+09 | 6,46E+09 | 5,62E+09 | 1,7E+09  | 1,56E+09 | 1,26E+09 |
| G1T2L3;G1TLG9        | 8,85E+08 | 0        | 3,7E+08  | 4,88E+08 | 0        | 0        |
| G1T2M0               | 1,11E+09 | 6,4E+08  | 5,61E+08 | 1,18E+09 | 1,35E+09 | 1,11E+09 |
| G1T2M9;P36233        | 1,56E+10 | 5,35E+09 | 4,93E+09 | 5,34E+10 | 4,86E+10 | 5,87E+10 |
| G1T2N1               | 4,02E+08 | 1,55E+09 | 1,76E+09 | 1,12E+09 | 1,17E+09 | 9,68E+08 |

|                      |          |          |          |          |          |          |
|----------------------|----------|----------|----------|----------|----------|----------|
| G1T2N4               | 2,1E+08  | 1,18E+08 | 1,22E+08 | 1,09E+08 | 96541000 | 1,09E+08 |
| G1T2Q8;G1TII5        | 0        | 1,26E+09 | 1,25E+09 | 1,25E+09 | 1,13E+09 | 1,46E+09 |
| G1T2R2               | 9,05E+08 | 3,75E+08 | 4,51E+08 | 4,59E+09 | 2,97E+09 | 1,12E+09 |
| G1T2R3               | 0        | 0        | 1,65E+08 | 0        | 0        | 0        |
| G1T2S0               | 0        | 3,06E+09 | 1,83E+09 | 0        | 0        | 0        |
| G1T2S7               | 3,24E+09 | 4,78E+08 | 5,51E+08 | 1,17E+09 | 7,53E+08 | 1,22E+09 |
| G1T2T9               | 0        | 2,19E+08 | 1,62E+08 | 5,56E+08 | 3,32E+08 | 2,27E+08 |
| G1T2U6               | 5,84E+08 | 1,24E+09 | 1,24E+09 | 2,39E+09 | 1,81E+09 | 1,83E+09 |
| G1T2V0               | 2,86E+09 | 8,69E+08 | 9,61E+08 | 7,55E+08 | 1,22E+09 | 1,32E+09 |
| G1T2V2;G1TIJ8        | 2,76E+09 | 8,64E+09 | 9,6E+09  | 1,25E+09 | 1,62E+09 | 1,4E+09  |
| G1T2V6               | 1,87E+09 | 1,47E+09 | 1,81E+09 | 1,44E+09 | 1,95E+09 | 1,53E+09 |
| G1T2V8;G1TKQ5        | 7,38E+08 | 7,96E+08 | 6,87E+08 | 5,4E+08  | 8,85E+08 | 7,16E+08 |
| G1T2W1               | 2,19E+08 | 5,5E+08  | 8,24E+08 | 2,01E+08 | 2,06E+08 | 1,29E+08 |
| G1T2W4               | 1,59E+08 | 0        | 0        | 1,53E+08 | 0        | 1,89E+08 |
| G1T2Y2;U3KPC4        | 1,53E+08 | 2,84E+08 | 3,55E+08 | 1,97E+09 | 1,05E+09 | 1,4E+09  |
| G1T2Y3;G1SG03;U3KPJ5 | 1,04E+09 | 1,27E+09 | 9,43E+08 | 1,71E+09 | 1,53E+09 | 1,81E+09 |
| G1T2Y5               | 2,86E+10 | 1,29E+10 | 1,34E+10 | 2,78E+10 | 3,03E+10 | 3,74E+10 |
| G1T2Z5;Q28668        | 4,34E+08 | 5,95E+08 | 2,96E+08 | 1,28E+10 | 1,05E+10 | 1,34E+10 |
| G1T2Z8               | 1,26E+09 | 6,81E+09 | 8,66E+09 | 9,53E+08 | 1,41E+09 | 9,71E+08 |
| G1T301;G1TS96        | 8,03E+09 | 2,91E+09 | 2,56E+09 | 5,86E+09 | 6,65E+09 | 6,15E+09 |
| G1T302               | 4,53E+08 | 6,22E+08 | 5,77E+08 | 3,2E+09  | 3,23E+09 | 3,68E+09 |
| G1T310               | 6,12E+08 | 0        | 0        | 2,76E+09 | 2,29E+09 | 1,63E+09 |
| G1T312               | 1,23E+09 | 8,45E+08 | 5,8E+08  | 2,31E+09 | 2,34E+09 | 1,99E+09 |
| G1T326               | 3,42E+08 | 0        | 0        | 0        | 1,12E+08 | 0        |
| G1T329               | 1,21E+09 | 1,87E+09 | 1,38E+09 | 7,29E+09 | 6,97E+09 | 9,1E+09  |
| G1T330               | 1,54E+08 | 0        | 0        | 0        | 0        | 0        |
| G1T332;P12343        | 1,04E+09 | 4,7E+09  | 4,09E+09 | 2E+09    | 2,55E+09 | 2,35E+09 |
| G1T336;G1SVI0        | 5,5E+09  | 1,15E+10 | 1,21E+10 | 3,63E+09 | 4,64E+09 | 3,89E+09 |
| G1T338               | 2,17E+09 | 5,75E+08 | 5,1E+08  | 5,95E+08 | 1,2E+09  | 1,18E+09 |
| G1T346               | 2,12E+10 | 2,66E+10 | 2,61E+10 | 3,25E+10 | 3,57E+10 | 3,41E+10 |
| G1T359               | 5,71E+10 | 1,59E+10 | 1,39E+10 | 4,7E+10  | 5,55E+10 | 5,85E+10 |
| G1T361               | 2,6E+10  | 5,92E+09 | 5,66E+09 | 1,28E+10 | 1,3E+10  | 1,37E+10 |
| G1T362;U3KMK5        | 1,06E+09 | 2,54E+08 | 2,72E+08 | 8,68E+08 | 5,13E+08 | 3,6E+08  |
| G1T364               | 0        | 0        | 0        | 0        | 90047000 | 0        |
| G1T369               | 0        | 0        | 8,82E+08 | 0        | 0        | 0        |
| G1T370               | 0        | 0        | 0        | 0        | 0        | 1,85E+08 |
| G1T373               | 3,74E+08 | 4,57E+09 | 3,24E+09 | 2,12E+08 | 3,65E+08 | 2,07E+08 |
| G1T377               | 6,54E+08 | 0        | 1,54E+08 | 0        | 0        | 2,14E+08 |
| G1T379               | 1,84E+09 | 4,17E+08 | 2,79E+08 | 2,32E+09 | 1,44E+09 | 1,06E+09 |
| G1T387               | 6,43E+09 | 1,48E+10 | 1,47E+10 | 5,29E+09 | 5,79E+09 | 8E+09    |
| G1T398               | 8,43E+08 | 4,61E+09 | 4,82E+09 | 2,46E+09 | 3,63E+09 | 3,95E+09 |
| G1T3A2               | 1,39E+09 | 3,41E+08 | 3,65E+08 | 1,09E+09 | 1,12E+09 | 8,72E+08 |
| G1T3A6               | 8,96E+09 | 2,07E+09 | 1,88E+09 | 2,85E+09 | 2,33E+09 | 1,8E+09  |
| G1T3C3               | 0        | 3,98E+08 | 3,34E+08 | 0        | 0        | 0        |
| G1T3D1               | 1,14E+10 | 5,38E+09 | 5,12E+09 | 2,3E+10  | 2,18E+10 | 2,31E+10 |
| G1TLY5;G1T3D7        | 2,99E+08 | 1,67E+09 | 1,78E+09 | 8,65E+08 | 8,34E+08 | 5,5E+08  |
| G1T3D8;G1TS40;G1TPS1 | 2,43E+09 | 9,79E+09 | 9,64E+09 | 2,18E+09 | 1,97E+09 | 1,57E+09 |
| G1T3E1               | 0        | 3,3E+08  | 3,23E+08 | 0        | 0        | 0        |
| G1T3E2               | 5E+09    | 8,63E+08 | 8,68E+08 | 4,56E+09 | 3,42E+09 | 2,27E+09 |
| G1T3E6               | 5,49E+08 | 5,87E+08 | 5,7E+08  | 9,55E+08 | 7,8E+08  | 5,75E+08 |

|                      |          |          |          |          |          |          |
|----------------------|----------|----------|----------|----------|----------|----------|
| G1T3G8               | 4,35E+09 | 1,5E+09  | 1,52E+09 | 1,08E+09 | 1,35E+09 | 1,41E+09 |
| G1T3H3               | 1,13E+09 | 3,83E+08 | 2,42E+08 | 1,07E+09 | 8,03E+08 | 3,98E+08 |
| G1T3H5               | 2,9E+08  | 1,49E+09 | 1,75E+09 | 0        | 0        | 0        |
| U3KMH8;G1T3IO        | 0        | 6,46E+08 | 4,4E+08  | 0        | 0        | 2,5E+08  |
| G1T3I9               | 1,09E+09 | 4,08E+09 | 4,36E+09 | 7,86E+08 | 9,31E+08 | 9,42E+08 |
| G1T3K3               | 6,32E+08 | 2,99E+08 | 0        | 7,09E+08 | 4,55E+08 | 1,06E+09 |
| G1T3K7               | 0        | 0        | 0        | 2,61E+08 | 0        | 0        |
| G1T3K9               | 1,84E+08 | 0        | 0        | 4,42E+08 | 3,06E+08 | 5,38E+08 |
| G1T3L2               | 3,55E+08 | 3,3E+09  | 3,91E+09 | 3,32E+08 | 3,52E+08 | 3,45E+08 |
| G1T3L5;U3KM54        | 5,75E+08 | 5,14E+08 | 5,72E+08 | 1,88E+09 | 1,88E+09 | 2,23E+09 |
| G1T3L6               | 4,28E+08 | 0        | 0        | 5,65E+08 | 6,5E+08  | 1,36E+09 |
| G1T3M0               | 0        | 2,07E+08 | 0        | 0        | 0        | 0        |
| G1T3M3               | 1,91E+09 | 6,12E+08 | 6,79E+08 | 1,73E+09 | 1,33E+09 | 8,62E+08 |
| G1T3M5               | 2,06E+08 | 5,37E+08 | 3,95E+08 | 3,95E+08 | 2,73E+08 | 4,04E+08 |
| G1T3N1;G1U642;G1U5I3 | 1,61E+09 | 3,87E+08 | 3,09E+08 | 4,22E+08 | 0        | 0        |
| G1T3N8               | 3,09E+08 | 1,21E+09 | 1,35E+09 | 5,66E+08 | 4,11E+08 | 3,48E+08 |
| G1T3P1;U3KNW1        | 1,88E+09 | 8,27E+09 | 9,63E+09 | 5,23E+08 | 6,55E+08 | 4,32E+08 |
| G1T3Q2               | 5,44E+08 | 3,82E+08 | 4,05E+08 | 3,19E+09 | 3,17E+09 | 3,75E+09 |
| G1T3R1               | 4,68E+09 | 1,86E+09 | 2,28E+09 | 3,13E+09 | 3,52E+09 | 5,12E+09 |
| G1T3R5               | 3,94E+09 | 5,63E+08 | 6,86E+08 | 2,18E+09 | 1,61E+09 | 2,61E+09 |
| G1T3S1               | 6,49E+09 | 1,23E+10 | 1,41E+10 | 5,1E+09  | 5,28E+09 | 5,31E+09 |
| G1T3S4;U3KN23        | 1,01E+09 | 1,39E+08 | 1,74E+08 | 4,89E+08 | 3,3E+08  | 8,51E+08 |
| G1T3U1               | 2,23E+09 | 1,51E+09 | 1,22E+09 | 2,7E+09  | 3,66E+09 | 4,7E+09  |
| G1T3U3               | 2,49E+08 | 0        | 0        | 0        | 0        | 0        |
| G1T3U5               | 0        | 0        | 0        | 4,7E+08  | 6,13E+08 | 1,19E+09 |
| G1T3V0               | 5,01E+09 | 1,55E+10 | 1,75E+10 | 5,18E+09 | 5,38E+09 | 5,79E+09 |
| G1T3V1;G1TF21;G1TAT7 | 0        | 0        | 0        | 0        | 3,21E+08 | 0        |
| G1T3V2;G1TRF1;G1TGC4 | 5,09E+09 | 1,33E+10 | 1,23E+10 | 1,35E+10 | 1,53E+10 | 2,04E+10 |
| G1T3V5               | 5,39E+09 | 6,04E+09 | 6,42E+09 | 1,85E+10 | 1,88E+10 | 2E+10    |
| G1T3W1               | 0        | 2,46E+08 | 0        | 0        | 0        | 0        |
| G1T3W6               | 1,21E+09 | 1,59E+09 | 1,71E+09 | 2,61E+09 | 2,67E+09 | 3,04E+09 |
| G1T3W8               | 0        | 2,34E+08 | 3,27E+08 | 3,19E+08 | 0        | 3,42E+08 |
| G1T3W9               | 6,66E+08 | 1,89E+08 | 3,25E+08 | 1,82E+08 | 0        | 0        |
| G1T3Y0               | 5,87E+09 | 8,54E+09 | 1,09E+10 | 1,21E+09 | 1,6E+09  | 1,63E+09 |
| G1T3Y8               | 3,75E+11 | 1,41E+11 | 1,50E+11 | 1,00E+11 | 1,24E+11 | 1,52E+11 |
| G1T3Z2               | 7,49E+08 | 6,63E+09 | 8,54E+09 | 8,74E+08 | 1,78E+09 | 2,02E+09 |
| G1T3Z5               | 0        | 1,49E+09 | 1,39E+09 | 0        | 0        | 0        |
| G1T3Z6               | 53131000 | 4,77E+08 | 2,73E+08 | 1,75E+08 | 1,68E+08 | 1,33E+08 |
| G1T419               | 2,64E+09 | 2,36E+08 | 87505000 | 4,28E+08 | 3,86E+08 | 0        |
| G1T432;G1TX42        | 8,48E+09 | 2,67E+10 | 3,03E+10 | 3,29E+09 | 4,36E+09 | 4,39E+09 |
| G1T433               | 0        | 0        | 0        | 0        | 0        | 42709000 |
| G1T434               | 2,48E+09 | 1,65E+09 | 1,57E+09 | 5,75E+09 | 6,83E+09 | 8,18E+09 |
| G1T435               | 3,67E+08 | 0        | 0        | 4,34E+08 | 5E+08    | 4,62E+08 |
| G1T437               | 3,47E+08 | 2,5E+08  | 0        | 4,33E+08 | 4,63E+08 | 5,64E+08 |
| G1T442               | 0        | 3,57E+08 | 3,94E+08 | 0        | 0        | 0        |
| G1T443               | 0        | 0        | 0        | 1,99E+08 | 0        | 0        |
| G1T444               | 5,63E+08 | 1,12E+08 | 1,28E+08 | 5,34E+08 | 6,01E+08 | 8,01E+08 |
| G1T450               | 0        | 2,5E+08  | 1,31E+08 | 0        | 0        | 0        |
| G1T458               | 1,85E+08 | 0        | 0        | 0        | 0        | 0        |
| G1T461               | 0        | 2,4E+09  | 2,54E+09 | 6,03E+08 | 9,35E+08 | 9,33E+08 |

|                             |          |          |          |          |          |          |
|-----------------------------|----------|----------|----------|----------|----------|----------|
| G1T464                      | 0        | 2,75E+09 | 3,29E+09 | 0        | 2,76E+08 | 0        |
| G1T466                      | 0        | 0        | 1,86E+08 | 1,24E+08 | 0        | 0        |
| G1T473                      | 1,09E+09 | 2,38E+09 | 2,78E+09 | 9,21E+08 | 7,98E+08 | 9,21E+08 |
| G1T489                      | 4,19E+08 | 2,22E+09 | 2,14E+09 | 6,19E+08 | 5,72E+08 | 6,61E+08 |
| G1T495                      | 0        | 0        | 1,8E+08  | 0        | 0        | 0        |
| Q08863;G1T4A7;Q08862        | 0        | 0        | 0        | 2,11E+08 | 0        | 0        |
| G1T4C9                      | 1,87E+09 | 5,23E+08 | 1,96E+08 | 1,59E+10 | 1,46E+10 | 2,25E+10 |
| G1T4D2                      | 3,18E+10 | 5,55E+09 | 5,36E+09 | 7,62E+09 | 5,89E+09 | 5,56E+09 |
| G1T4D3;G1TQB2               | 6,18E+08 | 0        | 89346000 | 3,27E+08 | 6,26E+08 | 5,88E+08 |
| G1T4D8;G1U2R3;G1TPZ2        | 1,11E+10 | 3,24E+09 | 3,28E+09 | 1,09E+10 | 1,42E+10 | 1,65E+10 |
| G1T4E1                      | 3,57E+08 | 2E+08    | 0        | 7,79E+08 | 4,89E+08 | 3,64E+08 |
| G1T4E7                      | 1,48E+09 | 4,41E+08 | 5,26E+08 | 2,59E+09 | 2,12E+09 | 1,74E+09 |
| G1T4E8                      | 1,06E+09 | 4,35E+08 | 3,74E+08 | 3,59E+08 | 5,72E+08 | 9,94E+08 |
| G1T4H3                      | 6,48E+10 | 2,26E+10 | 2,24E+10 | 9,97E+10 | 9,78E+10 | 1,46E+11 |
| G1T4I7                      | 0        | 3,33E+08 | 3,39E+08 | 0        | 0        | 0        |
| G1T4J4                      | 4,56E+09 | 2,06E+10 | 1,88E+10 | 2,67E+09 | 3,77E+09 | 4,15E+09 |
| G1T4K5                      | 2,1E+08  | 3,55E+09 | 2,92E+09 | 5,48E+08 | 1,1E+09  | 9,97E+08 |
| G1T4K9                      | 1,3E+09  | 6,24E+08 | 7,57E+08 | 6,04E+08 | 5,19E+08 | 5,78E+08 |
| G1T4L4;G1T3G0               | 2,31E+08 | 1,02E+08 | 0        | 3,2E+08  | 3,28E+08 | 1,82E+08 |
| G1T4L8                      | 7,5E+08  | 3,62E+08 | 0        | 0        | 0        | 0        |
| G1T4L9                      | 1,46E+09 | 1,36E+09 | 1,11E+09 | 4,09E+09 | 3,94E+09 | 4,55E+09 |
| G1T4M1                      | 9,34E+08 | 4,26E+08 | 5,2E+08  | 3,56E+08 | 3,63E+08 | 2,68E+08 |
| G1T4M2;G1SEM2               | 7,97E+08 | 1,74E+08 | 1,44E+08 | 3,1E+08  | 1,17E+08 | 1,09E+08 |
| U3KN47;G1T4N4;G1T575        | 3,15E+08 | 6,77E+08 | 8,26E+08 | 1,85E+08 | 1,15E+08 | 0        |
| G1T4P7                      | 0        | 0        | 0        | 0        | 9547500  | 0        |
| G1T4P8                      | 8,01E+08 | 5,03E+09 | 4,77E+09 | 1E+09    | 4,36E+08 | 4,1E+08  |
| G1T4Q8                      | 2,43E+08 | 8,35E+08 | 9,19E+08 | 1,5E+08  | 0        | 0        |
| G1T4Q9                      | 3,01E+09 | 3,82E+09 | 3,91E+09 | 2,16E+09 | 1,59E+09 | 1,42E+09 |
| G1T4S1                      | 89052000 | 0        | 0        | 0        | 0        | 0        |
| G1T4S5                      | 0        | 0        | 0        | 1,47E+09 | 7,93E+08 | 8,17E+08 |
| G1T4T0                      | 0        | 0        | 1,61E+08 | 0        | 0        | 0        |
| G1T4T3                      | 6,49E+09 | 2,26E+09 | 2,67E+09 | 6,91E+09 | 5,43E+09 | 8,06E+09 |
| G1T4T5                      | 0        | 2,4E+08  | 0        | 7,08E+08 | 1,06E+09 | 1,16E+09 |
| G1T4V2                      | 6,15E+09 | 1,62E+09 | 1,43E+09 | 1,18E+10 | 1,02E+10 | 6,84E+09 |
| G1T4V9                      | 0        | 0        | 7,82E+08 | 0        | 0        | 0        |
| G1T4W0;G1TXV3               | 3,64E+08 | 3,81E+08 | 3,02E+08 | 0        | 0        | 0        |
| G1T4W2                      | 0        | 1,82E+08 | 0        | 0        | 0        | 0        |
| G1T4W4                      | 4,47E+08 | 0        | 0        | 5,84E+08 | 1,53E+09 | 4,95E+08 |
| G1T4W5                      | 3,6E+08  | 3,53E+08 | 2,85E+08 | 9,83E+08 | 7,36E+08 | 6,93E+08 |
| G1T4X8                      | 4,16E+09 | 3,91E+09 | 4,1E+09  | 1,71E+09 | 1,28E+09 | 1,79E+09 |
| G1T4Y7                      | 5,8E+08  | 5,23E+09 | 5,47E+09 | 4,26E+08 | 9,66E+08 | 8,92E+08 |
| G1T4Z1;G1TD94;G1T5U5;G1SIU4 | 4,05E+10 | 1,19E+10 | 1,41E+10 | 1,69E+11 | 1,70E+11 | 1,95E+11 |
| G1T4Z2                      | 1,2E+09  | 3,63E+09 | 3,78E+09 | 1,49E+09 | 1,23E+09 | 7,22E+08 |
| G1T4Z7                      | 0        | 0        | 0        | 0        | 0        | 1,36E+08 |
| G1T501                      | 9,21E+08 | 1,03E+09 | 9,73E+08 | 3,81E+09 | 3,04E+09 | 2,28E+09 |
| G1T508                      | 2,19E+08 | 0        | 0        | 0        | 0        | 0        |
| G1T510                      | 1,09E+09 | 4,88E+08 | 4,91E+08 | 4E+08    | 5,8E+08  | 4,67E+08 |
| G1T511                      | 2,03E+09 | 1,56E+09 | 1,57E+09 | 2,19E+09 | 1,81E+09 | 2,4E+09  |
| G1T512                      | 1,03E+08 | 0        | 0        | 2,18E+08 | 0        | 1,38E+08 |
| G1T519                      | 4,86E+09 | 8,55E+09 | 8,17E+09 | 2,09E+09 | 2,46E+09 | 2,27E+09 |

|                      |          |          |          |          |          |          |
|----------------------|----------|----------|----------|----------|----------|----------|
| G1T520               | 3,04E+08 | 8,49E+08 | 9,36E+08 | 4,3E+08  | 6,45E+08 | 4,66E+08 |
| G1T521               | 3,2E+08  | 0        | 0        | 83963000 | 80240000 | 0        |
| G1T524;U3KPH3        | 1,77E+11 | 7,42E+10 | 6,24E+10 | 1,94E+11 | 1,59E+11 | 9,52E+10 |
| G1T530               | 1,49E+08 | 1,51E+09 | 1,46E+09 | 1,97E+08 | 2,22E+08 | 2,48E+08 |
| G1T534               | 2,87E+08 | 7,03E+08 | 6,04E+08 | 0        | 0        | 1,18E+08 |
| G1T536;G1TM49;G1SSJ8 | 2,73E+09 | 1,15E+09 | 1,02E+09 | 2,17E+09 | 2E+09    | 1,97E+09 |
| G1T545               | 1,08E+09 | 5,25E+09 | 5,87E+09 | 1,43E+09 | 2,63E+09 | 2,58E+09 |
| G1T548               | 1,99E+09 | 4,91E+08 | 3,39E+08 | 1,2E+09  | 9,82E+08 | 1,03E+09 |
| G1T550               | 3,78E+09 | 1,77E+09 | 1,91E+09 | 3,89E+09 | 3,91E+09 | 2,51E+09 |
| G1T555               | 3,67E+09 | 1,08E+09 | 8,93E+08 | 2,26E+09 | 2,18E+09 | 2,31E+09 |
| G1T567;G1TTV0;G1TQZ8 | 1,01E+10 | 6,83E+09 | 6,61E+09 | 1,58E+10 | 1,58E+10 | 1,59E+10 |
| G1T568               | 1,12E+09 | 2,08E+09 | 2,41E+09 | 1,96E+09 | 1,63E+09 | 1,33E+09 |
| G1T573               | 0        | 0        | 44419000 | 0        | 0        | 0        |
| G1T578               | 1,42E+09 | 4,16E+08 | 4,55E+08 | 1,47E+09 | 1,4E+09  | 1,5E+09  |
| G1T579               | 2,37E+08 | 1,85E+08 | 0        | 4,85E+08 | 0        | 1,88E+08 |
| G1T580               | 3,67E+08 | 2,59E+08 | 2,29E+08 | 2,88E+08 | 4,98E+08 | 6,23E+08 |
| G1T586;G1TWH7        | 8,82E+10 | 5,39E+10 | 5,38E+10 | 4,74E+10 | 4,79E+10 | 6,31E+10 |
| G1T593               | 1,02E+09 | 3,14E+09 | 3,24E+09 | 4,68E+08 | 5,07E+08 | 4,7E+08  |
| G1T594               | 2,77E+09 | 1,05E+09 | 5,52E+08 | 1E+10    | 1,03E+10 | 1,22E+10 |
| G1T5A0               | 7,61E+08 | 7,55E+09 | 9,71E+09 | 4,81E+08 | 3,49E+08 | 7,28E+08 |
| G1T5A2               | 3,2E+09  | 7,79E+08 | 9,3E+08  | 5,12E+08 | 4,54E+08 | 5,5E+08  |
| G1T5A5               | 3,09E+08 | 43956000 | 43522000 | 53921000 | 67294000 | 43348000 |
| G1T5A9               | 2,59E+08 | 0        | 0        | 0        | 0        | 0        |
| G1T5B0               | 7,64E+08 | 2,78E+08 | 2,81E+08 | 3,64E+08 | 3,13E+08 | 3,13E+08 |
| G1T5C5               | 9,46E+09 | 3,93E+09 | 3,42E+09 | 2,21E+10 | 2,41E+10 | 2,01E+10 |
| G1T5D2               | 2,14E+08 | 1,24E+09 | 1,35E+09 | 5,15E+08 | 6,91E+08 | 6,65E+08 |
| G1T5E2               | 6,91E+08 | 1,08E+09 | 1,19E+09 | 1,56E+09 | 2,26E+09 | 3,24E+09 |
| G1T5E6               | 1,51E+09 | 3,63E+09 | 3,47E+09 | 1,01E+09 | 1,67E+09 | 1,49E+09 |
| G1T5G8               | 2,46E+08 | 0        | 0        | 98759000 | 0        | 0        |
| G1T5H0               | 0        | 0        | 0        | 5,07E+08 | 2,83E+08 | 0        |
| G1T5H2               | 0        | 0        | 0        | 0        | 0        | 3,48E+08 |
| G1T5H5               | 1,31E+09 | 3,07E+08 | 4,2E+08  | 4,48E+08 | 1,23E+09 | 2,96E+08 |
| G1T5H7               | 3,89E+08 | 8,07E+08 | 1,24E+09 | 0        | 0        | 0        |
| G1T5H8               | 1,64E+09 | 6,72E+09 | 8,59E+09 | 6,52E+08 | 1,27E+09 | 1,35E+09 |
| G1T5I3               | 1,22E+09 | 3,57E+08 | 3,59E+08 | 1,53E+09 | 1,01E+09 | 3,99E+08 |
| G1T5I9               | 4,53E+08 | 1,86E+09 | 2,08E+09 | 3,16E+09 | 2,8E+09  | 3,8E+09  |
| G1T5J8               | 2,29E+08 | 3,17E+08 | 4,06E+08 | 0        | 0        | 0        |
| G1T5J9               | 1,43E+10 | 2,74E+09 | 2,87E+09 | 1,2E+10  | 9,51E+09 | 1,09E+10 |
| G1T5L3               | 1,21E+09 | 4,1E+08  | 2,93E+08 | 1,43E+09 | 7,19E+08 | 9,33E+08 |
| G1T5M0               | 9,76E+10 | 3,14E+10 | 3,05E+10 | 4,76E+10 | 4,91E+10 | 5,36E+10 |
| G1T5N5               | 2,5E+10  | 6,49E+09 | 6,79E+09 | 6,67E+09 | 6,61E+09 | 7,96E+09 |
| G1T5N7;U3KM88        | 5,1E+09  | 1,55E+09 | 1,6E+09  | 1,82E+09 | 2,58E+09 | 1,84E+09 |
| G1U207;G1T5Q8        | 3,2E+09  | 7,93E+08 | 6,6E+08  | 1,96E+09 | 2,46E+09 | 2,4E+09  |
| G1T5R3               | 37961000 | 59051000 | 64392000 | 1,53E+08 | 40305000 | 45673000 |
| G1T5R7               | 1,95E+08 | 0        | 0        | 0        | 0        | 0        |
| G1T5S9               | 2,8E+09  | 3,44E+08 | 2,65E+08 | 4,96E+09 | 3,41E+09 | 3,82E+09 |
| G1T5T8               | 2E+08    | 8,71E+09 | 8,58E+09 | 6,65E+08 | 5,62E+08 | 5,52E+08 |
| G1T5U2;P47814        | 2,36E+08 | 5,95E+08 | 1,05E+09 | 0        | 2,65E+08 | 2,34E+08 |
| G1T5V3               | 7,73E+09 | 2,83E+09 | 3,35E+09 | 1,29E+10 | 1,12E+10 | 7,41E+09 |
| G1T5V8               | 0        | 3,52E+08 | 4,09E+08 | 0        | 0        | 0        |



|                      |          |          |          |          |          |          |
|----------------------|----------|----------|----------|----------|----------|----------|
| G1T5W4;U3KM39        | 7,29E+09 | 2,41E+09 | 2,53E+09 | 4,27E+09 | 4,18E+09 | 3,99E+09 |
| G1T5W7               | 8,49E+08 | 1,69E+09 | 1,65E+09 | 5,39E+08 | 0        | 0        |
| G1T5X6;U3KPQ8        | 2,48E+09 | 1,21E+09 | 9,86E+08 | 1,79E+09 | 1,95E+09 | 2,35E+09 |
| G1T5Y1               | 2,18E+08 | 7,74E+08 | 1,04E+09 | 3,22E+08 | 3,19E+08 | 2,92E+08 |
| G1T752;G1T5Z3        | 0        | 3,3E+08  | 3E+08    | 0        | 0        | 0        |
| G1T5Z7;G1T4J7;G1T2T1 | 2,13E+08 | 1,1E+09  | 1,5E+09  | 3,95E+08 | 3,37E+08 | 2,84E+08 |
| G1T601               | 2,13E+09 | 1,22E+09 | 9,42E+08 | 2,75E+09 | 2,76E+09 | 4,11E+09 |
| G1T616               | 4,87E+08 | 1,87E+09 | 1,9E+09  | 1,15E+09 | 1,14E+09 | 1,01E+09 |
| G1U662;G1T617        | 2,12E+09 | 9,03E+08 | 1,08E+09 | 1,7E+09  | 1,47E+09 | 1,55E+09 |
| G1T638;G1TUL0        | 3,31E+08 | 0        | 0        | 0        | 0        | 0        |
| G1T639               | 0        | 0        | 0        | 4,87E+08 | 0        | 0        |
| G1T641               | 1,2E+09  | 3,68E+08 | 0        | 5,51E+08 | 3,05E+08 | 2,8E+08  |
| G1T643               | 1,27E+08 | 3,28E+08 | 2,22E+08 | 0        | 0        | 0        |
| G1T645               | 1,15E+09 | 2,14E+08 | 2,99E+08 | 1,32E+09 | 7,91E+08 | 8,18E+08 |
| G1T647               | 3,36E+08 | 9,03E+08 | 4,24E+08 | 0        | 0        | 0        |
| G1T650               | 6,53E+08 | 1,87E+08 | 0        | 2,33E+08 | 2,7E+08  | 2,31E+08 |
| G1T652;G1U8Q8;P79226 | 0        | 9,88E+08 | 9,68E+08 | 9,99E+08 | 5,86E+09 | 1,9E+09  |
| G1T657;G1U371;G1U208 | 8,76E+09 | 4,97E+09 | 5,54E+09 | 6,67E+09 | 7,58E+09 | 9,1E+09  |
| G1T658               | 0        | 0        | 0        | 0        | 0        | 3,03E+08 |
| G1T659               | 71728000 | 1,84E+08 | 4,05E+08 | 58572000 | 0        | 0        |
| G1T661               | 4,43E+09 | 1,08E+10 | 1,08E+10 | 3,41E+09 | 4,22E+09 | 4,7E+09  |
| G1T667               | 1,24E+08 | 3,28E+08 | 0        | 0        | 0        | 1,57E+08 |
| G1T670               | 4,55E+08 | 1,05E+09 | 1,56E+09 | 0        | 5,04E+08 | 6,26E+08 |
| G1T671               | 2,42E+09 | 1,25E+10 | 9,26E+09 | 8,24E+08 | 1,05E+09 | 8,41E+08 |
| G1T673               | 1,35E+09 | 2,63E+08 | 2,21E+08 | 2,15E+08 | 3,33E+08 | 2,47E+08 |
| G1T678               | 0        | 1,39E+09 | 9,72E+08 | 0        | 0        | 0        |
| G1T688               | 9,81E+08 | 1,68E+08 | 2,18E+08 | 4,19E+08 | 4,17E+08 | 3,54E+08 |
| G1T695               | 8,04E+09 | 2,36E+10 | 2,3E+10  | 2,55E+09 | 3,53E+09 | 3,49E+09 |
| G1T6A3               | 2,71E+09 | 1,25E+09 | 1,04E+09 | 2,5E+09  | 3,59E+09 | 5,14E+09 |
| G1T6B3               | 2,37E+09 | 1,15E+10 | 1,14E+10 | 9E+08    | 1,08E+09 | 8,48E+08 |
| G1T6C0               | 1,79E+09 | 8,04E+08 | 6,72E+08 | 1,96E+09 | 1,62E+09 | 8,46E+08 |
| G1T6D1;G1TPF6        | 3,41E+09 | 1,83E+10 | 1,66E+10 | 4,51E+09 | 4,4E+09  | 4,58E+09 |
| G1T6D4               | 2,25E+09 | 2,43E+09 | 2,59E+09 | 1,16E+09 | 8,77E+08 | 9,14E+08 |
| G1T6E6               | 72863000 | 0        | 0        | 0        | 0        | 0        |
| G1T6E9               | 8,24E+08 | 2,06E+08 | 2,75E+08 | 1,78E+09 | 1,88E+09 | 1,72E+09 |
| G1T6G1               | 8,78E+08 | 0        | 5,22E+08 | 6,9E+08  | 5,82E+08 | 7,4E+08  |
| G1T6I0;P80456        | 0        | 92703000 | 63631000 | 0        | 0        | 0        |
| G1T6I6               | 4,14E+10 | 9,84E+09 | 9,11E+09 | 2,14E+10 | 1,62E+10 | 1,66E+10 |
| G1T6J2;G1U756        | 1,38E+09 | 2,9E+08  | 3,23E+08 | 1,41E+09 | 8,67E+08 | 3,28E+09 |
| G1T6L0               | 4,11E+08 | 0        | 0        | 0        | 0        | 0        |
| G1T6L5               | 6,88E+08 | 3,27E+09 | 3,41E+09 | 1,5E+09  | 1,8E+09  | 1,91E+09 |
| G1T6L7               | 7,26E+09 | 3,17E+09 | 3E+09    | 8E+09    | 1,11E+10 | 1,16E+10 |
| G1T6M0               | 1,48E+09 | 5,59E+08 | 2,94E+08 | 2,48E+08 | 1,84E+08 | 1,42E+08 |
| G1T6M1               | 5,78E+08 | 0        | 0        | 3,37E+08 | 3,38E+08 | 3,79E+08 |
| G1T6M2;G1TWM4        | 1,24E+09 | 3,93E+08 | 4,23E+08 | 1,65E+09 | 1,28E+09 | 8,12E+08 |
| G1T6N0               | 3,48E+08 | 0        | 0        | 2,86E+08 | 0        | 0        |
| G1T6N3               | 3,17E+09 | 1,56E+09 | 1,1E+09  | 4,26E+08 | 7,09E+08 | 7,05E+08 |
| G1T6N7               | 2,76E+09 | 7,19E+08 | 8,22E+08 | 1,71E+09 | 2,48E+09 | 2,64E+09 |
| G1T6P5               | 1,52E+09 | 3,72E+08 | 3,85E+08 | 5,26E+08 | 4,18E+08 | 0        |
| P25915;G1T6Q8        | 1,46E+10 | 1,99E+09 | 2,2E+09  | 2,5E+08  | 1,31E+08 | 1,96E+08 |

|                      |          |          |          |          |          |          |
|----------------------|----------|----------|----------|----------|----------|----------|
| G1T6Q9               | 2,05E+09 | 5,92E+08 | 5,81E+08 | 2,89E+09 | 3,94E+09 | 3,74E+09 |
| G1T6S0;G1SV73        | 1,41E+08 | 7,08E+08 | 8,85E+08 | 2,58E+08 | 2,02E+08 | 2,75E+08 |
| G1T6S2               | 0        | 3,64E+08 | 2,26E+08 | 1,24E+08 | 0        | 1,01E+08 |
| G1T6S6;G1T1E8        | 1,26E+09 | 4,6E+08  | 5,06E+08 | 3,68E+08 | 5,81E+08 | 1,22E+09 |
| G1T6S9;U3KNM6        | 0        | 5,59E+08 | 5,05E+08 | 2,96E+08 | 4,72E+08 | 4,1E+08  |
| G1T6T0               | 21993000 | 0        | 0        | 0        | 0        | 0        |
| G1T6T5               | 0        | 4,43E+08 | 1,21E+09 | 2,19E+08 | 0        | 0        |
| G1T6T7               | 2,87E+08 | 0        | 0        | 0        | 0        | 0        |
| G1T6T8               | 1,69E+09 | 9,6E+08  | 6,3E+08  | 1,85E+09 | 1,44E+09 | 1,12E+09 |
| G1T6U1               | 4,89E+08 | 3,01E+08 | 5,2E+08  | 2,01E+09 | 1,23E+09 | 6,81E+08 |
| G1T6U3               | 61765000 | 0        | 0        | 99387000 | 84494000 | 0        |
| G1T6U4               | 4,47E+08 | 67451000 | 78974000 | 1,04E+08 | 71855000 | 53432000 |
| G1T6U5               | 0        | 7,54E+08 | 8,04E+08 | 0        | 0        | 0        |
| G1T6V7               | 0        | 0        | 0        | 0        | 0        | 56272000 |
| G1T6W3               | 0        | 0        | 0        | 0        | 0        | 3,69E+09 |
| G1T6W4;O97529;U3KNG8 | 2,62E+08 | 3,75E+08 | 6,46E+08 | 2,19E+08 | 0        | 0        |
| G1T6W7               | 6,84E+09 | 2,78E+09 | 2,33E+09 | 4,68E+09 | 4,94E+09 | 4,09E+09 |
| G1T6W9               | 0        | 3,04E+08 | 0        | 0        | 0        | 0        |
| G1T701               | 5,18E+09 | 1,04E+09 | 9,59E+08 | 3,21E+09 | 2,9E+09  | 2,32E+09 |
| G1T703               | 1,04E+09 | 0        | 9,8E+08  | 9,53E+08 | 6,52E+08 | 0        |
| G1T705               | 6,4E+09  | 1,21E+09 | 1,03E+09 | 4,37E+09 | 2,4E+09  | 1,99E+09 |
| G1T714               | 8,91E+08 | 2,3E+08  | 1,5E+08  | 4,78E+08 | 4,7E+08  | 3,58E+08 |
| G1T720               | 1,59E+09 | 5,79E+08 | 5,4E+08  | 3,63E+09 | 2,52E+09 | 1,69E+09 |
| G1T726               | 2,25E+10 | 6,36E+09 | 5,07E+09 | 1E+10    | 9,3E+09  | 8,16E+09 |
| G1T736               | 0        | 0        | 0        | 1,57E+08 | 1,73E+08 | 2,35E+08 |
| G1T748               | 3,76E+08 | 1,3E+09  | 1,34E+09 | 0        | 1,35E+08 | 0        |
| G1T753               | 0        | 1,63E+08 | 0        | 0        | 1,02E+08 | 0        |
| G1T754               | 0        | 4,31E+08 | 0        | 0        | 0        | 0        |
| G1T756               | 0        | 0        | 0        | 0        | 5,2E+08  | 3,83E+08 |
| U3KMH9;G1T765        | 1,79E+11 | 4,72E+10 | 5,38E+10 | 5,39E+10 | 5,6E+10  | 5,43E+10 |
| G1T781;U3KP89        | 0        | 0        | 0        | 3E+08    | 2,91E+08 | 3,19E+08 |
| G1T782               | 1,33E+09 | 2,08E+08 | 2,78E+08 | 2,27E+08 | 2,56E+08 | 1,75E+08 |
| G1T786               | 0        | 0        | 2,08E+08 | 1,95E+08 | 2,01E+08 | 2,05E+08 |
| G1T792               | 4,66E+08 | 1,87E+08 | 1,68E+08 | 5,91E+08 | 3,04E+08 | 2,93E+08 |
| G1T798               | 3,93E+08 | 3,36E+08 | 2,14E+08 | 9,61E+08 | 1,21E+09 | 1,63E+09 |
| G1T7B1               | 1,51E+08 | 2,95E+08 | 3,72E+08 | 97661000 | 1,16E+08 | 1,81E+08 |
| G1T7B6               | 2,31E+09 | 7,14E+08 | 7,18E+08 | 3,78E+08 | 0        | 0        |
| G1T7C0               | 4,47E+09 | 1,1E+09  | 1,13E+09 | 6,42E+09 | 8,76E+09 | 9,35E+09 |
| G1T7C1               | 1,27E+09 | 4,86E+08 | 6,13E+08 | 7,85E+08 | 1,03E+09 | 9,98E+08 |
| G1T7D0               | 3,22E+08 | 4,71E+09 | 4,6E+09  | 2,4E+09  | 2,8E+09  | 2,08E+09 |
| G1T7D1;G1TQ05        | 3,28E+10 | 5,14E+10 | 4,72E+10 | 6,44E+10 | 4,97E+10 | 5,44E+10 |
| G1T7D7               | 1,01E+09 | 2,36E+09 | 7,43E+08 | 2,2E+09  | 2,35E+09 | 2,43E+09 |
| G1T7D9;G1U6L5        | 0        | 1,39E+08 | 0        | 0        | 0        | 0        |
| G1T7E3               | 4,75E+09 | 4,69E+09 | 6,49E+09 | 0        | 0        | 0        |
| G1T7E6               | 0        | 0        | 0        | 3,82E+08 | 3,67E+08 | 5,16E+08 |
| G1U155;G1TP83;G1TJC1 | 6,83E+09 | 6,17E+09 | 5,03E+09 | 1,28E+10 | 1,3E+10  | 1,23E+10 |
| G1T116;G1T7G2        | 1,84E+08 | 0        | 0        | 0        | 1,41E+08 | 3,18E+08 |
| G1T7G3               | 3,41E+08 | 0        | 1,31E+08 | 1,39E+08 | 1,35E+08 | 1,13E+08 |
| G1T7G6               | 1,13E+08 | 1,43E+08 | 1,57E+08 | 0        | 0        | 0        |
| G1T7H0               | 7,33E+10 | 4,4E+10  | 4,45E+10 | 6,7E+10  | 4,93E+10 | 6,14E+10 |

|                      |          |          |          |          |          |          |
|----------------------|----------|----------|----------|----------|----------|----------|
| G1T7H3               | 1,46E+09 | 6,12E+08 | 5,55E+08 | 2,64E+09 | 3,83E+09 | 4,65E+09 |
| G1T7H4               | 1,91E+08 | 0        | 74292000 | 0        | 0        | 0        |
| G1T7H6               | 1,25E+08 | 0        | 0        | 1,5E+09  | 1,69E+09 | 1,93E+09 |
| G1T7I0               | 16415000 | 0        | 0        | 0        | 0        | 0        |
| G1T7I3               | 2,08E+09 | 5,25E+09 | 7,29E+09 | 0        | 1,33E+09 | 2,41E+09 |
| G1T7I4               | 2,81E+09 | 6,64E+09 | 6,83E+09 | 4,06E+09 | 3,42E+09 | 1,57E+09 |
| G1T7I8               | 0        | 1,98E+08 | 2,12E+08 | 0        | 0        | 0        |
| G1T7J5               | 3,36E+09 | 9,27E+08 | 7E+08    | 2,39E+09 | 2,61E+09 | 3,18E+09 |
| G1T7J9               | 2,72E+08 | 93443000 | 0        | 4,63E+08 | 3,59E+08 | 1,27E+08 |
| G1T7L0               | 2,59E+09 | 1,67E+09 | 2,14E+09 | 1,67E+09 | 2,11E+09 | 1,98E+09 |
| G1T7L5               | 4,21E+08 | 2,81E+09 | 2,03E+09 | 5,88E+08 | 6,83E+08 | 6,23E+08 |
| G1T7L6               | 91292000 | 0        | 0        | 0        | 0        | 0        |
| G1T7L7               | 2,43E+08 | 0        | 87841000 | 3,38E+08 | 1,58E+08 | 1,93E+08 |
| G1T7L9;G1U4R9        | 3,34E+08 | 1,11E+09 | 1,42E+09 | 0        | 0        | 0        |
| G1TWJ2;G1T7M0        | 0        | 0        | 0        | 0        | 0        | 52541000 |
| G1T7M3               | 0        | 5,5E+08  | 5,54E+08 | 0        | 0        | 0        |
| G1T7P9               | 9,08E+08 | 4,49E+08 | 3,55E+08 | 1,07E+09 | 5,75E+08 | 8,38E+08 |
| G1T7Q2               | 1,52E+09 | 5,89E+08 | 5,63E+08 | 1,12E+09 | 8,33E+08 | 1,1E+09  |
| G1T7Q3               | 7,54E+08 | 3,45E+08 | 0        | 4,11E+08 | 3,5E+08  | 3,02E+08 |
| G1T7R2;G1TF91        | 1,54E+10 | 6,44E+10 | 6,8E+10  | 1,56E+10 | 2,23E+10 | 2,2E+10  |
| G1T7R4               | 1,95E+09 | 7,48E+08 | 1,07E+09 | 1,13E+10 | 1,01E+10 | 1,06E+10 |
| G1T7S0               | 3,42E+09 | 1,05E+10 | 1,33E+10 | 5,79E+09 | 7,21E+09 | 6,89E+09 |
| G1T7S1               | 7,35E+08 | 1,06E+09 | 1,36E+09 | 5,98E+08 | 6,51E+08 | 4,89E+08 |
| G1T7S4               | 3,82E+08 | 0        | 6,03E+08 | 7,02E+08 | 4,82E+08 | 0        |
| G1T7S5               | 2E+08    | 0        | 0        | 4,46E+08 | 4,89E+08 | 1,34E+08 |
| G1T7S6               | 0        | 0        | 0        | 90432000 | 0        | 0        |
| G1T7T0               | 3,95E+08 | 2,86E+08 | 2,57E+08 | 3,3E+08  | 2,38E+08 | 4,71E+08 |
| G1T7T2               | 1,75E+09 | 2,73E+08 | 1,32E+08 | 3,97E+08 | 1,12E+09 | 1,13E+09 |
| G1T7T6               | 2,45E+08 | 9,96E+08 | 7,41E+08 | 3,45E+08 | 3,13E+08 | 0        |
| G1T7T8;Q9TT38        | 3,55E+10 | 3,16E+10 | 3,57E+10 | 1,54E+10 | 1,86E+10 | 1,43E+10 |
| U3KM36;G1T7U4;G1SV38 | 1,44E+08 | 0        | 3,97E+08 | 0        | 0        | 0        |
| G1T7U6               | 7,28E+09 | 1,5E+09  | 1,83E+09 | 6,11E+09 | 4,9E+09  | 5,21E+09 |
| G1T7U7               | 3,15E+08 | 0        | 0        | 4,66E+08 | 3,66E+08 | 3,14E+08 |
| G1T7V5               | 3,86E+10 | 1,21E+10 | 1,26E+10 | 2,29E+10 | 2,68E+10 | 3,17E+10 |
| G1T7W2               | 0        | 0        | 9,62E+08 | 4,27E+08 | 6,68E+08 | 1,09E+09 |
| G1T7W7               | 7E+09    | 2,17E+09 | 2,51E+09 | 8,52E+09 | 6,01E+09 | 4E+09    |
| G1T7X9               | 1,07E+09 | 0        | 2,63E+08 | 7,77E+08 | 3,32E+08 | 3,05E+08 |
| G1T7Y5               | 1,06E+09 | 5E+08    | 5,07E+08 | 8,38E+08 | 4,87E+08 | 4,13E+08 |
| G1T7Y7               | 6,15E+09 | 7,34E+09 | 7,54E+09 | 2,28E+09 | 2,83E+09 | 2,71E+09 |
| G1T7Z0               | 2,27E+09 | 6,88E+09 | 6,82E+09 | 2,54E+09 | 2,36E+09 | 1,93E+09 |
| G1T7Z2;G1SK19        | 1,34E+09 | 3,13E+08 | 1,85E+08 | 1,22E+08 | 0        | 0        |
| G1T7Z6               | 1,79E+10 | 7,87E+10 | 8,21E+10 | 4,39E+10 | 5,83E+10 | 4,15E+10 |
| G1T810;G1SHS4        | 0        | 1,42E+08 | 87595000 | 0        | 0        | 0        |
| G1T813;G1SHS1        | 3,09E+10 | 9,71E+09 | 8,26E+09 | 2,74E+10 | 3,22E+10 | 3,13E+10 |
| G1T822;U3KP78;G1TON9 | 0        | 5,63E+08 | 4,34E+08 | 0        | 0        | 65996000 |
| G1T823               | 2,3E+08  | 2,7E+09  | 2,52E+09 | 2,04E+08 | 2,1E+08  | 1,03E+08 |
| G1T824               | 3,64E+09 | 1,05E+10 | 1E+10    | 8,39E+09 | 9,86E+09 | 8,69E+09 |
| G1T840               | 1,7E+09  | 3,74E+09 | 3,69E+09 | 7,07E+08 | 7,09E+08 | 6,63E+08 |
| G1T845               | 4,74E+09 | 1,29E+09 | 1,46E+09 | 3,96E+09 | 2,86E+09 | 1,64E+09 |
| G1T846               | 2,29E+09 | 5,19E+09 | 5,31E+09 | 1,5E+09  | 1,88E+09 | 1,38E+09 |

|                      |          |          |          |          |          |          |
|----------------------|----------|----------|----------|----------|----------|----------|
| G1T847;G1SFA6;G1SSH5 | 1,04E+09 | 0        | 0        | 0        | 0        | 0        |
| G1T850               | 0        | 1,33E+08 | 60945000 | 0        | 0        | 0        |
| G1T852               | 0        | 0        | 0        | 3,52E+08 | 3,43E+08 | 3,75E+08 |
| G1T853               | 0        | 0        | 0        | 0        | 0        | 0        |
| G1T855;G1TLR2        | 2,96E+09 | 5,87E+08 | 6,89E+08 | 3,61E+09 | 3,87E+09 | 4,64E+09 |
| G1T863               | 0        | 0        | 0        | 0        | 4,34E+09 | 0        |
| G1T866               | 3,7E+09  | 1,02E+09 | 7,26E+08 | 4,2E+09  | 3,12E+09 | 3,34E+09 |
| G1T868               | 1,23E+09 | 1,9E+09  | 2,1E+09  | 1,46E+09 | 2,24E+09 | 1,94E+09 |
| G1T881               | 2,36E+08 | 5,52E+08 | 3,95E+08 | 3,59E+08 | 0        | 0        |
| G1T887               | 1,01E+09 | 3,66E+08 | 3,06E+08 | 5,6E+08  | 4,93E+08 | 6,61E+08 |
| G1T888               | 0        | 5,95E+08 | 5,05E+08 | 0        | 0        | 0        |
| G1T890               | 5,42E+09 | 1,06E+09 | 1,11E+09 | 1,86E+09 | 1,4E+09  | 7,81E+08 |
| G1T894               | 1,97E+08 | 7,33E+08 | 8,18E+08 | 1,84E+08 | 2,48E+08 | 2,19E+08 |
| G1T897               | 2,54E+08 | 0        | 0        | 0        | 2,9E+08  | 0        |
| G1T8A2;G1U1Y5        | 1,62E+08 | 4,05E+09 | 4,55E+09 | 1,19E+09 | 1,8E+09  | 8,46E+08 |
| G1T8A6               | 1,03E+09 | 2,32E+08 | 1,91E+08 | 2,82E+08 | 2,3E+08  | 0        |
| G1T8A7               | 3,41E+09 | 1,07E+09 | 8,79E+08 | 8,99E+08 | 1,15E+09 | 8,6E+08  |
| G1T8B3               | 4,44E+08 | 1,22E+08 | 0        | 1,78E+08 | 1,33E+08 | 1,47E+08 |
| G1T8B5;G1TJP8        | 0        | 1,17E+09 | 1,28E+09 | 2,87E+09 | 4,03E+09 | 4,43E+09 |
| G1T8C2               | 0        | 0        | 0        | 0        | 0        | 3,1E+08  |
| G1T8C8               | 3,92E+08 | 1,69E+09 | 1,71E+09 | 4,62E+08 | 7,08E+08 | 6,11E+08 |
| G1T8D4;U3KNE3        | 1,36E+09 | 4,37E+09 | 4,56E+09 | 1,51E+09 | 1,6E+09  | 1,34E+09 |
| G1T8D7;G1T0A9        | 1,63E+08 | 0        | 0        | 5,2E+08  | 2,04E+08 | 2,56E+08 |
| G1T8E0               | 2,99E+09 | 9,73E+08 | 8,94E+08 | 1,07E+09 | 8,88E+08 | 9E+08    |
| G1T8E2;G1U0J7        | 0        | 0        | 62887000 | 0        | 0        | 0        |
| G1T8E7               | 2,7E+08  | 8,48E+08 | 8,14E+08 | 8,29E+08 | 5,45E+08 | 3,56E+08 |
| G1T8E8               | 0        | 0        | 2,71E+08 | 0        | 0        | 0        |
| G1T8F7               | 3,41E+09 | 6,54E+08 | 5,66E+08 | 6,98E+08 | 6,19E+08 | 6,09E+08 |
| G1T8F8;G1TFL6        | 2,64E+09 | 4,03E+09 | 3,67E+09 | 6,36E+08 | 7,14E+08 | 6,85E+08 |
| G1T8G4               | 0        | 0        | 0        | 0        | 56170000 | 0        |
| G1T8H1               | 8,38E+09 | 2,73E+09 | 3,02E+09 | 1,06E+10 | 7,2E+09  | 4,22E+09 |
| G1T8H3               | 2,27E+08 | 2,48E+09 | 2,79E+09 | 2,07E+08 | 3,5E+08  | 3,34E+08 |
| G1T8H5               | 5,18E+08 | 1,18E+09 | 1,19E+09 | 8,78E+08 | 9,74E+08 | 1,28E+09 |
| P84246;G1TNB7;G1TJR7 | 8,2E+08  | 2,55E+09 | 1,91E+09 | 3,26E+09 | 4,18E+09 | 3,73E+09 |
| G1T8H8               | 1,31E+09 | 3,56E+08 | 3,16E+08 | 0        | 1,52E+08 | 0        |
| G1T8I9               | 0        | 0        | 0        | 1,2E+09  | 6,65E+08 | 7,78E+08 |
| G1T8J0               | 1,24E+09 | 3,11E+08 | 0        | 1,99E+08 | 0        | 0        |
| G1T8K1               | 2,91E+09 | 5,69E+08 | 6,99E+08 | 1,39E+09 | 9,36E+08 | 1,03E+09 |
| G1T8K2               | 1,13E+08 | 0        | 0        | 0        | 0        | 0        |
| G1T8L1               | 0        | 0        | 0        | 1,47E+08 | 0        | 0        |
| G1T8L2               | 2,87E+09 | 2E+09    | 1,58E+09 | 8,83E+09 | 1,09E+10 | 1,37E+10 |
| G1T8M6               | 73324000 | 1,75E+08 | 2,17E+08 | 0        | 0        | 0        |
| G1T8M9               | 8,07E+10 | 1,42E+10 | 1,48E+10 | 2,67E+10 | 1,92E+10 | 1,68E+10 |
| G1T8N7               | 2,06E+08 | 6,08E+08 | 9,51E+08 | 2,73E+08 | 2,99E+08 | 3,54E+08 |
| G1T8N8               | 3,39E+08 | 0        | 0        | 0        | 0        | 0        |
| G1T8P1               | 6,55E+08 | 0        | 1,32E+08 | 1,55E+08 | 0        | 1,15E+08 |
| G1T8P3               | 4,59E+09 | 3,44E+09 | 3,08E+09 | 5,94E+09 | 7,04E+09 | 7,14E+09 |
| G1T8P4               | 1,72E+10 | 3,43E+10 | 4,05E+10 | 1,32E+10 | 1,63E+10 | 2,38E+10 |
| G1T8P7               | 0        | 8,47E+08 | 8,5E+08  | 0        | 0        | 0        |
| G1T8R1;G1U3R6        | 1,09E+09 | 4,45E+09 | 3,98E+09 | 6,05E+08 | 1,11E+09 | 7,31E+08 |

|               |          |          |          |          |          |          |
|---------------|----------|----------|----------|----------|----------|----------|
| G1T8R2;G1T050 | 8,78E+08 | 3,14E+08 | 0        | 9,13E+08 | 7,23E+08 | 4,23E+08 |
| G1T8S4        | 0        | 0        | 1,84E+08 | 0        | 0        | 0        |
| G1T8S7        | 1,43E+09 | 4,16E+08 | 3,72E+08 | 1,44E+09 | 1,32E+09 | 1,6E+09  |
| G1T8S8;G1TTH3 | 0        | 0        | 0        | 0        | 0        | 66863000 |
| G1T8T9        | 0        | 0        | 0        | 99899000 | 0        | 0        |
| G1T8V6        | 0        | 1,14E+08 | 1,6E+08  | 0        | 0        | 0        |
| G1T8V9        | 0        | 1,69E+08 | 0        | 0        | 0        | 0        |
| G1T8Y0        | 3,23E+08 | 0        | 0        | 1,08E+08 | 0        | 0        |
| G1T8Z0        | 6,09E+09 | 3,37E+10 | 3,13E+10 | 1,68E+10 | 2,33E+10 | 1,94E+10 |
| G1T916;G1TXR9 | 8,55E+08 | 2,27E+09 | 2,28E+09 | 1,77E+08 | 2,63E+08 | 6,5E+08  |
| G1T918        | 3,07E+09 | 4,8E+09  | 4,66E+09 | 1,48E+09 | 1,69E+09 | 1,88E+09 |
| G1U4M1;G1T920 | 1,5E+08  | 2,01E+09 | 1,77E+09 | 6,05E+08 | 6,53E+08 | 7,04E+08 |
| G1T923        | 1,23E+09 | 3,52E+08 | 2,69E+08 | 3,31E+08 | 2,94E+08 | 3,34E+08 |
| G1T925        | 2,42E+09 | 5,8E+08  | 6,98E+08 | 4,12E+09 | 3,13E+09 | 3,8E+09  |
| G1T926        | 7,75E+08 | 2,93E+09 | 3,34E+09 | 9,29E+08 | 1,96E+08 | 1,96E+08 |
| G1T932;P79371 | 3,04E+08 | 1,75E+08 | 0        | 1,12E+09 | 5,13E+08 | 4,05E+08 |
| G1T950        | 0        | 0        | 0        | 0        | 3,15E+08 | 0        |
| G1T964        | 1,51E+09 | 3,11E+08 | 4,13E+08 | 2,88E+09 | 2,89E+09 | 4,31E+09 |
| G1T970        | 7,23E+09 | 1,97E+09 | 1,95E+09 | 2,74E+09 | 2,27E+09 | 2,78E+09 |
| G1T974        | 2,8E+09  | 5,16E+08 | 5,86E+08 | 2,52E+09 | 1,46E+09 | 1,08E+09 |
| G1T980        | 3,77E+09 | 9,75E+08 | 1,17E+09 | 1,75E+09 | 1,93E+09 | 1,91E+09 |
| G1T983        | 1,98E+09 | 3,18E+09 | 2,93E+09 | 1,93E+09 | 2,67E+09 | 3,42E+09 |
| G1T994;Q28902 | 1,04E+11 | 4,89E+09 | 5,14E+09 | 1,07E+11 | 6,76E+10 | 6,74E+10 |
| G1T9B1        | 6,09E+08 | 0        | 0        | 2,84E+08 | 2,67E+08 | 2,72E+08 |
| G1T9B9        | 0        | 0        | 0        | 0        | 0        | 6,97E+08 |
| G1T9C1        | 2,08E+08 | 0        | 0        | 1,51E+08 | 1,14E+08 | 0        |
| G1T9C8        | 3,99E+08 | 2,52E+08 | 2,9E+08  | 1,07E+09 | 1,41E+09 | 1,41E+09 |
| G1T9D6        | 0        | 0        | 3,39E+08 | 0        | 0        | 0        |
| G1T9D7        | 8,32E+08 | 2,95E+08 | 2,42E+08 | 2,15E+08 | 2,57E+08 | 2,44E+08 |
| G1T9E6        | 0        | 0        | 0        | 1,81E+08 | 1,71E+08 | 0        |
| G1T9F3        | 6,59E+09 | 2,07E+10 | 2,07E+10 | 4,19E+09 | 3,78E+09 | 3,24E+09 |
| G1T9F6        | 3,2E+09  | 5,22E+08 | 4,2E+08  | 4,62E+09 | 4,24E+09 | 3,78E+09 |
| G1T9F8        | 7,26E+09 | 5,46E+09 | 5,7E+09  | 6,63E+08 | 3,98E+08 | 3,7E+08  |
| G1T9G4        | 6,22E+08 | 1,41E+09 | 1,29E+09 | 6,66E+08 | 9,33E+08 | 1,13E+09 |
| G1T9G8        | 0        | 0        | 1,33E+08 | 0        | 0        | 0        |
| G1T9H0        | 0        | 3,89E+08 | 5,02E+08 | 0        | 0        | 0        |
| G1T9H4        | 3,04E+08 | 97183000 | 1E+08    | 1,5E+08  | 1,21E+08 | 94676000 |
| G1T9I3        | 0        | 4,99E+08 | 7,32E+08 | 0        | 0        | 0        |
| G1T9I4        | 3,42E+08 | 9,75E+08 | 1,19E+09 | 4,9E+08  | 7E+08    | 7,62E+08 |
| G1T9I9        | 0        | 3,72E+08 | 4,27E+08 | 0        | 0        | 0        |
| G1T9J3        | 1,83E+09 | 1,54E+09 | 6,4E+08  | 3,15E+09 | 1,47E+09 | 1,03E+09 |
| G1T9J4;G1SJD1 | 0        | 0        | 0        | 1,77E+08 | 0        | 0        |
| G1T9L6        | 1,94E+09 | 6,51E+08 | 7,31E+08 | 3,96E+09 | 3,36E+09 | 4,71E+09 |
| G1T9M7        | 0        | 1,82E+09 | 1,17E+09 | 0        | 0        | 0        |
| G1T9M9        | 1,18E+11 | 2,53E+11 | 2,96E+11 | 1,15E+11 | 1,32E+11 | 1,43E+11 |
| G1T9N2        | 6,52E+10 | 1,79E+10 | 1,83E+10 | 5,5E+10  | 6,51E+10 | 8,1E+10  |
| G1T9N3        | 2,93E+08 | 1,18E+09 | 1,62E+09 | 1,96E+08 | 2,31E+08 | 1,3E+08  |
| G1TMS2;G1T9P1 | 0        | 1,67E+08 | 0        | 0        | 0        | 0        |
| G1T9P2        | 1,79E+09 | 1,49E+09 | 1,63E+09 | 2,22E+09 | 2,08E+09 | 2,38E+09 |
| G1T9P8;G1TP78 | 0        | 2,79E+09 | 2,09E+09 | 1,92E+08 | 1,81E+08 | 1,41E+08 |

|                      |          |          |          |          |          |          |
|----------------------|----------|----------|----------|----------|----------|----------|
| G1T9Q1               | 0        | 99704000 | 1,13E+08 | 2,84E+08 | 3,96E+08 | 3,76E+08 |
| G1T9R5               | 0        | 2,31E+08 | 0        | 1,08E+09 | 1,19E+09 | 3,99E+09 |
| G1T9R8               | 0        | 3,71E+08 | 3,55E+08 | 0        | 0        | 0        |
| G1T9S4               | 1,87E+10 | 5,04E+09 | 4,4E+09  | 1,35E+10 | 1,35E+10 | 1,45E+10 |
| G1T9T5               | 2,59E+10 | 7,94E+09 | 7,53E+09 | 5,8E+09  | 7,06E+09 | 7,48E+09 |
| G1T9T8               | 0        | 0        | 2,01E+08 | 0        | 0        | 0        |
| G1T9U1               | 4,12E+08 | 0        | 1,08E+08 | 0        | 0        | 0        |
| G1T9U5;U3KM43        | 4,55E+08 | 1,37E+08 | 2,69E+08 | 8,53E+09 | 5,18E+09 | 2,28E+09 |
| G1T9V1               | 3,27E+10 | 9,76E+09 | 9,85E+09 | 3,21E+10 | 3,36E+10 | 4,35E+10 |
| G1T9V2               | 3,69E+08 | 3,18E+08 | 3,82E+08 | 2,65E+09 | 2,63E+09 | 2,72E+09 |
| G1T9V4               | 6,71E+09 | 1,4E+10  | 1,47E+10 | 4,05E+09 | 4,94E+09 | 4,49E+09 |
| G1T9W3               | 2,22E+08 | 3,66E+08 | 4,5E+08  | 7,52E+08 | 5,97E+08 | 3,91E+08 |
| G1T9W8               | 0        | 2,61E+08 | 1,9E+08  | 0        | 0        | 0        |
| G1T9W9;U3KM57        | 0        | 3,14E+08 | 0        | 0        | 0        | 0        |
| G1T9X4               | 0        | 0        | 0        | 6,65E+08 | 4,17E+08 | 4,43E+08 |
| G1T9X8               | 1,37E+08 | 1,18E+08 | 0        | 3,85E+08 | 1,88E+08 | 2,99E+08 |
| G1T9Y5               | 1,83E+08 | 6,28E+08 | 5,98E+08 | 1,63E+08 | 2,01E+08 | 2,45E+08 |
| G1T9Z9               | 1,18E+09 | 5,43E+08 | 1,97E+08 | 6,88E+08 | 5,02E+08 | 6,04E+08 |
| G1TTP5;G1TA01        | 9,27E+09 | 2,31E+09 | 2,32E+09 | 1,23E+10 | 1,06E+10 | 8,09E+09 |
| G1TA04               | 1,03E+10 | 6,43E+09 | 5,87E+09 | 9,3E+09  | 8,07E+09 | 8,93E+09 |
| O77751;G1TA10        | 0        | 0        | 0        | 0        | 3,21E+08 | 3,24E+08 |
| G1TA11               | 8,03E+08 | 2,84E+09 | 2,91E+09 | 1,37E+09 | 1,14E+09 | 4,82E+08 |
| G1TA15               | 6,31E+08 | 1,9E+09  | 2,41E+09 | 7,8E+08  | 4,83E+08 | 4,72E+08 |
| G1TA21               | 1,49E+09 | 3,81E+08 | 3,82E+08 | 1,05E+09 | 9,8E+08  | 1,03E+09 |
| G1TA37               | 7,09E+08 | 4,91E+09 | 4E+09    | 1,31E+09 | 2,02E+09 | 2,17E+09 |
| G1TA38               | 6,13E+08 | 2,96E+08 | 2,37E+08 | 3,8E+08  | 4,25E+08 | 4,75E+08 |
| G1TA40               | 2,87E+08 | 0        | 0        | 2,71E+08 | 3,15E+08 | 2,23E+08 |
| G1TA42               | 4,6E+08  | 1,62E+08 | 1,56E+08 | 3,54E+08 | 2,6E+08  | 1,69E+08 |
| G1TA48               | 0        | 4,3E+08  | 1,17E+09 | 2,03E+08 | 1,92E+08 | 2,62E+08 |
| G1TA50               | 1,34E+08 | 4,51E+08 | 6,07E+08 | 0        | 1,42E+08 | 85081000 |
| G1TA53               | 1,02E+08 | 0        | 0        | 0        | 0        | 0        |
| G1TA59               | 3,7E+10  | 1,16E+10 | 1,06E+10 | 1,12E+10 | 1,57E+10 | 1,67E+10 |
| G1TA69               | 2,53E+09 | 7,84E+08 | 3,81E+08 | 2,79E+09 | 3,41E+09 | 4,01E+09 |
| G1TA79               | 0        | 0        | 0        | 1,25E+08 | 1,35E+08 | 1,42E+08 |
| G1TA80               | 0        | 2,47E+08 | 0        | 0        | 0        | 0        |
| G1TA83               | 1,73E+09 | 1,08E+10 | 1,05E+10 | 1,7E+09  | 3,06E+09 | 2,08E+09 |
| G1TA86               | 5,56E+08 | 1,82E+08 | 1,5E+08  | 2,11E+08 | 1,8E+08  | 1,74E+08 |
| G1TAA4               | 1,14E+09 | 3,97E+08 | 4,47E+08 | 1,35E+09 | 1,13E+09 | 7,93E+08 |
| G1TAB2               | 2,27E+09 | 8,31E+08 | 5,31E+08 | 1,41E+09 | 2,09E+09 | 2,65E+09 |
| G1TAB7               | 1,01E+10 | 1,96E+09 | 2,08E+09 | 8,66E+09 | 8,67E+09 | 9,37E+09 |
| G1TAB8;G1TN05;G1U6S9 | 1,19E+08 | 0        | 0        | 0        | 0        | 0        |
| G1TAC3               | 3,52E+09 | 9,36E+08 | 5,22E+08 | 3,35E+09 | 2,67E+09 | 1,58E+09 |
| P12864;G1TAC4        | 4,97E+08 | 2,67E+09 | 3,67E+09 | 8,04E+08 | 1,24E+09 | 1,14E+09 |
| G1TAD3               | 32174000 | 39202000 | 26873000 | 67546000 | 3,25E+08 | 3,16E+08 |
| G1TAE0               | 67830000 | 0        | 0        | 0        | 0        | 0        |
| G1TAE2;G1SPW3;G1TWN7 | 8,96E+09 | 3,08E+09 | 2,78E+09 | 6,24E+09 | 6,54E+09 | 6,45E+09 |
| G1TAE4               | 0        | 0        | 2,96E+08 | 0        | 0        | 0        |
| G1TAF5               | 4,38E+08 | 5,28E+08 | 4,17E+08 | 1,1E+08  | 3,1E+08  | 2,72E+08 |
| G1TAF8               | 8,12E+09 | 3,41E+10 | 3,73E+10 | 4,43E+09 | 6,9E+09  | 7,24E+09 |
| G1TAG3;G1SLM9        | 2,85E+08 | 1,96E+08 | 1,37E+08 | 2,94E+08 | 2,67E+08 | 5,62E+08 |

|                      |          |          |          |          |          |          |
|----------------------|----------|----------|----------|----------|----------|----------|
| G1TAH7               | 3,72E+10 | 2,85E+11 | 2,50E+11 | 5,35E+11 | 6,74E+11 | 5,12E+11 |
| G1TAIO               | 1,61E+09 | 3,5E+09  | 2,62E+09 | 2,37E+08 | 3,3E+08  | 3,99E+08 |
| G1TAI8               | 2,34E+08 | 6,93E+09 | 5,84E+09 | 5,02E+08 | 2,67E+08 | 3,13E+08 |
| G1TAJ3;G1TX67        | 0        | 0        | 1,44E+08 | 0        | 0        | 1,27E+08 |
| G1TAK0               | 0        | 1,52E+09 | 1,67E+09 | 1,4E+09  | 1,42E+09 | 3,6E+09  |
| G1TAK1               | 3,89E+09 | 4,93E+08 | 5,26E+08 | 2,3E+09  | 2,51E+09 | 2,34E+09 |
| G1TAK6               | 1,74E+09 | 3,37E+09 | 6,31E+09 | 1,86E+09 | 2,25E+09 | 1,49E+09 |
| G1TVU5;G1TAL1        | 0        | 4,01E+08 | 4,66E+08 | 2,67E+08 | 2,26E+08 | 4,38E+08 |
| G1TAL6;G1SPP7        | 4,48E+09 | 8,7E+08  | 9,77E+08 | 4,76E+09 | 3,6E+09  | 2,24E+09 |
| G1TAM3               | 1,77E+08 | 2,7E+09  | 2,9E+09  | 2,58E+08 | 3,38E+08 | 2,73E+08 |
| G1TAM8;G1TGJ6        | 1,25E+09 | 5,02E+09 | 5,14E+09 | 1,86E+09 | 2,13E+09 | 2,57E+09 |
| G1TAN3               | 0        | 4,1E+08  | 3,39E+08 | 0        | 0        | 0        |
| G1TAN4               | 1,29E+08 | 72824000 | 68574000 | 1,23E+08 | 1,17E+08 | 1,01E+08 |
| G1TAN9               | 6,43E+08 | 3,2E+09  | 3,8E+09  | 3,22E+08 | 5,37E+08 | 2,37E+08 |
| G1TAP1               | 1,07E+09 | 5,84E+09 | 5,07E+09 | 0        | 6,68E+08 | 0        |
| G1TAQ9               | 3,69E+08 | 0        | 0        | 0        | 0        | 0        |
| G1TAR0               | 3,03E+08 | 81197000 | 65323000 | 73787000 | 0        | 0        |
| G1TAS1               | 2,61E+08 | 0        | 1,92E+08 | 0        | 0        | 0        |
| G1TAS9;G1TAV8        | 1,52E+09 | 3,14E+08 | 3,08E+08 | 6,94E+08 | 1,06E+09 | 1,25E+09 |
| G1TAT4               | 0        | 1,12E+08 | 0        | 0        | 0        | 0        |
| G1TAU6               | 0        | 0        | 0        | 3,19E+08 | 2,52E+08 | 4,71E+08 |
| G1TAU7               | 3,99E+08 | 0        | 1,41E+08 | 1,78E+08 | 2E+08    | 2,18E+08 |
| G1TAV2               | 72730000 | 0        | 0        | 1,02E+08 | 0        | 0        |
| G1TAV7               | 0        | 0        | 0        | 2,91E+08 | 2,34E+08 | 1,71E+08 |
| G1TAV9               | 1,42E+08 | 1,86E+08 | 0        | 6,28E+08 | 2,4E+08  | 0        |
| G1TAW7               | 2,28E+08 | 2,12E+09 | 1,63E+09 | 1,67E+08 | 2,69E+08 | 0        |
| U3KP94;G1TAY2;G1TUH1 | 0        | 4,3E+08  | 3,97E+08 | 0        | 0        | 0        |
| U3KLX8;G1TAY8        | 5,98E+08 | 4,51E+08 | 4,86E+08 | 9,78E+08 | 1,09E+09 | 9,34E+08 |
| G1U2T0;G1TAZ4        | 97909000 | 0        | 0        | 0        | 0        | 0        |
| G1TB05               | 6,45E+09 | 1,71E+09 | 2E+09    | 2,48E+09 | 1,87E+09 | 1,34E+09 |
| G1TB07;G1TME1        | 0        | 0        | 0        | 0        | 80274000 | 0        |
| G1TB10               | 2,39E+08 | 0        | 0        | 1,46E+08 | 1,51E+08 | 1,41E+08 |
| G1TB17               | 0        | 8,69E+08 | 1,01E+09 | 5,03E+08 | 0        | 0        |
| G1TB19               | 3,42E+09 | 1,3E+09  | 1,52E+09 | 1,38E+10 | 1,37E+10 | 1,59E+10 |
| G1TB33               | 2,17E+09 | 4,5E+08  | 4,15E+08 | 8,84E+08 | 1,28E+09 | 1,33E+09 |
| G1TB34               | 5,46E+08 | 2,67E+08 | 2,07E+08 | 5,49E+08 | 3,32E+08 | 3,09E+08 |
| G1TB39               | 2,38E+08 | 2,78E+08 | 4,7E+08  | 1,36E+08 | 0        | 0        |
| G1TB40               | 1,51E+08 | 1,61E+09 | 1,27E+09 | 0        | 2,82E+08 | 3,17E+08 |
| G1TB45               | 4,95E+08 | 5,59E+08 | 7,79E+08 | 5,95E+08 | 5,46E+08 | 6,27E+08 |
| G1TB47               | 0        | 1,15E+09 | 1,61E+09 | 0        | 0        | 0        |
| G1TB49               | 1,49E+09 | 1,55E+09 | 1,57E+09 | 1,23E+09 | 1,53E+09 | 1,48E+09 |
| G1TB50               | 3,35E+09 | 5,55E+08 | 6,43E+08 | 1,13E+08 | 1,18E+08 | 0        |
| G1TB57               | 1,86E+09 | 3,86E+08 | 6,31E+08 | 6,04E+08 | 5,81E+08 | 5,67E+08 |
| G1TB64               | 4,25E+08 | 0        | 0        | 0        | 0        | 0        |
| G1TB66               | 36679000 | 0        | 2,1E+08  | 0        | 0        | 0        |
| G1TB68               | 0        | 0        | 1,96E+08 | 0        | 0        | 0        |
| G1TB71               | 0        | 1,94E+08 | 0        | 0        | 0        | 0        |
| G1TB74               | 5,19E+09 | 3,93E+09 | 3,16E+09 | 8,09E+10 | 8,26E+10 | 1,12E+11 |
| Q2PS21;G1TB78        | 0        | 2,63E+08 | 3,61E+08 | 1,4E+08  | 3,32E+08 | 1,69E+08 |
| G1TB95               | 6,68E+08 | 7,84E+08 | 7,08E+08 | 8,5E+09  | 7,31E+09 | 8,23E+09 |

|                        |          |          |          |          |          |          |
|------------------------|----------|----------|----------|----------|----------|----------|
| G1TB98                 | 7,83E+09 | 4,45E+09 | 4,9E+09  | 3,73E+09 | 5,06E+09 | 6,69E+09 |
| G1TBA4                 | 3,05E+08 | 0        | 92562000 | 0        | 0        | 0        |
| G1TBC0                 | 1,54E+08 | 2,25E+08 | 2,23E+08 | 8,97E+08 | 7,39E+08 | 4,17E+08 |
| G1TBC1;O18750          | 2,78E+11 | 1,55E+11 | 1,37E+11 | 3,17E+11 | 3,07E+11 | 4,44E+11 |
| G1TBC4                 | 1,14E+09 | 4,67E+08 | 3,18E+08 | 3,69E+08 | 0        | 3,3E+08  |
| G1TBC6                 | 1,51E+09 | 5,51E+08 | 5,28E+08 | 1,66E+09 | 2,21E+09 | 2,46E+09 |
| G1TBC8                 | 0        | 5,4E+08  | 1,89E+08 | 0        | 0        | 0        |
| G1TBD8                 | 2,24E+08 | 67045000 | 1,69E+08 | 4,08E+09 | 3,03E+09 | 3,6E+09  |
| G1TBE5                 | 92091000 | 0        | 0        | 0        | 0        | 0        |
| G1TBE9                 | 0        | 0        | 0        | 4,33E+08 | 2,81E+08 | 4,63E+08 |
| G1TBH5;G1U5N8          | 3,7E+09  | 3,32E+09 | 3,15E+09 | 5,38E+09 | 5,94E+09 | 7,1E+09  |
| G1TBH6                 | 0        | 0        | 0        | 1,36E+08 | 0        | 91866000 |
| G1TBI3                 | 3,06E+08 | 0        | 0        | 0        | 0        | 0        |
| G1TBK0                 | 0        | 3,48E+08 | 4,82E+08 | 0        | 0        | 0        |
| G1TBL0                 | 4,46E+08 | 7,45E+08 | 9,34E+08 | 0        | 0        | 0        |
| G1TBL1                 | 2,68E+09 | 6,64E+08 | 4,89E+08 | 3,15E+09 | 2,14E+09 | 1,71E+09 |
| G1TBL6;G1SF26          | 3,41E+10 | 3,82E+10 | 3,9E+10  | 2,02E+10 | 1,65E+10 | 8,71E+09 |
| G1TBN5                 | 6,45E+08 | 2,47E+08 | 2,26E+08 | 6,37E+08 | 4,25E+08 | 1,12E+09 |
| G1TBQ5                 | 0        | 1,79E+09 | 1,81E+09 | 4,68E+08 | 4,65E+08 | 3,78E+08 |
| G1TBQ6                 | 3,57E+09 | 1,21E+09 | 7,74E+08 | 6,81E+09 | 5,99E+09 | 6,47E+09 |
| G1TBR1                 | 0        | 0        | 1,66E+08 | 0        | 0        | 0        |
| G1TBR5                 | 5,49E+09 | 2,15E+09 | 1,79E+09 | 6,48E+09 | 5,74E+09 | 4,28E+09 |
| U3KN28;G1TBR6          | 37483000 | 0        | 0        | 0        | 0        | 0        |
| G1TBS1                 | 1,24E+10 | 2,77E+10 | 2,37E+10 | 2,16E+10 | 2,67E+10 | 2,82E+10 |
| G1TBS2                 | 4,36E+09 | 9,04E+09 | 9,06E+09 | 2,78E+09 | 2,94E+09 | 2,56E+09 |
| G1TBS4;G1SMV4;Q00804-2 | 1,53E+09 | 3,55E+08 | 4,68E+08 | 2,85E+09 | 2,81E+09 | 2,13E+09 |
| G1TBT4;G1SNL8          | 94235000 | 0        | 0        | 0        | 0        | 0        |
| G1TBU4                 | 1,79E+08 | 0        | 0        | 0        | 0        | 0        |
| G1TBU8                 | 3,09E+08 | 3,85E+08 | 3,06E+08 | 0        | 0        | 0        |
| G1TBU9                 | 5,31E+10 | 1,39E+10 | 1,13E+10 | 1,76E+10 | 1,5E+10  | 1,5E+10  |
| G1TBV4                 | 2E+08    | 5,42E+09 | 5,73E+09 | 92470000 | 0        | 58127000 |
| G1TBW1                 | 1,41E+09 | 6,98E+09 | 8,02E+09 | 1,95E+09 | 2,34E+09 | 2,62E+09 |
| G1TBW7;G1SF15;G1SMS5   | 2,45E+09 | 4,39E+08 | 1,92E+08 | 3,08E+09 | 2,77E+09 | 1,99E+09 |
| G1TBW9                 | 1,5E+08  | 5,41E+08 | 3,84E+08 | 2,87E+08 | 1,31E+08 | 5,24E+08 |
| G1TBX7;G1TZW4          | 0        | 0        | 0        | 22116000 | 0        | 0        |
| G1TBX9                 | 0        | 0        | 89233000 | 0        | 0        | 0        |
| G1TBY1                 | 3,08E+10 | 1,39E+10 | 1,55E+10 | 1,33E+10 | 1,35E+10 | 2,03E+10 |
| G1TBY2                 | 0        | 4,46E+08 | 4,62E+08 | 0        | 0        | 0        |
| G1TBY3                 | 0        | 0        | 0        | 0        | 16078000 | 0        |
| G1TBY9                 | 0        | 0        | 2,06E+08 | 0        | 0        | 0        |
| G1TBZ1                 | 0        | 2,03E+08 | 1,16E+08 | 0        | 0        | 0        |
| G1TBZ5;U3KPE7          | 3,32E+09 | 1,81E+10 | 1,87E+10 | 7,11E+09 | 8,17E+09 | 7,28E+09 |
| G1TC03                 | 3,86E+09 | 1,18E+10 | 1,26E+10 | 2,88E+10 | 2,88E+10 | 3,85E+10 |
| G1TC07                 | 0        | 1,04E+08 | 65174000 | 0        | 77392000 | 66890000 |
| G1TC10                 | 3,99E+08 | 1,88E+09 | 2,47E+09 | 0        | 1,65E+08 | 0        |
| G1TC19                 | 2,21E+09 | 4,16E+08 | 2,19E+08 | 1,15E+09 | 9,65E+08 | 8,77E+08 |
| G1TC33;Q99105          | 0        | 0        | 0        | 0        | 60558000 | 0        |
| G1TC38                 | 5,19E+08 | 2,66E+08 | 2,79E+08 | 7,11E+08 | 9,99E+08 | 1,03E+09 |
| G1TC48                 | 3,25E+08 | 1,08E+09 | 1,12E+09 | 1,23E+09 | 5,78E+08 | 9,08E+08 |
| G1TC61;G1SCN3          | 1,2E+09  | 4,78E+09 | 4,71E+09 | 4,84E+09 | 4,88E+09 | 7,09E+09 |



|                      |          |          |          |          |          |          |
|----------------------|----------|----------|----------|----------|----------|----------|
| G1TC64               | 1,27E+09 | 1,72E+08 | 1,93E+08 | 2,13E+08 | 2,16E+08 | 2,6E+08  |
| G1TC70;G1SJB0        | 1,95E+09 | 2,58E+09 | 2,23E+09 | 2,63E+09 | 2,81E+09 | 3,46E+09 |
| G1TC90               | 0        | 1,93E+08 | 0        | 0        | 0        | 0        |
| G1TCA0               | 3,77E+08 | 0        | 0        | 0        | 0        | 0        |
| G1TCA8               | 0        | 0        | 0        | 0        | 0        | 1,78E+08 |
| G1TCB7               | 9,83E+08 | 3,11E+09 | 2,93E+09 | 5,8E+08  | 7,74E+08 | 8,49E+08 |
| G1TCC1               | 1,5E+09  | 3,35E+08 | 3,21E+08 | 1,01E+09 | 1,45E+09 | 3,67E+08 |
| G1TCC2               | 1,5E+08  | 76279000 | 0        | 2,49E+08 | 1,94E+08 | 6,49E+08 |
| G1TCC8               | 1,88E+09 | 1,56E+09 | 1,91E+09 | 2,75E+09 | 3,02E+09 | 3,92E+09 |
| G1TCD1;G1TF66        | 7,6E+08  | 0        | 0        | 2,53E+08 | 2,33E+08 | 2,31E+08 |
| G1TCD4               | 2,24E+08 | 8,5E+08  | 9,32E+08 | 8,15E+08 | 9,07E+08 | 9,96E+08 |
| G1TCE2               | 2E+09    | 6,18E+08 | 6,32E+08 | 2,9E+09  | 2,26E+09 | 1,31E+09 |
| G1TCE9               | 5,8E+09  | 9,35E+08 | 9,89E+08 | 4,32E+09 | 4E+09    | 3,45E+09 |
| G1TCF3               | 1,01E+09 | 1,75E+09 | 1,08E+09 | 3,59E+08 | 5,12E+08 | 5,45E+08 |
| G1TCG3               | 7,02E+08 | 9,02E+08 | 5,8E+08  | 1,53E+09 | 8,29E+08 | 1,78E+09 |
| G1TCH9               | 1,03E+09 | 2,59E+08 | 3,04E+08 | 1,02E+09 | 6,6E+08  | 2,95E+08 |
| G1TCI9               | 7,37E+08 | 0        | 0        | 0        | 0        | 0        |
| G1TCJ4               | 1,31E+08 | 0        | 0        | 85238000 | 1,41E+08 | 0        |
| G1TCJ8               | 7,39E+08 | 5,83E+08 | 4,23E+08 | 7,86E+08 | 7,95E+08 | 7,41E+08 |
| G1TCK9               | 5,09E+08 | 1,64E+09 | 1,71E+09 | 4,41E+08 | 4,13E+08 | 1,63E+08 |
| G1TCL7               | 4,54E+08 | 3,55E+08 | 4,65E+08 | 2,7E+09  | 2,04E+09 | 3,19E+09 |
| G1TCM0               | 64205000 | 1,64E+08 | 0        | 0        | 47143000 | 0        |
| G1TCM9               | 6,43E+08 | 3,2E+09  | 3,48E+09 | 4,36E+08 | 5,45E+08 | 6,19E+08 |
| G1TCP3               | 1,93E+09 | 1,26E+10 | 1,36E+10 | 3,02E+09 | 3,22E+09 | 4,73E+09 |
| G1TCP8               | 1,01E+09 | 3,75E+08 | 2,93E+08 | 1,22E+09 | 1,62E+09 | 2,21E+09 |
| G1TCQ4               | 2,08E+08 | 7,8E+08  | 4,25E+08 | 0        | 0        | 0        |
| G1TCS3;G1TG27        | 71852000 | 1,19E+09 | 1,17E+09 | 1,25E+08 | 2,62E+08 | 1,6E+08  |
| G1TCS8               | 2,31E+10 | 7,42E+09 | 9,17E+09 | 1,73E+10 | 1,45E+10 | 9,88E+09 |
| G1TCT3               | 1,93E+08 | 5,28E+08 | 8,82E+08 | 0        | 2,11E+08 | 2E+08    |
| G1TCU4               | 1,35E+09 | 8,83E+08 | 1,1E+09  | 1,5E+09  | 1,54E+09 | 2,06E+09 |
| G1TCU6;G1SNW9        | 1,32E+08 | 0        | 73938000 | 3,06E+08 | 4,59E+08 | 4,26E+08 |
| G1TCU9               | 0        | 0        | 0        | 7,92E+08 | 6,82E+08 | 8,32E+08 |
| G1TCW1;G1SDP0;G1TTY5 | 1,97E+10 | 5,41E+09 | 6,47E+09 | 6,9E+09  | 6,43E+09 | 4,49E+09 |
| G1TCW2               | 2,8E+08  | 1,49E+09 | 1,66E+09 | 2,28E+08 | 2,63E+08 | 2,87E+08 |
| G1TCW5               | 2,91E+08 | 1,53E+09 | 1,26E+09 | 1,46E+08 | 3,15E+08 | 1,94E+08 |
| G1TCX0               | 4,08E+09 | 1,04E+09 | 7,74E+08 | 1,78E+09 | 1,81E+09 | 1,94E+09 |
| G1TCX6               | 3,94E+09 | 7,73E+08 | 8,08E+08 | 2,31E+09 | 1,59E+09 | 1,34E+09 |
| G1TCY3               | 1,34E+09 | 0        | 0        | 0        | 0        | 0        |
| G1TCY4               | 5,72E+08 | 2,21E+09 | 2,42E+09 | 9,31E+08 | 8,84E+08 | 1,52E+09 |
| G1TCY7               | 0        | 0        | 1,39E+08 | 0        | 0        | 0        |
| G1TCY8               | 2,83E+08 | 6,29E+08 | 5,09E+08 | 3,65E+08 | 6,63E+08 | 5,2E+08  |
| G1TCZ0               | 2,47E+10 | 7,03E+09 | 5,83E+09 | 3,23E+10 | 3,09E+10 | 4,37E+10 |
| G1TCZ8               | 3E+09    | 5,78E+09 | 4,8E+09  | 1,36E+09 | 1,3E+09  | 1,51E+09 |
| G1TD13               | 89456000 | 0        | 0        | 0        | 0        | 0        |
| G1TD22               | 0        | 1,59E+08 | 0        | 0        | 0        | 0        |
| G1TD26               | 1,82E+09 | 3,68E+08 | 4,43E+08 | 3,72E+08 | 3,3E+08  | 0        |
| G1TD30               | 1,81E+08 | 4,68E+08 | 3,52E+08 | 2,19E+09 | 3,53E+09 | 7,76E+09 |
| G1TD34               | 0        | 0        | 0        | 1,36E+08 | 1,36E+08 | 0        |
| G1TD36               | 4,19E+08 | 0        | 0        | 2,58E+08 | 0        | 0        |
| G1TD41;G1U248        | 1,42E+10 | 1,25E+10 | 1,36E+10 | 1,17E+10 | 1,54E+10 | 1,79E+10 |

|                       |          |          |          |          |          |          |
|-----------------------|----------|----------|----------|----------|----------|----------|
| G1TN68;G1TD51         | 2,43E+09 | 2,47E+09 | 1,55E+09 | 4,83E+09 | 5,75E+09 | 4,88E+09 |
| G1TD61                | 4,38E+08 | 3,59E+08 | 3,42E+08 | 6,27E+08 | 7,03E+08 | 7,6E+08  |
| G1TD69                | 2,43E+08 | 0        | 0        | 0        | 0        | 0        |
| G1TD91;G1TQQ3;G1TJSJ3 | 5,31E+08 | 1,22E+09 | 1,02E+09 | 1,54E+09 | 2,24E+09 | 1,4E+09  |
| G1TD98;U3KP75         | 9,77E+08 | 2,09E+09 | 2,03E+09 | 8,81E+08 | 9,54E+08 | 9,83E+08 |
| G1TD99                | 8,53E+09 | 3,47E+09 | 2,82E+09 | 5,53E+09 | 5,38E+09 | 5,91E+09 |
| G1TDA7                | 2,7E+09  | 5,8E+08  | 7,96E+08 | 1,59E+09 | 1,45E+09 | 1,7E+09  |
| G1TDA9                | 4,46E+08 | 9,22E+08 | 7,24E+08 | 7,25E+08 | 7,29E+08 | 8,24E+08 |
| G1TDB3                | 2,96E+09 | 1,2E+10  | 1,11E+10 | 7,15E+09 | 6,75E+09 | 7,95E+09 |
| G1TDB8                | 5,9E+08  | 3,49E+08 | 0        | 1,12E+09 | 6,75E+08 | 4,73E+08 |
| G1TDC3                | 6,28E+10 | 1,97E+10 | 1,99E+10 | 3,73E+10 | 2,8E+10  | 2,7E+10  |
| G1TDD2                | 3,05E+08 | 2,21E+09 | 2,61E+09 | 3,04E+08 | 2,86E+08 | 3,38E+08 |
| G1TDF6                | 4,04E+08 | 3,41E+08 | 0        | 7,05E+08 | 4,77E+08 | 0        |
| G1TDH4;U3KP56         | 4,47E+10 | 1,14E+10 | 1,2E+10  | 1,92E+10 | 2,34E+10 | 2,61E+10 |
| G1TDH6                | 6,07E+08 | 0        | 0        | 2,35E+08 | 3,53E+08 | 3,19E+08 |
| G1TDI0                | 4,61E+09 | 1,27E+10 | 1,37E+10 | 2,29E+09 | 2,87E+09 | 2,01E+09 |
| G1TDI1                | 3,16E+08 | 0        | 0        | 0        | 0        | 0        |
| G1TDI3                | 2,02E+08 | 5,39E+08 | 0        | 1,14E+09 | 8,26E+08 | 1,46E+09 |
| G1TDJ2                | 1,3E+09  | 8,07E+08 | 9,95E+08 | 1,3E+09  | 2,05E+09 | 1,55E+09 |
| G1TDJ3                | 1,02E+10 | 2,88E+09 | 2,65E+09 | 9,13E+09 | 7,44E+09 | 5,6E+09  |
| G1TDJ9;G1SQ94;G1SMM8  | 2,37E+08 | 5,56E+08 | 6,75E+08 | 3,29E+08 | 3,73E+08 | 3,13E+08 |
| G1TDK0;G1TDJ5         | 0        | 0        | 1,58E+08 | 0        | 0        | 0        |
| G1TDK8;G1SGG5         | 3,23E+09 | 1,77E+09 | 1,55E+09 | 2,11E+09 | 2,4E+09  | 2,47E+09 |
| G1U1G9;G1TDL2;G1TTU0  | 7,48E+09 | 2,26E+10 | 2,47E+10 | 7,05E+09 | 8,01E+09 | 6,56E+09 |
| G1TDM4                | 0        | 0        | 1,34E+08 | 0        | 0        | 0        |
| G1TDM9                | 2,26E+09 | 9,71E+08 | 8,91E+08 | 1,46E+09 | 2,16E+09 | 2,72E+09 |
| G1TDN1                | 2,67E+09 | 1,11E+09 | 1,47E+09 | 4,88E+09 | 7,66E+09 | 8,81E+09 |
| G1TDN3                | 8,01E+08 | 3,83E+08 | 2,75E+08 | 4,21E+08 | 5,35E+08 | 5,71E+08 |
| G1TDN4                | 3,27E+09 | 8,33E+09 | 9,93E+09 | 1,8E+09  | 2,03E+09 | 2,94E+09 |
| U3KNF5;G1TDQ1         | 60818000 | 3,59E+08 | 4,14E+08 | 0        | 69350000 | 83252000 |
| G1TDQ2;G1TH28         | 8,02E+08 | 3,66E+09 | 3,87E+09 | 5,67E+08 | 6,01E+08 | 6,22E+08 |
| G1TDQ3                | 9,54E+08 | 4,38E+09 | 3,84E+09 | 3,27E+09 | 3,13E+09 | 3,15E+09 |
| P00511;G1TDQ5         | 1,8E+08  | 1,04E+09 | 1E+09    | 3,19E+08 | 2,67E+08 | 2,13E+08 |
| G1TDS3                | 6,98E+08 | 1,37E+08 | 1,2E+08  | 1,63E+08 | 1,61E+08 | 1,61E+08 |
| G1TDT3                | 2,53E+08 | 1,38E+09 | 8,26E+08 | 3,84E+08 | 1,99E+08 | 0        |
| G1TDU0;G1TMW4         | 9,68E+08 | 2,34E+09 | 2,72E+09 | 6,54E+08 | 5,36E+08 | 4,88E+08 |
| G1TDU5;G1TF09         | 7,65E+08 | 2,27E+08 | 3,69E+08 | 1,18E+10 | 1,74E+10 | 2,12E+10 |
| G1TDV4                | 0        | 0        | 2,89E+08 | 0        | 0        | 1,49E+08 |
| G1TDX2                | 1,29E+09 | 5,81E+08 | 1,6E+08  | 7,9E+08  | 9,91E+08 | 5,22E+08 |
| G1TDY4                | 88881000 | 0        | 0        | 0        | 0        | 0        |
| G1TE03                | 5,98E+08 | 0        | 2,05E+08 | 2,7E+08  | 2,96E+08 | 3,66E+08 |
| G1TE08                | 1,7E+09  | 9,96E+08 | 1,11E+09 | 1,54E+09 | 1,65E+09 | 1,65E+09 |
| G1TE13                | 1,51E+09 | 3,49E+08 | 3,39E+08 | 4,52E+08 | 3,84E+08 | 3,91E+08 |
| G1TE17                | 0        | 0        | 0        | 52418000 | 0        | 0        |
| U3KPE9;G1TE20         | 9,39E+08 | 64750000 | 1,31E+08 | 2,3E+08  | 1,51E+08 | 1,37E+08 |
| G1TE27                | 5,56E+09 | 2,02E+09 | 2,37E+09 | 4,62E+09 | 5,27E+09 | 5,16E+09 |
| G1TE34                | 4,17E+09 | 1,22E+09 | 1,32E+09 | 1,17E+10 | 1,36E+10 | 1,62E+10 |
| G1TE37                | 7,86E+08 | 0        | 0        | 0        | 3,31E+08 | 2,93E+08 |
| G1TE39                | 2,67E+09 | 1,91E+09 | 1,25E+09 | 1,04E+10 | 6,52E+09 | 5,82E+09 |
| G1TE45;G1TML5;G1TLG3  | 0        | 0        | 2,78E+08 | 0        | 0        | 0        |

|                      |          |          |          |          |          |          |
|----------------------|----------|----------|----------|----------|----------|----------|
| Q9N0V7;G1TE53        | 0        | 0        | 1,03E+08 | 0        | 0        | 0        |
| G1TE60               | 2E+08    | 1,3E+08  | 85170000 | 88209000 | 0        | 0        |
| G1TE61;G1STV1        | 9,11E+08 | 1,81E+09 | 1,86E+09 | 5,23E+08 | 4,59E+08 | 5,81E+08 |
| G1TE64               | 1,67E+09 | 9,3E+08  | 9,98E+08 | 1,67E+09 | 1,5E+09  | 1,37E+09 |
| G1TE68               | 5,96E+09 | 3,72E+09 | 2,76E+09 | 9,31E+09 | 1,13E+10 | 1,39E+10 |
| G1TE69;G1T068        | 6,86E+09 | 6,98E+09 | 6,77E+09 | 1,23E+10 | 1,11E+10 | 1,54E+10 |
| G1TE76               | 6,83E+08 | 6,73E+09 | 8,68E+09 | 1,3E+09  | 1,15E+09 | 1,93E+09 |
| G1TE78               | 4,14E+08 | 1,56E+09 | 1,9E+09  | 3,77E+08 | 1,01E+09 | 1,12E+09 |
| G1TE83               | 2,52E+08 | 4,33E+08 | 4,64E+08 | 2,84E+08 | 4,24E+08 | 3,21E+08 |
| G1TE88               | 0        | 64251000 | 0        | 0        | 0        | 0        |
| G1TE89               | 63258000 | 0        | 0        | 0        | 0        | 0        |
| G1TE90               | 6,1E+08  | 1,76E+08 | 1,28E+08 | 3,22E+08 | 1,01E+08 | 1,33E+08 |
| G1TE96               | 0        | 3,76E+08 | 5,77E+08 | 2,24E+08 | 2,19E+08 | 1,82E+08 |
| G1TEA0               | 4,69E+08 | 2,58E+08 | 2,38E+08 | 4,85E+08 | 4,81E+08 | 8,64E+08 |
| G1TEA5               | 2,72E+08 | 1,49E+09 | 1,48E+09 | 2,47E+08 | 5,99E+08 | 4,25E+08 |
| G1TEA8;G1SIV0;U3KN16 | 2,9E+09  | 1,51E+10 | 1,9E+10  | 4,59E+08 | 3,56E+08 | 4,76E+08 |
| G1TED0               | 1,96E+09 | 1,04E+09 | 8,52E+08 | 9,31E+08 | 9,76E+08 | 9,82E+08 |
| G1TED6               | 4,86E+09 | 2,25E+10 | 2,29E+10 | 2,2E+10  | 2,33E+10 | 2,6E+10  |
| G1TEE3;G1SRX1        | 0        | 1,46E+08 | 2,05E+08 | 1,37E+08 | 98862000 | 1,35E+08 |
| G1TEG1;U3KNA6        | 1,71E+09 | 7,04E+08 | 4,41E+08 | 1,34E+09 | 7,11E+08 | 6,22E+08 |
| G1TEG8               | 3,19E+09 | 8,8E+09  | 8,75E+09 | 2,39E+09 | 2,12E+09 | 1,74E+09 |
| G1TEH2               | 3,67E+08 | 2,93E+08 | 3,41E+08 | 3,6E+08  | 2,83E+08 | 2,49E+08 |
| G1TEI0               | 0        | 1,14E+09 | 1,51E+09 | 2,13E+09 | 1,17E+09 | 1,29E+09 |
| G1TEI1;U3KNK5        | 3,7E+09  | 1,49E+09 | 1,56E+09 | 4,53E+09 | 4,49E+09 | 4,99E+09 |
| G1TEI2               | 2,78E+09 | 4,84E+08 | 5,66E+08 | 7,73E+08 | 1,83E+09 | 1,93E+09 |
| G1TEK3               | 4,58E+08 | 0        | 0        | 0        | 0        | 2,38E+08 |
| G1TEM5               | 2,32E+09 | 2,44E+09 | 2,51E+09 | 2,66E+09 | 3,14E+09 | 3,66E+09 |
| G1TEM7               | 5,82E+09 | 2,88E+10 | 2,76E+10 | 6,9E+09  | 7,6E+09  | 6,54E+09 |
| G1TEN1               | 1,39E+09 | 1,5E+09  | 1,2E+09  | 8,84E+08 | 8,81E+08 | 8,96E+08 |
| G1TEN4;U3KNV4        | 1,23E+10 | 4,79E+09 | 5,93E+09 | 7,26E+09 | 7,92E+09 | 8,69E+09 |
| G1TEN5               | 5,27E+09 | 6,69E+08 | 7,3E+08  | 6,01E+09 | 5,03E+09 | 6,06E+09 |
| G1TEN9               | 1,6E+08  | 0        | 0        | 1,03E+08 | 0        | 0        |
| G1TEP2               | 6,07E+08 | 0        | 0        | 4,83E+08 | 0        | 0        |
| G1TEQ9               | 0        | 0        | 3,48E+08 | 0        | 0        | 0        |
| G1TER3               | 1,18E+10 | 4,07E+09 | 4,01E+09 | 4,84E+10 | 5,62E+10 | 5,64E+10 |
| G1TES0;G1TTQ1        | 0        | 0        | 0        | 1,29E+08 | 0        | 0        |
| G1TES1               | 0        | 0        | 0        | 0        | 0        | 39420000 |
| G1TES2;G1SEZ3;G1U0F8 | 8,78E+09 | 4,51E+09 | 4,07E+09 | 7,25E+09 | 9,76E+09 | 1,08E+10 |
| G1TES5               | 1,65E+08 | 0        | 0        | 1,1E+08  | 1,11E+08 | 0        |
| G1TES6               | 3,38E+10 | 1,11E+10 | 9,82E+09 | 1,42E+10 | 1,17E+10 | 1,08E+10 |
| G1TET2               | 1,36E+09 | 2,62E+09 | 2,64E+09 | 1,29E+09 | 1,26E+09 | 1,98E+09 |
| G1TET3               | 5,09E+08 | 1,03E+08 | 3,37E+08 | 2,52E+08 | 3,29E+08 | 2,84E+08 |
| U3KPF0;G1TEU5        | 3,48E+08 | 1,9E+09  | 2,79E+09 | 3,04E+08 | 3,84E+08 | 3,47E+08 |
| G1TEU8               | 3,61E+08 | 6,04E+08 | 6,29E+08 | 2,37E+08 | 3,75E+08 | 0        |
| G1TEV2               | 1,69E+09 | 4,02E+08 | 4,7E+08  | 1,34E+09 | 1,54E+09 | 1,44E+09 |
| G1TEW3;G1U118        | 2,36E+09 | 8,96E+09 | 8,65E+09 | 1,21E+09 | 1,37E+09 | 1,16E+09 |
| G1TEW4               | 1,02E+08 | 1,74E+08 | 1,59E+08 | 0        | 0        | 0        |
| G1TEZ1               | 8,86E+08 | 1,43E+08 | 1,43E+08 | 95500000 | 0        | 0        |
| G1TF14               | 5,33E+09 | 3,59E+10 | 5,04E+10 | 2,26E+09 | 3,24E+09 | 2,47E+09 |
| G1TF32               | 7,56E+09 | 1,81E+09 | 1,75E+09 | 7,76E+09 | 6E+09    | 4,62E+09 |

|                      |          |          |          |          |          |          |
|----------------------|----------|----------|----------|----------|----------|----------|
| G1TF72               | 9,6E+08  | 4,5E+08  | 4,77E+08 | 6,98E+08 | 7,85E+08 | 1,12E+09 |
| G1TF80;G1SWM0        | 1,59E+08 | 0        | 0        | 1,03E+08 | 1,2E+08  | 0        |
| G1TF82               | 3,56E+08 | 4,93E+08 | 1,06E+09 | 0        | 3,63E+08 | 0        |
| G1TFB5               | 3,57E+09 | 1,45E+09 | 1,96E+09 | 3,46E+09 | 2,39E+09 | 1,93E+09 |
| G1TFD8               | 7,32E+08 | 1,49E+08 | 1,47E+08 | 2,39E+08 | 1,95E+08 | 2,04E+08 |
| G1TFE0               | 3,33E+09 | 6,17E+09 | 5,68E+09 | 3,89E+09 | 2,46E+09 | 1,6E+09  |
| G1TFE8;G1TTE5        | 1,15E+09 | 8,04E+09 | 6,26E+09 | 1,86E+09 | 1,59E+09 | 1,87E+09 |
| U3KM48;G1TFI4        | 3,23E+08 | 1,31E+09 | 6,67E+08 | 3,26E+08 | 3,46E+08 | 0        |
| G1TFK0               | 0        | 0        | 0        | 0        | 0        | 1,26E+08 |
| G1TFL3               | 3,3E+09  | 1,39E+10 | 1,45E+10 | 2,8E+09  | 2,73E+09 | 2,54E+09 |
| G1TFM5;U3KMN4        | 8,29E+09 | 1,33E+10 | 1,31E+10 | 1,14E+10 | 1,51E+10 | 1,39E+10 |
| G1TFR5               | 0        | 0        | 0        | 32049000 | 0        | 0        |
| G1TFS6;U3KPF2        | 0        | 4,58E+08 | 5,92E+08 | 0        | 0        | 0        |
| G1TFT4;G1TTY8        | 0        | 4,13E+08 | 5,47E+08 | 7,03E+08 | 8,28E+08 | 6,33E+08 |
| G1TFU9               | 9,42E+08 | 4,09E+08 | 7,17E+08 | 5,76E+08 | 6,26E+08 | 6,68E+08 |
| G1TFV2               | 0        | 1,34E+08 | 0        | 0        | 0        | 0        |
| G1TFV8               | 2,07E+08 | 1,34E+08 | 0        | 0        | 0        | 0        |
| G1TFW8               | 0        | 0        | 0        | 0        | 0        | 9064800  |
| G1TFX7;G1T421        | 1,49E+08 | 2,94E+08 | 1,37E+09 | 1,68E+08 | 1,57E+08 | 1,56E+08 |
| G1TFY8               | 2,28E+09 | 8,43E+08 | 7,63E+08 | 8,85E+08 | 1,02E+09 | 1,44E+09 |
| G1TFZ6               | 2,96E+08 | 9,79E+08 | 8,77E+08 | 0        | 2,91E+08 | 0        |
| G1TFZ7               | 1,55E+08 | 3,32E+09 | 4,17E+09 | 4,95E+08 | 8,93E+08 | 6,64E+08 |
| G1TG03               | 1,82E+08 | 0        | 0        | 0        | 0        | 0        |
| G1TG28               | 7,3E+09  | 2,78E+09 | 3,54E+09 | 1,1E+09  | 2,14E+09 | 1,62E+09 |
| G1TG30;G1TUS9;P00563 | 0        | 0        | 2,8E+08  | 0        | 0        | 0        |
| G1TG89;U3KPI0;G1TPZ0 | 2,58E+09 | 5,38E+09 | 6,02E+09 | 2,83E+09 | 2,65E+09 | 2,12E+09 |
| G1TGA8               | 7,91E+09 | 3,84E+09 | 3,2E+09  | 2,4E+10  | 1,58E+10 | 1,3E+10  |
| G1TGD9               | 5,82E+08 | 0        | 0        | 1,07E+09 | 9,53E+08 | 1,15E+09 |
| G1TWX4;G1TGF1;G1T1F5 | 4,27E+09 | 1,14E+10 | 1,43E+10 | 1,45E+09 | 1,94E+09 | 2,35E+09 |
| G1TGH1               | 3,56E+08 | 0        | 0        | 0        | 76514000 | 78505000 |
| G1TGH4               | 0        | 0        | 0        | 5,4E+08  | 2,69E+08 | 1,43E+08 |
| G1TGK9               | 2,11E+09 | 1,02E+09 | 1,26E+09 | 1,64E+09 | 1,28E+09 | 8,48E+08 |
| G1TGM9               | 1,85E+08 | 1,78E+08 | 0        | 0        | 0        | 0        |
| G1TGP7               | 79779000 | 0        | 0        | 62921000 | 68646000 | 0        |
| G1TGT5               | 6,21E+09 | 2,06E+09 | 1,98E+09 | 5,08E+09 | 3,48E+09 | 2,12E+09 |
| G1TGT8               | 2,25E+08 | 77770000 | 71272000 | 1,94E+08 | 3,69E+08 | 4,1E+08  |
| G1TGW1;G1TLV8;G1SPI8 | 9,34E+08 | 5,78E+09 | 5,55E+09 | 4,17E+08 | 8,38E+08 | 6,87E+08 |
| G1TGX2               | 3,26E+08 | 2,09E+08 | 2,57E+08 | 1,8E+08  | 2,52E+08 | 2,09E+08 |
| G1TGX6;G1U296        | 2,58E+08 | 3,81E+08 | 2,68E+08 | 2,55E+09 | 2,3E+09  | 2,1E+09  |
| G1TGZ1               | 0        | 0        | 1,69E+08 | 0        | 0        | 0        |
| G1TGZ6               | 0        | 0        | 0        | 4,18E+08 | 0        | 0        |
| G1TGZ8               | 87249000 | 4,79E+08 | 4,74E+08 | 1,3E+08  | 0        | 0        |
| G1TH06               | 3,14E+09 | 2,24E+10 | 2,99E+10 | 1,71E+09 | 1,94E+09 | 1,97E+09 |
| G1TH09;G1TUS2        | 1,9E+09  | 5,43E+09 | 5E+09    | 1,75E+09 | 1,67E+09 | 1,19E+09 |
| G1TH12               | 1,71E+09 | 4,06E+08 | 1,08E+09 | 1,3E+09  | 5,13E+08 | 3,85E+08 |
| G1TH13               | 0        | 0        | 0        | 3,15E+08 | 0        | 1,66E+08 |
| G1TH33               | 2,29E+10 | 6,48E+09 | 6,02E+09 | 1,48E+10 | 1,6E+10  | 1,45E+10 |
| G1TH37               | 1,47E+08 | 4,66E+08 | 0        | 0        | 0        | 0        |
| G1TH48               | 0        | 0        | 1,48E+08 | 0        | 0        | 0        |
| G1TH59;G1SGL7        | 1,52E+09 | 1,24E+09 | 1,16E+09 | 2,06E+09 | 1,78E+09 | 2,19E+09 |

|                      |          |          |          |          |          |          |
|----------------------|----------|----------|----------|----------|----------|----------|
| G1TH83;G1TFZ4        | 1,99E+09 | 7,94E+08 | 6,22E+08 | 4,15E+08 | 3,57E+08 | 6,49E+08 |
| G1TH86;P46629;G1SPC8 | 2,47E+08 | 0        | 0        | 0        | 0        | 0        |
| G1THA5               | 2,35E+08 | 1,09E+08 | 1,39E+08 | 0        | 0        | 1,34E+08 |
| G1THB5               | 1,21E+08 | 0        | 0        | 0        | 0        | 0        |
| G1THF1               | 3,08E+09 | 3,42E+08 | 4,18E+08 | 4,61E+08 | 4,37E+08 | 6,03E+08 |
| G1THG5               | 0        | 0        | 0        | 0        | 0        | 1,27E+08 |
| G1THH4               | 0        | 1,81E+08 | 1,21E+08 | 0        | 0        | 0        |
| G1THH7               | 2,83E+09 | 1,07E+09 | 1,3E+09  | 1,24E+09 | 6,72E+08 | 5,4E+08  |
| G1TTB2;G1THH9        | 0        | 2,68E+08 | 0        | 0        | 0        | 0        |
| G1THL4;G1T107;G1TZG8 | 1,49E+09 | 6,39E+09 | 7,09E+09 | 1,12E+09 | 1,3E+09  | 1,11E+09 |
| G1THP8;G1STE8        | 3,21E+08 | 7,33E+08 | 8,04E+08 | 5,12E+08 | 0        | 0        |
| G1THQ5               | 9,28E+08 | 3,92E+08 | 2,18E+08 | 1,2E+09  | 1,53E+09 | 9,19E+08 |
| G1THR4               | 1,31E+09 | 4,03E+08 | 3,94E+08 | 1,36E+09 | 1,36E+09 | 1,22E+09 |
| G1THS6               | 1,52E+08 | 0        | 0        | 0        | 0        | 0        |
| G1THT8;G1TQC7        | 2,19E+08 | 5,92E+08 | 6,81E+08 | 1,75E+09 | 1,1E+09  | 1,95E+09 |
| O77541;G1THU6        | 7,58E+08 | 0        | 0        | 1,29E+09 | 1,86E+09 | 1,24E+09 |
| G1U5R4;G1THV8        | 1,24E+09 | 5,18E+08 | 4,87E+08 | 3,22E+09 | 3,98E+09 | 5,47E+09 |
| G1THW3               | 6,28E+08 | 2,29E+08 | 3,01E+08 | 2,5E+09  | 1,31E+09 | 8,69E+08 |
| Q28678;G1THY2        | 0        | 0        | 0        | 0        | 0        | 1,87E+08 |
| G1THY3               | 0        | 0        | 2,27E+08 | 0        | 0        | 0        |
| G1THY5               | 2,34E+08 | 5,54E+08 | 4,75E+08 | 0        | 0        | 0        |
| G1THZ6;P01870        | 0        | 0        | 0        | 9,66E+08 | 5,25E+08 | 5,47E+08 |
| G1TI00               | 1,17E+09 | 2,97E+08 | 3,09E+08 | 1,48E+09 | 1,5E+09  | 8,66E+08 |
| G1TI02               | 0        | 0        | 0        | 80639000 | 0        | 0        |
| G1TI08               | 0        | 0        | 0        | 0        | 0        | 76134000 |
| G1TI18               | 0        | 0        | 1,91E+08 | 0        | 46303000 | 0        |
| G1TI27;Q9XSC2        | 7,5E+08  | 4,21E+08 | 4,13E+08 | 1,81E+09 | 2,4E+09  | 1,55E+09 |
| G1TI39               | 3,74E+08 | 1,23E+09 | 1,64E+09 | 2,61E+08 | 0        | 1,59E+08 |
| G1TI40               | 3,68E+09 | 5,22E+09 | 5,91E+09 | 9,01E+09 | 8,74E+09 | 1,07E+10 |
| G1TI55               | 7,8E+09  | 2,73E+09 | 2,49E+09 | 8,79E+09 | 1,03E+10 | 1,5E+10  |
| G1TI56               | 1,65E+09 | 6,41E+09 | 6,53E+09 | 4,43E+09 | 5,14E+09 | 6,33E+09 |
| G1TI59;G1TVB5        | 3,51E+08 | 0        | 0        | 5,19E+08 | 1,03E+09 | 6,89E+08 |
| G1TI64               | 1,64E+08 | 0        | 0        | 1,53E+08 | 0        | 0        |
| G1TI71               | 5,82E+08 | 3,03E+09 | 2,74E+09 | 8,63E+08 | 1,4E+09  | 7,06E+08 |
| G1TI97               | 0        | 1,15E+09 | 5,13E+08 | 0        | 0        | 0        |
| G1TIB4               | 7,9E+08  | 9E+09    | 1,32E+10 | 6,76E+08 | 9,99E+08 | 1,47E+09 |
| G1TIB7               | 48616000 | 0        | 0        | 0        | 0        | 0        |
| G1TIC4               | 0        | 2,74E+08 | 6,63E+08 | 0        | 1,45E+08 | 95279000 |
| G1TIC9               | 5,9E+08  | 3,12E+08 | 3,99E+08 | 4,32E+09 | 2,93E+09 | 3,72E+09 |
| G1TID0               | 0        | 0        | 35106000 | 0        | 0        | 0        |
| G1TID1               | 0        | 0        | 0        | 1,77E+09 | 1,79E+09 | 2,21E+09 |
| G1TID8;G1TZK4        | 0        | 2,88E+08 | 2,94E+08 | 0        | 0        | 0        |
| G1TIE9               | 52553000 | 6,1E+08  | 8,95E+08 | 69775000 | 60780000 | 40286000 |
| G1TIF1               | 0        | 2,56E+08 | 1,67E+08 | 1,43E+08 | 1,32E+08 | 1,51E+08 |
| P37153;G1TIF8        | 2,46E+09 | 2,24E+08 | 2,24E+08 | 0        | 0        | 0        |
| G1TII2               | 6,34E+09 | 9,05E+08 | 8,65E+08 | 2,95E+09 | 2,86E+09 | 1,92E+09 |
| G1TIJ7               | 3,7E+08  | 1,96E+08 | 1,75E+08 | 9,66E+08 | 9,68E+08 | 1,18E+09 |
| G1TIM0               | 5,56E+08 | 2,48E+08 | 1,69E+08 | 3,62E+08 | 2,58E+08 | 1,56E+08 |
| G1TIR7               | 1,13E+09 | 1,65E+09 | 1,51E+09 | 1,69E+09 | 2,51E+09 | 2,33E+09 |
| G1TIS5               | 3,11E+09 | 8,96E+09 | 1,04E+10 | 1,23E+09 | 1,47E+09 | 1,46E+09 |

|                      |          |          |          |          |          |          |
|----------------------|----------|----------|----------|----------|----------|----------|
| G1TIT1               | 3,91E+09 | 7,03E+08 | 9,25E+08 | 4,19E+09 | 3,47E+09 | 3,02E+09 |
| G1TIV8               | 0        | 0        | 0        | 3,12E+08 | 3,4E+08  | 3,54E+08 |
| G1TIW9               | 1,09E+08 | 0        | 1,16E+08 | 0        | 0        | 0        |
| G1TIZ1;G1TYH5        | 0        | 8,18E+08 | 9,77E+08 | 2,09E+08 | 3,93E+08 | 2,5E+08  |
| G1TIZ2               | 1,01E+10 | 2,71E+09 | 2,53E+09 | 1,85E+10 | 1,52E+10 | 1,61E+10 |
| G1TIZ5               | 2,82E+10 | 1,33E+10 | 1,35E+10 | 3,25E+10 | 3E+10    | 5,06E+10 |
| G1TIZ9               | 0        | 0        | 0        | 1,74E+08 | 0        | 0        |
| G1TJ04               | 1,11E+08 | 0        | 0        | 0        | 0        | 0        |
| G1TJ19               | 3,73E+09 | 1,09E+09 | 1,1E+09  | 9,1E+09  | 1,2E+10  | 1,55E+10 |
| G1TJ33;G1SVD8        | 0        | 0        | 0        | 0        | 3,52E+08 | 0        |
| G1TJ36               | 2,09E+08 | 0        | 2,19E+08 | 3,53E+08 | 3,4E+08  | 3,94E+08 |
| P48738;G1TJ38        | 1,58E+08 | 3,15E+08 | 5,05E+08 | 0        | 0        | 0        |
| G1TJ80;G1TMR3        | 1,35E+09 | 3,69E+08 | 6,14E+08 | 4,54E+09 | 4,64E+09 | 5,35E+09 |
| G1TJC3               | 3,67E+09 | 1,94E+10 | 1,56E+10 | 5,49E+08 | 8,66E+08 | 7,45E+08 |
| G1TJG3               | 3,93E+09 | 1,52E+10 | 1,63E+10 | 6,82E+09 | 9,58E+09 | 9,31E+09 |
| G1TJG6;P46406;G1TYG1 | 7,33E+10 | 2,10E+11 | 2,18E+11 | 7,37E+10 | 1,03E+11 | 6,13E+10 |
| G1TJH2;G1TN82;G1SGR6 | 1,03E+09 | 6,27E+09 | 5,16E+09 | 1,9E+09  | 1,52E+09 | 1,19E+09 |
| G1TJK2               | 0        | 0        | 0        | 0        | 6,51E+08 | 0        |
| G1TJL0               | 1,21E+08 | 0        | 1,01E+08 | 0        | 0        | 0        |
| G1TJL3               | 1,53E+08 | 0        | 93343000 | 1,46E+08 | 0        | 0        |
| G1TJN6;G1U438        | 4,25E+08 | 0        | 0        | 0        | 0        | 0        |
| G1TJN7;U3KM51;G1T8S6 | 2,29E+09 | 5,64E+08 | 4,65E+08 | 2,83E+09 | 2,46E+09 | 1,38E+09 |
| G1TJP0               | 2,72E+08 | 9,39E+08 | 1,19E+09 | 0        | 3,32E+08 | 3,48E+08 |
| G1TJR3;G1TI85;G1U054 | 2,65E+09 | 1,26E+10 | 9,55E+09 | 3,96E+09 | 4,47E+09 | 3,87E+09 |
| G1TJR5               | 1,21E+08 | 6,02E+08 | 5,75E+08 | 1,6E+08  | 1,52E+08 | 0        |
| G1TJS2               | 4,06E+09 | 1,34E+09 | 1,46E+09 | 2,71E+09 | 2,79E+09 | 3,04E+09 |
| G1TJV3               | 1,23E+09 | 0        | 0        | 5,1E+08  | 3,9E+08  | 3,56E+08 |
| G1TJW1;G1T3D9        | 9,7E+09  | 3,84E+10 | 4,1E+10  | 9,5E+09  | 9,37E+09 | 8,23E+09 |
| G1TJW3;G1TQ82        | 2,28E+10 | 1,69E+10 | 1,7E+10  | 3,44E+10 | 4,04E+10 | 3,84E+10 |
| G1TJW7               | 2,33E+08 | 1,32E+08 | 1,23E+08 | 1,18E+08 | 1,3E+08  | 92079000 |
| G1TJW8               | 5,69E+08 | 1,39E+09 | 2E+09    | 4,48E+08 | 3,31E+08 | 3,8E+08  |
| G1TJX7;G1TYK6        | 2,76E+08 | 1,42E+09 | 1,62E+09 | 0        | 2,26E+08 | 1,89E+08 |
| G1TJY2               | 2,03E+09 | 4,42E+08 | 3,07E+08 | 2,85E+09 | 2,12E+09 | 2,42E+09 |
| G1TK17               | 1,55E+09 | 4,97E+09 | 5,36E+09 | 1,58E+09 | 1,72E+09 | 1,49E+09 |
| G1TK32               | 0        | 9,79E+08 | 3,87E+08 | 2,43E+08 | 2,43E+08 | 1,5E+08  |
| G1TK35               | 0        | 0        | 0        | 1,3E+08  | 1,21E+08 | 0        |
| G1TK53               | 0        | 7,04E+08 | 5,84E+08 | 2,47E+08 | 4,96E+08 | 4,66E+08 |
| G1TK63               | 9,6E+08  | 1,73E+09 | 9,75E+08 | 5,42E+09 | 5,29E+09 | 8,89E+09 |
| G1TK72               | 5,34E+08 | 0        | 5,42E+08 | 8,73E+08 | 5,29E+08 | 4,92E+08 |
| G1TK74;G1TK98        | 0        | 0        | 0        | 0        | 1,24E+08 | 0        |
| G1TK81               | 2,27E+08 | 0        | 0        | 0        | 0        | 0        |
| G1TKA2               | 1,38E+08 | 1,01E+08 | 1,41E+08 | 1,16E+09 | 8,6E+08  | 8,82E+08 |
| G1TKC4               | 2,41E+09 | 5,02E+09 | 5,18E+09 | 1,42E+09 | 1,44E+09 | 1,36E+09 |
| G1TKE0               | 5,36E+08 | 1,11E+08 | 0        | 5,84E+08 | 4,42E+08 | 4,08E+08 |
| G1TKE3               | 7,07E+09 | 4,58E+10 | 5,45E+10 | 1,46E+09 | 2,02E+09 | 2,35E+09 |
| G1TKE8               | 7,05E+08 | 0        | 0        | 1,4E+09  | 1,21E+09 | 1,02E+09 |
| G1TKG2               | 2,24E+09 | 4,89E+08 | 3,73E+08 | 3,78E+09 | 1,78E+09 | 1,37E+09 |
| G1TKH3;P09212        | 6,07E+09 | 2,21E+10 | 1,84E+10 | 8,72E+09 | 1,08E+10 | 1,29E+10 |
| G1TKI8               | 0        | 5,74E+09 | 6,94E+09 | 0        | 0        | 0        |
| U3KMX6;G1TKK2        | 9,42E+08 | 9,12E+09 | 7,11E+09 | 2,17E+08 | 2,86E+08 | 3,93E+08 |

|                      |          |          |          |          |          |          |
|----------------------|----------|----------|----------|----------|----------|----------|
| G1TM83;G1TKL0        | 1,77E+09 | 1,92E+09 | 2,14E+09 | 2,49E+09 | 2,2E+09  | 3,38E+09 |
| G1TKL2               | 1,17E+10 | 5,53E+10 | 5,98E+10 | 6,76E+09 | 8,97E+09 | 1,23E+10 |
| G1TKL9               | 0        | 0        | 0        | 0        | 0        | 98650000 |
| G1TKN4;G1SY93        | 4,45E+09 | 3,65E+09 | 3,8E+09  | 4,56E+09 | 4,72E+09 | 2,51E+09 |
| G1TKN7;G1TJM8;G1TTS2 | 1,19E+10 | 1,39E+10 | 1,43E+10 | 2,31E+10 | 3,06E+10 | 3,23E+10 |
| G1TKS5               | 1,82E+09 | 2,32E+08 | 1,8E+08  | 2,24E+09 | 3,07E+09 | 2,74E+09 |
| G1TKV4               | 0        | 0        | 0        | 0        | 41081000 | 0        |
| G1TKX5               | 2,06E+08 | 0        | 1,27E+08 | 1,94E+08 | 4,23E+08 | 5,73E+08 |
| G1TKX7               | 0        | 0        | 0        | 1,95E+08 | 2,62E+08 | 0        |
| G1TKY3;P06814        | 6,14E+09 | 1,76E+10 | 1,98E+10 | 1,82E+09 | 1,61E+09 | 1,33E+09 |
| G1TKY7               | 2,33E+08 | 0        | 0        | 9,32E+08 | 1,02E+09 | 4,08E+08 |
| G1TL06;G1U3I6;G1TL63 | 1,01E+10 | 3,71E+10 | 3,53E+10 | 1,17E+10 | 1,11E+10 | 7,42E+09 |
| G1TL18               | 0        | 0        | 0        | 2,99E+09 | 0        | 0        |
| G1TL29;G1TWZ0        | 0        | 5,69E+08 | 5,88E+08 | 0        | 0        | 0        |
| G1TL55               | 1,02E+09 | 0        | 0        | 4,73E+08 | 5,14E+08 | 5,02E+08 |
| G1TL80               | 1,84E+09 | 6,31E+08 | 5,85E+08 | 1,27E+09 | 1,23E+09 | 1,75E+09 |
| G1TLA8               | 82181000 | 0        | 0        | 0        | 36288000 | 0        |
| G1TLD3               | 2,44E+10 | 7,8E+09  | 6,71E+09 | 4,32E+10 | 4,53E+10 | 6,2E+10  |
| G1TLE3               | 0        | 0        | 0        | 0        | 0        | 2,32E+09 |
| G1TLE4               | 1,82E+10 | 4,91E+09 | 5,42E+09 | 9,35E+09 | 1,17E+10 | 9,98E+09 |
| G1TLH1               | 1,08E+08 | 2,21E+08 | 1,21E+08 | 3,85E+08 | 1,89E+08 | 2,87E+08 |
| G1TLK9;G1SS41        | 2,73E+10 | 5,23E+09 | 5,41E+09 | 1,3E+10  | 1,16E+10 | 1,04E+10 |
| G1TLL7;G1SSV0        | 1,57E+09 | 4,27E+08 | 7,95E+08 | 5,11E+09 | 3,67E+09 | 5,45E+09 |
| G1TLN2;G1TZX4        | 1,22E+09 | 3,6E+08  | 2,25E+08 | 8,1E+08  | 7,46E+08 | 6,56E+08 |
| G1TLQ8               | 7,26E+09 | 1,03E+10 | 1,09E+10 | 3,63E+09 | 3,83E+09 | 4,53E+09 |
| G1TLS9               | 0        | 0        | 85473000 | 0        | 1,97E+08 | 1,23E+08 |
| G1TSW1;G1TLU5;G1TG12 | 1,26E+08 | 6,62E+08 | 7,38E+08 | 3,04E+08 | 2,07E+08 | 3,68E+08 |
| G1TLW3               | 1,6E+10  | 1,18E+10 | 1,28E+10 | 1,07E+10 | 1,18E+10 | 1,22E+10 |
| G1TLY0               | 3,94E+08 | 9,55E+08 | 1,51E+09 | 5,77E+08 | 8,2E+08  | 6,82E+08 |
| G1TLZ2;G1SYN5        | 3,12E+09 | 1,76E+09 | 1,74E+09 | 9,1E+09  | 9,71E+09 | 9,46E+09 |
| G1TM00               | 0        | 5,16E+08 | 4,05E+08 | 0        | 0        | 0        |
| G1TM33               | 0        | 0        | 0        | 0        | 1,41E+08 | 0        |
| G1TM35               | 3,61E+09 | 1,22E+09 | 1E+09    | 3,65E+09 | 4,99E+09 | 5,93E+09 |
| G1TM42               | 0        | 4,21E+08 | 4,72E+08 | 2,3E+08  | 3,49E+08 | 4,87E+08 |
| G1TM45               | 0        | 0        | 0        | 3,52E+08 | 2,55E+08 | 0        |
| G1TM48               | 4,58E+09 | 1,27E+09 | 1,13E+09 | 7,04E+09 | 8,58E+09 | 8,83E+09 |
| G1TM55;G1TTA9;G1U5C0 | 2,68E+09 | 2,46E+10 | 2,37E+10 | 6,61E+09 | 7,86E+09 | 6,62E+09 |
| G1TM60               | 1,84E+10 | 2,48E+09 | 2,05E+09 | 2,27E+10 | 1,85E+10 | 1,45E+10 |
| G1TM62               | 1,48E+10 | 6,33E+09 | 5,34E+09 | 4,65E+10 | 5,45E+10 | 7,33E+10 |
| G1TM73               | 0        | 0        | 2,17E+08 | 0        | 0        | 0        |
| G1TM82               | 9,55E+08 | 1,04E+10 | 1,17E+10 | 1,11E+09 | 1,81E+09 | 1,68E+09 |
| G1TM95;G1TMH7        | 2,27E+09 | 2,3E+08  | 1,58E+08 | 6,09E+08 | 9,83E+08 | 1,2E+09  |
| G1TMA2;U3KPI1        | 2,1E+08  | 0        | 0        | 0        | 0        | 0        |
| G1TMD0               | 1,24E+09 | 2,67E+08 | 2,68E+08 | 2,05E+09 | 1,88E+09 | 2,08E+09 |
| G1TMD8               | 2,08E+08 | 6,55E+08 | 5,19E+08 | 1,85E+08 | 2,39E+08 | 1,35E+08 |
| G1TME5               | 1,42E+08 | 0        | 0        | 1,32E+08 | 82617000 | 0        |
| G1TME7               | 3E+09    | 5,23E+09 | 4,82E+09 | 2E+09    | 2,65E+09 | 2,09E+09 |
| G1TMG9;G1TRF4        | 4,12E+08 | 3,07E+08 | 2,17E+08 | 1,71E+09 | 5,87E+08 | 4,68E+08 |
| G1TMI5               | 0        | 0        | 0        | 0        | 3,41E+08 | 4,57E+08 |
| G1TMM5               | 6,25E+08 | 1,97E+08 | 3,06E+08 | 8,47E+08 | 7,01E+08 | 3,51E+08 |

|                      |          |          |          |          |          |          |
|----------------------|----------|----------|----------|----------|----------|----------|
| G1TMM7               | 2,9E+08  | 1,97E+09 | 1,89E+09 | 1,21E+09 | 1,74E+09 | 1,7E+09  |
| G1TMP1;G1U758        | 0        | 0        | 0        | 0        | 0        | 2,33E+08 |
| G1TMP7               | 0        | 0        | 0        | 0        | 1,22E+08 | 0        |
| G1TMQ5               | 6,71E+08 | 6,65E+08 | 7,28E+08 | 1,13E+09 | 8,5E+08  | 9,42E+08 |
| G1TMQ8               | 0        | 0        | 0        | 4,12E+08 | 0        | 3,51E+08 |
| G1TMS5               | 1,39E+10 | 4,91E+10 | 5,2E+10  | 5,83E+09 | 7,3E+09  | 6,65E+09 |
| G1TMS7               | 1,42E+08 | 1,18E+08 | 1,4E+08  | 6,46E+08 | 2,63E+08 | 2,19E+08 |
| G1TMU1               | 1,44E+09 | 1,99E+08 | 2,4E+08  | 2,02E+08 | 2,75E+08 | 3,32E+08 |
| G1TMU2;G1U3W7        | 1,41E+10 | 3,32E+10 | 3,27E+10 | 1,37E+10 | 1,61E+10 | 1,91E+10 |
| G1TMV1;G1T6M5        | 6,96E+09 | 3,4E+10  | 3,37E+10 | 3,98E+09 | 4,93E+09 | 6,54E+09 |
| G1TMV6               | 0        | 3,96E+08 | 3,11E+08 | 2,92E+08 | 0        | 0        |
| G1TMW2               | 7,58E+08 | 1,36E+09 | 1,5E+09  | 4,24E+08 | 6,82E+08 | 5,9E+08  |
| G1TMZ2               | 2,76E+09 | 6,64E+08 | 7,53E+08 | 6,71E+08 | 7,25E+08 | 6,87E+08 |
| G1TMZ6               | 1,16E+10 | 3,54E+09 | 2,92E+09 | 6,23E+09 | 7,11E+09 | 7,81E+09 |
| G1TN14               | 1,63E+08 | 4,64E+08 | 4,33E+08 | 7,37E+08 | 7,35E+08 | 5,96E+08 |
| G1TN20               | 8,02E+09 | 3,81E+09 | 3,24E+09 | 1,89E+10 | 2,32E+10 | 1,35E+10 |
| G1TN29               | 0        | 0        | 1,42E+08 | 0        | 0        | 0        |
| G1TN33               | 1,48E+08 | 1,04E+09 | 1,33E+09 | 0        | 0        | 0        |
| G1TN42               | 8,09E+08 | 2,76E+08 | 1,63E+08 | 1,73E+08 | 2,25E+08 | 1,96E+08 |
| G1TN62;G1TX41        | 5,8E+09  | 2,14E+10 | 2,17E+10 | 1,38E+10 | 1,49E+10 | 1,91E+10 |
| G1TN80;G1TL01        | 7,78E+08 | 1,47E+08 | 0        | 3,1E+08  | 2,16E+08 | 2,1E+08  |
| G1TN86               | 1,11E+09 | 1,54E+09 | 1,44E+09 | 6,19E+08 | 9,87E+08 | 9,24E+08 |
| G1TN89               | 1,41E+09 | 3,75E+08 | 4,67E+08 | 3,25E+10 | 2,06E+10 | 2,49E+10 |
| G1TNA6               | 3,23E+08 | 2,97E+08 | 3,03E+08 | 0        | 0        | 0        |
| U3KPP2;G1TNB4        | 0        | 71258000 | 0        | 0        | 0        | 0        |
| G1TNF3               | 0        | 0        | 0        | 0        | 0        | 90779000 |
| G1TNH9               | 1,24E+09 | 2,22E+09 | 2,17E+09 | 2,06E+09 | 1,61E+09 | 1,33E+09 |
| G1TNI4               | 0        | 2,66E+08 | 0        | 1,2E+09  | 8,97E+08 | 7,53E+08 |
| G1TNJ2               | 90535000 | 8,2E+09  | 7,97E+09 | 1,3E+08  | 32806000 | 1,19E+08 |
| G1TNK9;G1TNV4        | 0        | 0        | 0        | 1,66E+08 | 0        | 0        |
| G1TNL6;G1U4H3        | 5,86E+08 | 5,24E+09 | 3,91E+09 | 5,48E+08 | 7,5E+08  | 7,87E+08 |
| G1TNM3;G1TG00        | 7,98E+09 | 2,45E+10 | 2,56E+10 | 8,72E+09 | 8,53E+09 | 6,01E+09 |
| G1TNM4               | 0        | 0        | 0        | 0        | 0        | 0        |
| G1TNP7               | 0        | 1,98E+08 | 1,74E+08 | 0        | 0        | 0        |
| G1TNT7               | 1,11E+09 | 0        | 0        | 4,29E+08 | 3,77E+08 | 3,28E+08 |
| G1TNT9               | 1,95E+08 | 0        | 0        | 8,72E+08 | 3,95E+08 | 5,59E+08 |
| G1TNU3               | 6,35E+08 | 1,69E+08 | 2,02E+08 | 6,68E+08 | 8,6E+08  | 1,03E+09 |
| G1TNV7               | 2,95E+09 | 6,14E+08 | 5,39E+08 | 3,07E+09 | 2,5E+09  | 2,17E+09 |
| G1TNW8               | 1,79E+09 | 6,8E+08  | 4,8E+08  | 2,1E+09  | 1,96E+09 | 1,98E+09 |
| G1TNX6               | 0        | 0        | 6,16E+08 | 0        | 0        | 0        |
| G1TNX7;Q28719;G1SMQ0 | 4,69E+08 | 1,6E+09  | 1,41E+09 | 6,67E+08 | 7,16E+08 | 4,02E+08 |
| G1TNY1               | 1,04E+10 | 4,71E+09 | 4,94E+09 | 9,56E+09 | 1,37E+10 | 1,58E+10 |
| G1TNZ3               | 3,09E+09 | 9,43E+08 | 8,37E+08 | 1,09E+09 | 1,03E+09 | 5,6E+08  |
| G1TNZ4;P98118        | 0        | 0        | 0        | 98523000 | 0        | 0        |
| G1TP15               | 3,21E+09 | 3,64E+09 | 3,67E+09 | 1,74E+09 | 1,3E+09  | 9,99E+08 |
| G1TP23               | 1,18E+09 | 0        | 0        | 2,2E+09  | 2,54E+09 | 6,41E+09 |
| G1TP25               | 1,46E+08 | 4,92E+09 | 6,67E+09 | 7,11E+08 | 7,5E+08  | 1,45E+09 |
| G1TP30               | 6,55E+08 | 3,47E+09 | 3,48E+09 | 8,2E+08  | 9,04E+08 | 9,6E+08  |
| G1TP59;U3KLU1        | 2,04E+10 | 3,01E+09 | 3,09E+09 | 1,57E+10 | 1,51E+10 | 1,55E+10 |
| G1TP80               | 0        | 0        | 0        | 0        | 0        | 3,1E+08  |



|                      |          |          |          |          |          |          |
|----------------------|----------|----------|----------|----------|----------|----------|
| G1TP81;G1SJX0        | 0        | 1,33E+08 | 1,38E+08 | 0        | 0        | 0        |
| G1TPB1               | 3,75E+08 | 54136000 | 43880000 | 1,7E+08  | 1,05E+08 | 0        |
| G1TPC5               | 6,81E+08 | 3,86E+09 | 3,7E+09  | 9,78E+08 | 1,41E+09 | 1,29E+09 |
| G1TPD4               | 0        | 0        | 90940000 | 0        | 0        | 0        |
| G1TPG3;G1SZI5        | 9,6E+09  | 2,74E+10 | 2,71E+10 | 1,19E+10 | 1,2E+10  | 9,85E+09 |
| G1TPIO               | 2,81E+09 | 1,26E+09 | 9,99E+08 | 8,7E+09  | 8,5E+09  | 9,02E+09 |
| G1TPI5               | 1,61E+08 | 0        | 0        | 0        | 0        | 0        |
| G1TPI7               | 0        | 0        | 0        | 0        | 1,27E+08 | 43568000 |
| G1TPK8;P54938        | 8,6E+08  | 1,78E+08 | 1,53E+08 | 1,22E+08 | 0        | 1,32E+08 |
| G1TPL7;G1T090        | 7,89E+08 | 6,33E+09 | 6,25E+09 | 2,01E+09 | 1,72E+09 | 1,3E+09  |
| G1TPN2               | 1,54E+09 | 5,65E+09 | 7,22E+09 | 1,87E+09 | 2,05E+09 | 3,09E+09 |
| G1TPN3               | 3,24E+10 | 3,72E+10 | 4,47E+10 | 2,21E+10 | 2,91E+10 | 3,34E+10 |
| G1TPP1;G1TYB5        | 0        | 0        | 1,24E+08 | 0        | 0        | 0        |
| G1TPP4;G1U3G4        | 0        | 0        | 0        | 0        | 2,36E+08 | 0        |
| G1TPS9               | 1,17E+09 | 5,91E+08 | 5,94E+08 | 4,44E+09 | 3,81E+09 | 5,38E+09 |
| G1TPT3               | 0        | 1,85E+08 | 1,72E+08 | 0        | 0        | 0        |
| G1TPV0;G1TKB3;G1ST96 | 4,5E+09  | 2,36E+10 | 2,24E+10 | 8,4E+09  | 7,77E+09 | 5,48E+09 |
| G1TPV3;G1T168;G1U0Y5 | 5E+09    | 4,91E+09 | 4,36E+09 | 5,28E+09 | 5,53E+09 | 5,83E+09 |
| G1TPV7               | 9,7E+09  | 1,61E+09 | 1,33E+09 | 1,81E+10 | 1,64E+10 | 1,52E+10 |
| G1TPW2               | 1,42E+09 | 2,69E+09 | 2,53E+09 | 7,65E+08 | 7,08E+08 | 6E+08    |
| G1TPY7               | 1,19E+09 | 4,98E+08 | 5,5E+08  | 1,11E+09 | 1,35E+09 | 1,84E+09 |
| G1TPZ1               | 7,1E+10  | 8,67E+10 | 9,01E+10 | 1,48E+09 | 1,48E+09 | 2,36E+09 |
| G1TPZ3               | 1,04E+09 | 3,67E+08 | 3,93E+08 | 6,03E+08 | 6,45E+08 | 9,56E+08 |
| G1TPZ4;G1TH64        | 5,62E+08 | 2,28E+08 | 2,63E+08 | 5,29E+08 | 6,56E+08 | 2,75E+08 |
| G1TQ11               | 4,84E+08 | 0        | 1,42E+08 | 2,74E+08 | 1,39E+08 | 0        |
| G1TQ31;P33674        | 2,12E+09 | 2,54E+09 | 2,63E+09 | 2,66E+09 | 2,01E+09 | 2,23E+09 |
| G1TQ32               | 0        | 0        | 0        | 2,33E+08 | 0        | 0        |
| G1TQ57               | 0        | 0        | 99619000 | 1,22E+08 | 0        | 1,65E+08 |
| G1TQ79               | 8,56E+08 | 1,04E+09 | 4,05E+08 | 3,47E+08 | 5,1E+08  | 4,59E+08 |
| G1TWR1;G1TRK0;G1TQ90 | 2,6E+08  | 3,71E+08 | 2,65E+08 | 1,39E+08 | 1,79E+08 | 4,31E+08 |
| G1TQ97               | 5,62E+08 | 7,05E+08 | 7,78E+08 | 9,08E+09 | 6,31E+09 | 9,55E+09 |
| G1TQA4               | 0        | 0        | 1,64E+08 | 0        | 0        | 0        |
| G1TQD7               | 0        | 3,11E+08 | 3,04E+08 | 0        | 0        | 0        |
| G1TQG1               | 8,23E+09 | 2,67E+09 | 1,85E+09 | 9,19E+09 | 1,09E+10 | 1,37E+10 |
| G1TQG4;G1U2K2        | 6,13E+09 | 1,54E+10 | 2,51E+10 | 1,19E+09 | 3,44E+09 | 2,15E+09 |
| G1TQI2               | 0        | 0        | 3,81E+08 | 0        | 0        | 0        |
| G1TQJ5               | 7,69E+08 | 2,56E+09 | 2,33E+09 | 2,57E+09 | 2,85E+09 | 3,53E+09 |
| G1TQK5               | 0        | 1,26E+09 | 1,07E+09 | 0        | 0        | 0        |
| G1TQL7               | 1,31E+08 | 0        | 0        | 0        | 0        | 91095000 |
| G1TQM9               | 6,98E+09 | 4,68E+10 | 4,54E+10 | 3,96E+09 | 4,55E+09 | 5,28E+09 |
| G1TQP4               | 1,38E+08 | 2,6E+08  | 2,92E+08 | 1,7E+08  | 1,65E+08 | 1,27E+08 |
| G1TQP6               | 1,82E+08 | 2,75E+08 | 2,32E+08 | 0        | 0        | 0        |
| G1TQR0;G1TEM1;G1U4H8 | 2,27E+09 | 2,21E+09 | 2,03E+09 | 2,34E+09 | 1,99E+09 | 1,46E+09 |
| P34826;G1TQR2        | 4,35E+09 | 2,62E+10 | 2,73E+10 | 2,55E+09 | 2,92E+09 | 3,19E+09 |
| G1TQT7               | 0        | 0        | 0        | 0        | 1,76E+08 | 1,84E+08 |
| G1TQV4               | 0        | 0        | 2,78E+08 | 0        | 0        | 0        |
| G1TQW7               | 0        | 0        | 0        | 0        | 63522000 | 0        |
| G1TQX1               | 0        | 4,42E+08 | 1,96E+08 | 1,32E+08 | 1,31E+08 | 0        |
| G1TR00               | 7E+08    | 2,38E+08 | 2,18E+08 | 9,06E+08 | 6,46E+08 | 4,26E+08 |
| G1TR26               | 1,78E+09 | 4,36E+08 | 3,87E+08 | 6,64E+08 | 8,49E+08 | 4,63E+08 |

|                      |          |          |          |          |          |          |
|----------------------|----------|----------|----------|----------|----------|----------|
| G1TWU9;G1TR42        | 0        | 3,06E+08 | 3,44E+08 | 0        | 0        | 0        |
| G1TR82               | 4,22E+10 | 2,12E+11 | 1,89E+11 | 3,59E+10 | 4,56E+10 | 4,68E+10 |
| G1TRA4               | 0        | 0        | 0        | 59695000 | 0        | 0        |
| G1TRA9               | 0        | 0        | 4,92E+08 | 1,06E+09 | 6,85E+08 | 5,32E+08 |
| G1TRE0               | 0        | 0        | 79388000 | 0        | 0        | 0        |
| G1TRF3               | 1,02E+08 | 7,45E+08 | 5,98E+08 | 1,78E+08 | 1,63E+08 | 0        |
| G1TRG8               | 1,96E+10 | 6,08E+09 | 6,18E+09 | 1,28E+10 | 1,08E+10 | 9,84E+09 |
| G1TRG9               | 5,83E+08 | 3,89E+09 | 4,31E+09 | 2,72E+08 | 2,83E+08 | 4,69E+08 |
| G1TRH3               | 6,82E+09 | 6E+09    | 4,88E+09 | 2,89E+09 | 4,99E+09 | 5,77E+09 |
| G1TRH9;G1T4H0        | 1,12E+09 | 1,92E+09 | 2,5E+09  | 1,38E+09 | 1,78E+09 | 1,79E+09 |
| G1TRI3               | 0        | 0        | 0        | 0        | 0        | 2,68E+08 |
| G1TRI7;Q5XTS1        | 0        | 0        | 0        | 1,03E+08 | 0        | 0        |
| G1TRK3;P82810        | 1,84E+09 | 6,1E+09  | 4,81E+09 | 4,64E+09 | 7,18E+09 | 5,14E+09 |
| G1TRL5;U3KLT5        | 3E+08    | 2,06E+09 | 2,28E+09 | 1,26E+08 | 3,14E+08 | 1,57E+08 |
| G1TRL8;G1T7B7        | 2,15E+09 | 1,82E+09 | 1,47E+09 | 3,12E+09 | 2,43E+09 | 2,06E+09 |
| G1TRM4;G1T455        | 4,15E+09 | 2,98E+10 | 2,99E+10 | 6,11E+09 | 5,55E+09 | 4,61E+09 |
| G1TRP3;G1TYB4;G1TMT0 | 1,48E+08 | 1,67E+08 | 1,95E+08 | 4,53E+08 | 5,38E+08 | 5,45E+08 |
| G1TRP6               | 0        | 0        | 0        | 0        | 0        | 3,87E+09 |
| G1TRR7               | 3,71E+08 | 0        | 0        | 2,64E+08 | 1,85E+08 | 2,63E+08 |
| G1TRS0               | 1,12E+09 | 6,46E+08 | 5,06E+08 | 1,06E+09 | 6,83E+08 | 4,36E+08 |
| G1TRS4               | 1,77E+10 | 7,76E+09 | 7,53E+09 | 2,79E+10 | 3,19E+10 | 4,6E+10  |
| G1TRT5               | 3,06E+09 | 2,73E+09 | 2,92E+09 | 6,61E+09 | 5,98E+09 | 5,93E+09 |
| G1TRV4               | 4,65E+08 | 1,48E+09 | 1,18E+09 | 3,95E+08 | 1,05E+09 | 9,75E+08 |
| G1TRV7;G1TAT9        | 7,24E+08 | 0        | 0        | 2,14E+08 | 2,4E+08  | 1,84E+08 |
| G1TRW0               | 1,01E+09 | 0        | 0        | 0        | 0        | 0        |
| G1TRY5               | 5,37E+08 | 1,63E+09 | 1,59E+09 | 9,58E+08 | 6,97E+08 | 1,19E+09 |
| G1TRZ2               | 7,5E+09  | 5E+09    | 4,28E+09 | 1,19E+10 | 1,16E+10 | 1,24E+10 |
| G1TS18               | 0        | 0        | 0        | 0        | 1,34E+08 | 0        |
| G1TS36               | 2,3E+09  | 1,9E+09  | 1,59E+09 | 2,83E+09 | 2,81E+09 | 4,39E+09 |
| G1TS38               | 14131000 | 0        | 0        | 0        | 0        | 0        |
| G1TS68               | 9,16E+08 | 7,96E+08 | 7,81E+08 | 4,32E+08 | 4,54E+08 | 5,47E+08 |
| G1TS78;G1SJ74        | 1,03E+09 | 3,35E+08 | 2,92E+08 | 7,91E+08 | 5,63E+08 | 4,43E+08 |
| G1TS90               | 4,17E+08 | 0        | 0        | 2,13E+09 | 1,18E+09 | 1,35E+09 |
| G1TS93               | 1,81E+08 | 1,2E+09  | 1,1E+09  | 2,28E+08 | 2,66E+08 | 3,52E+08 |
| G1TS97               | 3,29E+08 | 7,83E+08 | 1,28E+09 | 2,9E+08  | 4,2E+08  | 6,51E+08 |
| G1TSG1               | 2,24E+09 | 6,79E+09 | 5,79E+09 | 1,94E+09 | 2,31E+09 | 2,1E+09  |
| G1TSH8;G1U1V6;G1U324 | 79113000 | 4,74E+08 | 6,61E+08 | 0        | 1,11E+08 | 50757000 |
| G1TSI3               | 47144000 | 89489000 | 99034000 | 0        | 0        | 0        |
| G1TSK0               | 7,11E+08 | 2,1E+09  | 2E+09    | 1,39E+09 | 1,48E+09 | 1,87E+09 |
| G1TSK4               | 5,34E+08 | 1,29E+08 | 1,05E+08 | 2,58E+08 | 1,81E+08 | 1,75E+08 |
| G1TSL1               | 1,27E+10 | 2,2E+09  | 2,04E+09 | 2,89E+09 | 2,66E+09 | 2,93E+09 |
| G1TSL5               | 0        | 6,71E+08 | 6,17E+08 | 0        | 0        | 0        |
| G1TSM7               | 0        | 0        | 0        | 6,89E+08 | 5,71E+08 | 3,32E+08 |
| G1TSM9               | 0        | 0        | 0        | 0        | 0        | 96554000 |
| G1TSP3               | 6,02E+09 | 1,97E+09 | 1,78E+09 | 8,07E+09 | 5,81E+09 | 3,59E+09 |
| G1TST2               | 2,42E+08 | 2,9E+08  | 0        | 3,68E+09 | 2,02E+09 | 1,07E+09 |
| G1TST9;G1THA3        | 9,97E+08 | 1,65E+09 | 1,33E+09 | 2,53E+09 | 1,97E+09 | 1,41E+09 |
| U3KPD1;G1TSU1        | 1,56E+08 | 0        | 0        | 0        | 0        | 0        |
| G1TSX5;G1U675        | 0        | 0        | 0        | 0        | 0        | 2,8E+09  |
| G1TSZ1               | 0        | 6,59E+08 | 7,35E+08 | 3,33E+08 | 2,43E+08 | 2,55E+08 |

|                      |          |          |          |          |          |          |
|----------------------|----------|----------|----------|----------|----------|----------|
| G1TT06               | 1,29E+09 | 7,76E+09 | 7,35E+09 | 1,28E+10 | 1,47E+10 | 1,36E+10 |
| G1TT27;G1TZB5        | 8,87E+09 | 2,45E+10 | 2,09E+10 | 9,59E+09 | 8,32E+09 | 7,03E+09 |
| G1TT75               | 2,75E+10 | 9,26E+09 | 6,57E+09 | 5,45E+10 | 5,95E+10 | 6,33E+10 |
| G1TTA5               | 1,3E+09  | 7,03E+08 | 3,68E+08 | 3,97E+09 | 2,97E+09 | 2,21E+09 |
| G1TTB5;G1U8N8        | 5,37E+08 | 6,57E+08 | 3,6E+08  | 5,83E+08 | 8,17E+08 | 9,58E+08 |
| G1TTD4               | 4,88E+08 | 2,71E+09 | 3,01E+09 | 4,27E+08 | 7,23E+08 | 4,77E+08 |
| G1TTD6               | 7,3E+09  | 2,09E+10 | 2,21E+10 | 8,66E+09 | 6,22E+09 | 5,6E+09  |
| G1TTE3               | 2,53E+08 | 8,38E+08 | 7,62E+08 | 0        | 0        | 0        |
| G1TTI3               | 3,41E+08 | 8,26E+08 | 5,91E+08 | 6,3E+08  | 5,91E+08 | 1,12E+09 |
| G1TTJ1               | 2,16E+08 | 2,22E+09 | 2E+09    | 2,37E+08 | 1,62E+08 | 2,04E+08 |
| G1TTK6               | 5,27E+09 | 1,35E+09 | 1,09E+09 | 2,83E+09 | 2,31E+09 | 2,28E+09 |
| G1TTL1;G1TF42        | 8,52E+08 | 3,91E+09 | 4,43E+09 | 4,58E+08 | 1,55E+09 | 2,35E+09 |
| G1TTL7               | 1,48E+09 | 3,16E+08 | 2,46E+08 | 5,46E+08 | 5,63E+08 | 4,93E+08 |
| G1TTM0               | 0        | 0        | 3,35E+09 | 0        | 0        | 0        |
| G1TTM6               | 2,65E+09 | 6,97E+08 | 7,38E+08 | 1,25E+09 | 1,09E+09 | 6,95E+08 |
| G1TTN9               | 1,28E+08 | 6,16E+08 | 3,39E+08 | 1,72E+08 | 0        | 0        |
| G1TTP9               | 4,9E+08  | 2,56E+08 | 2,85E+08 | 6,54E+08 | 5,96E+08 | 8,6E+08  |
| G1TTQ5;G1TBH2;G1TYX8 | 2,73E+09 | 9,9E+09  | 8,83E+09 | 3,06E+09 | 4,33E+09 | 4,46E+09 |
| G1TTS1               | 6,62E+08 | 9,86E+08 | 7,51E+08 | 2,43E+09 | 2,05E+09 | 1,87E+09 |
| G1TTU6               | 1,68E+09 | 3,18E+09 | 3,69E+09 | 1,27E+09 | 2,67E+09 | 3,08E+09 |
| G1TTY7               | 3,96E+09 | 1,57E+10 | 1,5E+10  | 4,17E+09 | 3,72E+09 | 2,94E+09 |
| G1TU00               | 96607000 | 3,62E+08 | 5,93E+08 | 1,43E+08 | 1,07E+08 | 1,37E+08 |
| G1TU13;G1TS23        | 6,28E+09 | 2,42E+10 | 2,4E+10  | 1,03E+10 | 1,11E+10 | 1,23E+10 |
| G1TU32               | 7,26E+08 | 5,35E+08 | 3,92E+08 | 3,86E+08 | 5,95E+08 | 5,45E+08 |
| G1TU38               | 1,96E+08 | 0        | 0        | 0        | 1,11E+08 | 1,37E+08 |
| G1U7Y7;G1TU65;G1SQP5 | 6,89E+08 | 5,34E+09 | 6,83E+09 | 5,19E+08 | 1,42E+09 | 7,55E+08 |
| G1TU85               | 1,67E+08 | 83338000 | 86349000 | 0        | 98816000 | 0        |
| G1TUA3               | 6,81E+10 | 5,8E+10  | 5,72E+10 | 1,32E+10 | 1,41E+10 | 1,42E+10 |
| G1TUB1               | 0        | 3,2E+08  | 0        | 0        | 0        | 0        |
| G1TUB8               | 7,06E+09 | 1,69E+10 | 1,53E+10 | 5,77E+09 | 6,41E+09 | 3,73E+09 |
| G1TUC2               | 1,12E+09 | 1,48E+10 | 1,48E+10 | 1,58E+09 | 2,01E+09 | 2,47E+09 |
| G1TUC5               | 3,64E+08 | 0        | 0        | 1,63E+08 | 1,64E+08 | 1,6E+08  |
| G1TUC8               | 1,49E+10 | 1,04E+10 | 9,05E+09 | 6,59E+09 | 7,94E+09 | 7,58E+09 |
| G1TUD2               | 1,97E+09 | 5,73E+08 | 4,73E+08 | 4,64E+09 | 4,81E+09 | 4,61E+09 |
| G1TUD6               | 8,32E+09 | 1,44E+10 | 1,54E+10 | 5,41E+09 | 5,24E+09 | 6,55E+09 |
| G1TUE0               | 2,39E+10 | 1,22E+10 | 1,18E+10 | 8,74E+09 | 8,99E+09 | 1,11E+10 |
| G1TUF4               | 0        | 0        | 0        | 0        | 0        | 2,87E+08 |
| G1TUG7;G1SGI2        | 0        | 1,06E+08 | 1,43E+08 | 0        | 0        | 0        |
| G1TUH9;G1TVI6;G1TYJ3 | 7,19E+09 | 4,19E+10 | 4,42E+10 | 1,1E+10  | 1,34E+10 | 1,58E+10 |
| G1TUK1               | 0        | 4,43E+08 | 3,45E+08 | 1,51E+08 | 2,02E+08 | 2,03E+08 |
| G1TUK6               | 0        | 0        | 0        | 0        | 2,34E+08 | 0        |
| G1TUM2               | 9,77E+08 | 1,46E+09 | 1,57E+09 | 1,2E+09  | 9,63E+08 | 5,5E+08  |
| G1TUN6               | 1,49E+08 | 4,59E+08 | 6,7E+08  | 0        | 0        | 0        |
| G1TUP1               | 4,27E+08 | 1,02E+09 | 1,33E+09 | 7,63E+08 | 1,01E+09 | 7,95E+08 |
| G1TUP7;G1TTC8;G1TIW6 | 2,46E+09 | 2,35E+09 | 1,94E+09 | 1,81E+09 | 1,78E+09 | 1,61E+09 |
| G1TUT9;G1U2S9        | 3,57E+09 | 1,75E+10 | 1,76E+10 | 4,08E+09 | 3,11E+09 | 2,51E+09 |
| G1TUU8;Q7M370;G1U1J7 | 2,47E+09 | 5,48E+08 | 7,17E+08 | 4,26E+10 | 2,75E+10 | 2,61E+10 |
| G1TUX2               | 5,2E+10  | 1,4E+10  | 1,48E+10 | 3,8E+10  | 2,92E+10 | 2,91E+10 |
| G1TUY5               | 5,89E+09 | 1,35E+09 | 1,25E+09 | 1,36E+10 | 1,45E+10 | 1,71E+10 |
| G1TV19               | 1,47E+09 | 3,3E+09  | 2,72E+09 | 2,28E+09 | 3,52E+09 | 3,56E+09 |

|                      |          |          |          |          |          |          |
|----------------------|----------|----------|----------|----------|----------|----------|
| G1TV25               | 7,9E+08  | 3,18E+08 | 4,61E+08 | 4,55E+08 | 4,73E+08 | 5,36E+08 |
| G1TV31               | 3,39E+08 | 0        | 0        | 0        | 0        | 0        |
| G1TV43               | 3,96E+09 | 9,75E+09 | 8,68E+09 | 5,79E+09 | 5,26E+09 | 4,14E+09 |
| G1TV79               | 3,62E+10 | 1,38E+10 | 1,31E+10 | 4,18E+10 | 3,6E+10  | 3,72E+10 |
| G1TV91               | 99097000 | 1,63E+09 | 1,19E+09 | 7,8E+08  | 1,16E+09 | 1,77E+09 |
| G1TV92               | 3,02E+08 | 2,88E+09 | 3,66E+09 | 2,88E+08 | 1,27E+08 | 3,26E+08 |
| G1TVC8               | 1,84E+08 | 4,34E+08 | 2,65E+08 | 1,89E+08 | 0        | 0        |
| G1TVD5               | 0        | 1,86E+10 | 4,19E+09 | 0        | 0        | 0        |
| G1TVG7               | 1,36E+09 | 5E+08    | 6,15E+08 | 1,53E+09 | 1,24E+09 | 6,7E+08  |
| G1TVG8               | 2,85E+09 | 5,42E+08 | 5,02E+08 | 5,49E+09 | 7,81E+09 | 6,31E+09 |
| G1TVH0               | 3,03E+08 | 0        | 0        | 0        | 0        | 0        |
| G1TVH4               | 0        | 0        | 0        | 2,34E+08 | 4,12E+08 | 0        |
| G1TVH9               | 3,5E+09  | 1,54E+09 | 1,92E+09 | 4,33E+08 | 2,73E+08 | 3,21E+08 |
| G1TVK4;G1TW45;G1U1D0 | 3,79E+09 | 1,42E+09 | 1,12E+09 | 1,98E+09 | 1,65E+09 | 1,95E+09 |
| G1TVN1;G1SI90        | 1,63E+09 | 2,87E+08 | 2,5E+08  | 1,7E+08  | 1,33E+08 | 1,15E+08 |
| G1TVQ3;G1SVF4        | 7,55E+08 | 3,79E+09 | 4,18E+09 | 7,9E+08  | 1,16E+09 | 1,11E+09 |
| P20058;G1TVS4        | 0        | 0        | 0        | 2,72E+08 | 2,91E+08 | 3,92E+08 |
| G1TVS8               | 3,47E+09 | 1,04E+10 | 9,73E+09 | 4,61E+09 | 3,76E+09 | 2,84E+09 |
| G1TVT0               | 7,08E+10 | 7,58E+10 | 8,77E+10 | 5,85E+10 | 6,25E+10 | 8,01E+10 |
| G1TVT1;G1T7F5        | 4,97E+08 | 1E+09    | 1,26E+09 | 2,11E+09 | 1,6E+09  | 1,9E+09  |
| G1TVU3               | 0        | 0        | 0        | 8,69E+08 | 9,46E+08 | 1,35E+09 |
| G1TVU4               | 1,69E+10 | 8,97E+09 | 9,02E+09 | 1,35E+10 | 1,01E+10 | 1,98E+10 |
| G1TVW1               | 1,09E+10 | 3,07E+09 | 2,96E+09 | 6,59E+09 | 4,77E+09 | 5,3E+09  |
| U3KNK4;G1TVW5        | 0        | 1,36E+08 | 0        | 0        | 0        | 0        |
| G1TVX2               | 88449000 | 99023000 | 0        | 1,61E+08 | 87879000 | 0        |
| G1TVY5;G1T3X9;G1T5G1 | 7,48E+09 | 5,13E+09 | 5,06E+09 | 6,28E+09 | 6,98E+09 | 9,9E+09  |
| G1TVY8               | 0        | 5,9E+08  | 4,07E+08 | 0        | 0        | 0        |
| G1TW04               | 5,98E+08 | 0        | 0        | 0        | 0        | 0        |
| G1TW17               | 9,96E+08 | 1,67E+08 | 0        | 1,78E+08 | 1,76E+08 | 0        |
| G1TWC3               | 3,25E+09 | 6,34E+08 | 6,56E+08 | 2,87E+09 | 2,72E+09 | 3,44E+09 |
| G1TWC4               | 1,02E+08 | 0        | 0        | 0        | 0        | 0        |
| G1TWC5;G1T0L1        | 4,92E+08 | 1,17E+09 | 1,36E+09 | 1,24E+09 | 1,33E+09 | 1,8E+09  |
| G1TWH1;G1U730        | 1,98E+08 | 0        | 0        | 0        | 0        | 0        |
| G1TWI8               | 0        | 0        | 0        | 2,49E+08 | 2,12E+08 | 5,28E+08 |
| G1TWK1               | 8,19E+09 | 2,61E+09 | 2,8E+09  | 7,59E+09 | 5,97E+09 | 3,83E+09 |
| G1TWK7               | 6,21E+09 | 2,07E+09 | 2,46E+09 | 3,25E+09 | 3,24E+09 | 5,07E+09 |
| G1TWL0               | 2,56E+10 | 1,12E+10 | 9,55E+09 | 2,78E+10 | 2,92E+10 | 3,78E+10 |
| G1TWL2               | 2,91E+08 | 1,66E+08 | 0        | 3,52E+08 | 4,76E+08 | 6,01E+08 |
| G1TWP1               | 0        | 0        | 0        | 2,9E+08  | 4,55E+08 | 0        |
| G1TWP4               | 1,1E+09  | 1,47E+09 | 1,93E+09 | 3,48E+08 | 4,28E+08 | 5,56E+08 |
| G1TWQ3               | 3,75E+08 | 1,05E+09 | 5,79E+08 | 4,45E+08 | 3,08E+08 | 4,23E+08 |
| G1TWS0               | 6,38E+08 | 84891000 | 97193000 | 0        | 1,25E+08 | 80957000 |
| G1TWS6               | 7,44E+08 | 0        | 1,36E+08 | 2,96E+08 | 1,52E+08 | 96167000 |
| G1TWU1               | 3,27E+09 | 3,32E+08 | 3,94E+08 | 1,2E+09  | 1,04E+09 | 1,25E+09 |
| G1TWU8               | 1,23E+09 | 5,71E+08 | 5,95E+08 | 1,3E+09  | 7,28E+08 | 9,49E+08 |
| G1TWX9               | 4,66E+08 | 7,7E+08  | 8,2E+08  | 0        | 0        | 0        |
| G1TWY9               | 2,75E+09 | 5,46E+08 | 6,19E+08 | 5,67E+09 | 5,62E+09 | 6,41E+09 |
| G1TX03               | 1,29E+09 | 1,21E+09 | 1,31E+09 | 6,74E+08 | 8,79E+08 | 1,06E+09 |
| G1TX33;G1U4I5;G1TI26 | 5,26E+09 | 1,6E+10  | 1,58E+10 | 6,54E+09 | 6,3E+09  | 5,83E+09 |
| G1TX53               | 7,89E+09 | 3,62E+09 | 2,7E+09  | 8,56E+09 | 1,03E+10 | 1,58E+10 |

|                      |          |          |          |          |          |          |
|----------------------|----------|----------|----------|----------|----------|----------|
| G1TX70               | 8,56E+08 | 3,31E+09 | 2,86E+09 | 1,99E+09 | 1,15E+09 | 5,97E+08 |
| G1TX74               | 2,58E+08 | 9,09E+08 | 7,94E+08 | 0        | 0        | 0        |
| G1TX78               | 2,54E+09 | 5,62E+08 | 4,46E+08 | 8,02E+08 | 7,38E+08 | 6,89E+08 |
| G1TX94               | 2,38E+10 | 1,2E+10  | 9,65E+09 | 2,74E+10 | 2,31E+10 | 2,16E+10 |
| G1TXA2               | 0        | 2,88E+08 | 3,15E+08 | 0        | 0        | 0        |
| G1TXA3;G1TS81;G1SGR2 | 7,62E+08 | 2,06E+08 | 2,25E+08 | 3,45E+08 | 2,81E+08 | 0        |
| G1TXB6               | 1,26E+10 | 8,13E+10 | 7,96E+10 | 5,54E+09 | 6,18E+09 | 8,49E+09 |
| G1TXF6;G1U5T4;G1TM43 | 1,3E+10  | 1,99E+10 | 2,21E+10 | 8,39E+09 | 7,71E+09 | 7,09E+09 |
| G1TXF8               | 4,76E+08 | 2,4E+09  | 1,98E+09 | 5,78E+08 | 4,19E+08 | 4,95E+08 |
| G1TXG9               | 4,89E+09 | 1,9E+09  | 1,81E+09 | 1,06E+10 | 1,26E+10 | 1,65E+10 |
| G1TXK2               | 0        | 0        | 0        | 0        | 0        | 1,52E+09 |
| G1TXK3               | 0        | 1E+09    | 9,7E+08  | 1,26E+08 | 1,93E+08 | 2,07E+08 |
| G1TXN1               | 1,11E+09 | 1,33E+09 | 1,3E+09  | 2,57E+09 | 2,73E+09 | 3,03E+09 |
| G1TXQ6               | 4,25E+09 | 6,92E+09 | 5,56E+09 | 3,3E+09  | 3,02E+09 | 2,52E+09 |
| G1TXS5               | 1,19E+09 | 1,99E+08 | 2,91E+08 | 1,16E+09 | 6,43E+08 | 3,06E+08 |
| G1TXV6               | 92911000 | 1,8E+08  | 1,63E+08 | 0        | 1,58E+08 | 1,4E+08  |
| G1TXW1               | 0        | 1,98E+09 | 1,91E+09 | 0        | 0        | 0        |
| G1TXW6               | 6,92E+09 | 1E+09    | 1,55E+09 | 0        | 0        | 0        |
| G1U0Z8;G1TXYO        | 1,4E+09  | 0        | 0        | 2,79E+09 | 1,92E+09 | 2,86E+09 |
| G1TY06;P46409        | 3,73E+08 | 1,78E+09 | 1,43E+09 | 1,45E+09 | 3,7E+09  | 2,66E+09 |
| G1TYA7;P13490;U3KMM1 | 1,01E+10 | 2,85E+10 | 2,66E+10 | 2,39E+10 | 2,77E+10 | 1,92E+10 |
| G1TYE2               | 3,01E+08 | 9,52E+08 | 5,06E+08 | 1,8E+08  | 0        | 0        |
| G1TYH7               | 9,5E+09  | 2,83E+09 | 2,96E+09 | 1,04E+10 | 9,62E+09 | 9,33E+09 |
| G1TYK8;G1SCY1        | 1,03E+09 | 5,34E+08 | 6,06E+08 | 5,44E+08 | 4,82E+08 | 4,05E+08 |
| G1TYM6               | 1,68E+10 | 5,27E+09 | 5,93E+09 | 4,01E+09 | 5,03E+09 | 5,68E+09 |
| G1TYN0               | 8,27E+09 | 3,25E+09 | 2,04E+09 | 2,49E+10 | 1,85E+10 | 2,48E+10 |
| G1TYR3;G1SFQ6        | 5E+08    | 4,94E+08 | 3,94E+08 | 0        | 0        | 2,02E+08 |
| G1TYU5               | 0        | 1,85E+08 | 0        | 0        | 0        | 0        |
| G1TYV3               | 0        | 0        | 0        | 3,81E+08 | 2,89E+08 | 5,41E+08 |
| G1TYV6               | 3,89E+09 | 9,26E+08 | 9,66E+08 | 5,34E+09 | 3,66E+09 | 2,17E+09 |
| G1TYW1               | 1,37E+09 | 3,05E+09 | 3,44E+09 | 1,45E+09 | 2,05E+09 | 1,95E+09 |
| O77506;G1TY5;U3KNF1  | 1,93E+09 | 2,02E+10 | 2,14E+10 | 1,6E+09  | 3,02E+09 | 2,13E+09 |
| G1TZ09               | 0        | 1,72E+08 | 1,03E+08 | 0        | 0        | 0        |
| G1TZ19               | 2,29E+09 | 4,49E+08 | 5,12E+08 | 1,93E+09 | 1,92E+09 | 1,52E+09 |
| G1TZ23               | 1,33E+08 | 0        | 0        | 1,46E+08 | 1,98E+08 | 1,34E+08 |
| G1TZ26               | 5,1E+08  | 9,6E+08  | 1,36E+09 | 4,33E+08 | 5,58E+08 | 6,46E+08 |
| G1TZ31               | 4E+09    | 2,58E+09 | 2,19E+09 | 5,13E+09 | 4,47E+09 | 8,08E+09 |
| G1TZ40               | 6,22E+08 | 7,35E+08 | 6,08E+08 | 5,99E+09 | 6,26E+09 | 7,57E+09 |
| G1TZ63               | 4,14E+09 | 1,05E+09 | 9,91E+08 | 1,68E+09 | 1,16E+09 | 7,8E+08  |
| G1TZ76               | 8,81E+08 | 5,79E+09 | 5,94E+09 | 2,23E+09 | 1,82E+09 | 1,62E+09 |
| G1TZB9               | 2,73E+08 | 0        | 0        | 1,31E+08 | 1,34E+08 | 1,49E+08 |
| G1TZC9               | 9,26E+08 | 2,45E+08 | 3,27E+08 | 6,55E+08 | 5,08E+08 | 3,33E+08 |
| G1TZE2               | 3,2E+09  | 9,94E+08 | 9,41E+08 | 3,06E+09 | 2,31E+09 | 1,91E+09 |
| G1TZG4               | 0        | 0        | 0        | 4,32E+08 | 4,29E+08 | 4,22E+08 |
| G1TZI2               | 1,65E+09 | 4,19E+08 | 2,89E+08 | 1,05E+09 | 1,03E+09 | 4,84E+08 |
| G1TZJ6               | 2,42E+08 | 1,43E+08 | 1,36E+08 | 4,08E+08 | 9,39E+08 | 8,08E+08 |
| G1TZK6               | 8,08E+08 | 2,96E+08 | 2,91E+08 | 2,71E+08 | 2,29E+08 | 3,58E+08 |
| G1TZN2               | 2,75E+08 | 2,33E+08 | 3,58E+08 | 4,07E+08 | 8,16E+08 | 7,56E+08 |
| G1TZN7               | 5,29E+10 | 1,85E+10 | 1,59E+10 | 6,88E+10 | 8,26E+10 | 1,01E+11 |
| G1TZP0               | 1,4E+10  | 4,24E+10 | 4,69E+10 | 5,85E+09 | 1,02E+10 | 1,14E+10 |

|                      |          |          |          |          |          |          |
|----------------------|----------|----------|----------|----------|----------|----------|
| G1TZQ5               | 1,84E+08 | 1,99E+08 | 2,18E+08 | 0        | 0        | 0        |
| G1TZQ6               | 2,22E+10 | 5,77E+09 | 4,3E+09  | 1,74E+10 | 1,73E+10 | 1,55E+10 |
| G1TZU5               | 2,7E+09  | 1,18E+09 | 1,26E+09 | 3,29E+09 | 3,91E+09 | 5,42E+09 |
| G1TZV3;G1TSM0        | 2,91E+08 | 3,7E+08  | 1,6E+08  | 1,36E+08 | 1,67E+08 | 0        |
| G1TZY1               | 0        | 0        | 0        | 0        | 5,96E+08 | 1,48E+08 |
| G1TZZ3;G1TM28;G1SS07 | 7,09E+08 | 6,16E+09 | 6,67E+09 | 8,02E+08 | 7,7E+08  | 1,78E+09 |
| G1U000               | 2,9E+08  | 48284000 | 0        | 38364000 | 1,63E+08 | 1,37E+08 |
| G1U001;G1U4G2        | 5,19E+08 | 1,31E+10 | 1,45E+10 | 2,87E+09 | 3,87E+09 | 4,1E+09  |
| G1U013;U3KMS5        | 2,68E+08 | 8,35E+08 | 9,19E+08 | 8E+08    | 7,91E+08 | 5,7E+08  |
| G1U018               | 7,5E+09  | 2,4E+09  | 2,78E+09 | 7,63E+09 | 6,7E+09  | 7E+09    |
| G1U058               | 2,06E+08 | 0        | 0        | 0        | 0        | 0        |
| G1U070               | 6E+09    | 1,17E+09 | 1,27E+09 | 9,01E+09 | 6,19E+09 | 4,3E+09  |
| G1U072;G1TTQ6;G1U6Q9 | 1,63E+09 | 2,25E+09 | 2,54E+09 | 4,51E+09 | 4,12E+09 | 5,5E+09  |
| G1U074               | 0        | 0        | 0        | 38576000 | 0        | 0        |
| G1U095               | 0        | 0        | 0        | 2,77E+08 | 0        | 0        |
| G1U0A4;U3KML1;O46377 | 1,34E+09 | 5,06E+08 | 6,28E+08 | 1,41E+09 | 6,37E+08 | 7,5E+08  |
| G1U0B1               | 0        | 0        | 0        | 3,07E+08 | 0        | 0        |
| G1U0B3               | 6,79E+09 | 2,2E+09  | 1,9E+09  | 5,53E+09 | 3,95E+09 | 2,79E+09 |
| G1U0B4;P00008;G1TKY2 | 2,89E+10 | 1,43E+10 | 1,23E+10 | 4,54E+10 | 4,41E+10 | 6,74E+10 |
| G1U0B5;G1TZ50        | 2,09E+08 | 1,98E+09 | 7,69E+08 | 2,47E+08 | 96742000 | 1,2E+08  |
| G1U0I7               | 6,57E+08 | 1,63E+09 | 1,78E+09 | 3,58E+08 | 3,19E+08 | 3,92E+08 |
| G1U0J6               | 99157000 | 0        | 0        | 0        | 0        | 84090000 |
| G1U0N2               | 4,66E+08 | 3,7E+08  | 2,83E+08 | 1,18E+09 | 9,27E+08 | 1,15E+09 |
| G1U0Q0               | 0        | 1,41E+08 | 1,02E+08 | 4,32E+08 | 3,1E+08  | 6,54E+08 |
| G1U0Q2               | 2,5E+09  | 9,7E+09  | 7,14E+09 | 2,37E+09 | 3,22E+09 | 4,3E+09  |
| G1U0Q7               | 2,97E+09 | 1,12E+10 | 1,17E+10 | 1,98E+09 | 2,29E+09 | 2,36E+09 |
| G1U0R8               | 0        | 2,78E+08 | 0        | 0        | 0        | 0        |
| G1U0S4               | 7,71E+08 | 1,33E+08 | 0        | 1,32E+08 | 0        | 1,51E+08 |
| G1U0T4               | 0        | 0        | 0        | 0        | 0        | 1,68E+08 |
| G1U0U5               | 1,02E+08 | 1,5E+08  | 1,63E+08 | 0        | 0        | 0        |
| G1U0V9               | 1,79E+08 | 2,22E+08 | 0        | 2,47E+08 | 3,06E+08 | 5,14E+08 |
| G1U0W2               | 3,75E+08 | 6E+08    | 4,94E+08 | 4,03E+08 | 5,11E+08 | 4,64E+08 |
| G1U0Y0               | 0        | 0        | 87250000 | 0        | 0        | 0        |
| G1U0Y6               | 5,56E+09 | 1,22E+09 | 1E+09    | 4,31E+09 | 3,72E+09 | 3,71E+09 |
| G1U0Z7               | 8,11E+08 | 4,03E+08 | 5,34E+08 | 1,6E+09  | 1,18E+09 | 1,29E+09 |
| G1U104               | 7,84E+08 | 3,53E+08 | 0        | 6,09E+08 | 4,32E+08 | 3,66E+08 |
| G1U105               | 3,15E+08 | 0        | 0        | 2,42E+08 | 0        | 0        |
| G1U115               | 3,44E+09 | 3,47E+09 | 3,81E+09 | 1,34E+09 | 1,15E+09 | 6,35E+08 |
| G1U120               | 73911000 | 0        | 0        | 0        | 0        | 0        |
| G1U150               | 6,14E+09 | 9,35E+08 | 8,38E+08 | 3,1E+09  | 3,32E+09 | 3,31E+09 |
| G1U153               | 2,72E+09 | 1,88E+09 | 2,56E+09 | 3,97E+09 | 3,82E+09 | 3,81E+09 |
| G1U194               | 4,51E+08 | 6,87E+08 | 8,14E+08 | 1,5E+09  | 1,34E+09 | 1,63E+09 |
| G1U198               | 0        | 1,4E+09  | 1,46E+09 | 1,57E+08 | 2,16E+08 | 2,57E+08 |
| G1U1C0               | 2,38E+09 | 7,69E+09 | 9,03E+09 | 3,4E+09  | 4,94E+09 | 5,65E+09 |
| G1U1E5               | 0        | 2,23E+08 | 1,84E+08 | 0        | 0        | 0        |
| G1U7W7;Q9N121;G1U1E6 | 2,07E+09 | 6,09E+08 | 8,06E+08 | 1,67E+09 | 2,39E+09 | 3,38E+09 |
| G1U1H2               | 1,96E+08 | 4,36E+08 | 5,77E+08 | 2,42E+08 | 3,3E+08  | 5,71E+08 |
| G1U1H3               | 1,8E+08  | 0        | 0        | 2,58E+08 | 2,35E+08 | 2,14E+08 |
| G1U1M3               | 1,48E+09 | 7,02E+09 | 6,63E+09 | 2,08E+09 | 2,63E+09 | 2,6E+09  |
| G1U1P4;P10829        | 0        | 0        | 0        | 0        | 42945000 | 0        |

|                            |          |          |          |          |          |          |
|----------------------------|----------|----------|----------|----------|----------|----------|
| G1U1Q1                     | 0        | 0        | 0        | 6,28E+08 | 3,29E+08 | 3,78E+08 |
| G1U1Q8                     | 2,07E+09 | 1,46E+10 | 1,27E+10 | 9,65E+09 | 1,52E+10 | 1,47E+10 |
| G1U1W8                     | 1,39E+09 | 2,15E+09 | 2,09E+09 | 3,08E+08 | 0        | 3,4E+08  |
| G1U1X1                     | 19935000 | 77695000 | 95291000 | 11342000 | 9974600  | 0        |
| G1U1X6                     | 8,59E+08 | 3,46E+08 | 4,6E+08  | 6,56E+08 | 9,43E+08 | 9,9E+08  |
| G1U1X8;G1TFU8;G1SEE3       | 2,54E+09 | 8,84E+08 | 8,27E+08 | 1,05E+09 | 8,94E+08 | 9,7E+08  |
| G1U211                     | 0        | 0        | 0        | 4,61E+08 | 2,98E+08 | 2,58E+08 |
| G1U266                     | 3,39E+08 | 0        | 0        | 1,81E+08 | 0        | 0        |
| G1U276;G1U1I2              | 1,83E+10 | 5,25E+09 | 5,34E+09 | 1,52E+10 | 1,52E+10 | 1,4E+10  |
| G1U2B5                     | 0        | 1,18E+09 | 1,13E+09 | 7,85E+08 | 1,06E+09 | 9,7E+08  |
| G1U2E3;G1SRU4              | 6,81E+08 | 2,77E+09 | 3,19E+09 | 8,5E+08  | 1,08E+09 | 1,14E+09 |
| G1U2E5                     | 2,35E+08 | 5,41E+08 | 7,74E+08 | 3,14E+08 | 0        | 0        |
| G1U2E6                     | 3,22E+10 | 3,95E+09 | 4,14E+09 | 2,06E+10 | 1,56E+10 | 1,4E+10  |
| G1U2E8;G1TOH4              | 7,41E+08 | 0        | 0        | 3,79E+08 | 3,54E+08 | 0        |
| G1U2N6                     | 2,15E+09 | 3,18E+08 | 3,36E+08 | 1,18E+09 | 1,3E+09  | 9,06E+08 |
| G1U2N9;G1SGX6              | 87707000 | 0        | 0        | 1,68E+08 | 1,25E+08 | 1,03E+08 |
| P14282;G1U2Q7              | 1,76E+09 | 1,68E+08 | 1,81E+08 | 2,82E+09 | 1,44E+09 | 2,27E+09 |
| G1U2R0                     | 0        | 0        | 0        | 0        | 1,01E+08 | 0        |
| G1U2R1                     | 5,15E+09 | 1,54E+09 | 1,48E+09 | 6,17E+09 | 4,99E+09 | 2,93E+09 |
| G1U2R2                     | 1,98E+09 | 4,97E+09 | 5,97E+09 | 2,71E+09 | 2,05E+09 | 1,51E+09 |
| G1U2S7;G1TGJ7              | 1,82E+08 | 0        | 0        | 0        | 0        | 0        |
| G1U7U5;G1U2T2              | 6,69E+08 | 2,3E+08  | 3,26E+08 | 6,07E+08 | 7,33E+08 | 6,68E+08 |
| G1U2V6                     | 3,09E+09 | 8,55E+09 | 1,08E+10 | 2,38E+09 | 1,92E+09 | 2,65E+09 |
| G1U2W0                     | 1,16E+09 | 3,81E+08 | 4,06E+08 | 1,64E+09 | 1,83E+09 | 1,75E+09 |
| G1U2X9                     | 2,58E+09 | 7,13E+09 | 8,16E+09 | 1,46E+09 | 1,87E+09 | 1,4E+09  |
| G1U2Z9                     | 0        | 0        | 0        | 0        | 0        | 1,41E+08 |
| G1U304                     | 1,51E+08 | 0        | 1,92E+08 | 2,61E+08 | 2,81E+08 | 2,32E+08 |
| G1U305                     | 3,15E+08 | 3,53E+08 | 3,33E+08 | 2,96E+09 | 2,73E+09 | 2,9E+09  |
| G1U315                     | 0        | 7,38E+08 | 5,51E+08 | 2,11E+08 | 3,7E+08  | 2,01E+08 |
| G1U328                     | 1,53E+08 | 3,77E+08 | 5,86E+08 | 1,87E+08 | 2,11E+08 | 0        |
| G1U344;G1T040;G1TLI2       | 1,31E+09 | 9,92E+09 | 9,33E+09 | 1,86E+09 | 2,47E+09 | 2,11E+09 |
| G1U354                     | 1,25E+09 | 1,3E+09  | 1,45E+09 | 7,28E+08 | 5,11E+08 | 4,29E+08 |
| Q28651-2;Q28651-4;Q28651-3 | 0        | 90100000 | 1,02E+08 | 0        | 0        | 0        |
| G1U383                     | 39746000 | 0        | 1,23E+08 | 54321000 | 0        | 0        |
| G1U3B2                     | 0        | 5,44E+08 | 9,86E+08 | 4,69E+08 | 2,68E+08 | 3,67E+08 |
| G1U3B8                     | 2,65E+09 | 7,37E+09 | 9,13E+09 | 1,83E+09 | 2,85E+09 | 3,06E+09 |
| G1U3C5                     | 3,89E+08 | 1,61E+08 | 2,82E+08 | 2,01E+09 | 1,37E+09 | 1,17E+09 |
| G1U3G6                     | 9,19E+09 | 2,52E+09 | 2,45E+09 | 3,19E+09 | 2,88E+09 | 2,3E+09  |
| G1U3G8                     | 6,47E+08 | 0        | 0        | 0        | 0        | 0        |
| G1U3I5                     | 1,66E+10 | 5,73E+09 | 5,89E+09 | 1E+10    | 1,11E+10 | 1,3E+10  |
| G1U3M5                     | 2,69E+09 | 9,27E+09 | 1,06E+10 | 5,65E+09 | 5,6E+09  | 5,49E+09 |
| G1U3P6                     | 1,16E+09 | 5,98E+08 | 4,68E+08 | 1,28E+09 | 1,16E+09 | 1,03E+09 |
| G1U3Q0;G1T8W7              | 2,02E+09 | 6,15E+08 | 5,26E+08 | 2E+09    | 1,82E+09 | 9,97E+08 |
| G1U3Q5                     | 0        | 5,2E+08  | 7,74E+08 | 0        | 0        | 0        |
| G1U3Q6                     | 4,18E+08 | 0        | 0        | 7,38E+08 | 4,69E+08 | 3,15E+08 |
| G1U3S3                     | 1,65E+08 | 1,49E+08 | 0        | 0        | 0        | 0        |
| G1U3S6                     | 8,52E+08 | 2,79E+08 | 3,01E+08 | 1,73E+09 | 1,22E+09 | 7,39E+08 |
| G1U3T2                     | 0        | 5,19E+08 | 5,27E+08 | 0        | 0        | 0        |
| G1U3V0;G1SR26              | 4,38E+09 | 1,68E+09 | 1,82E+09 | 9,29E+09 | 9,47E+09 | 1,26E+10 |
| G1U3X5                     | 3,65E+08 | 2,13E+09 | 5,86E+09 | 1,38E+08 | 0        | 1,33E+08 |

|                      |          |          |          |          |          |          |
|----------------------|----------|----------|----------|----------|----------|----------|
| G1U410               | 1,07E+10 | 5,87E+10 | 6,24E+10 | 1,33E+10 | 1,43E+10 | 1,87E+10 |
| G1U411;G1TIB3        | 1,2E+09  | 7,02E+09 | 7,74E+09 | 2,24E+09 | 3,04E+09 | 3,03E+09 |
| G1U430               | 8,23E+08 | 5,57E+08 | 4,13E+08 | 9,51E+08 | 1,43E+09 | 1,92E+09 |
| G1U442               | 2,31E+08 | 0        | 0        | 2,36E+08 | 2,37E+08 | 2,32E+08 |
| G1U446               | 4,92E+08 | 1,67E+09 | 1,03E+09 | 2,1E+09  | 2,05E+09 | 2,73E+09 |
| G1U448               | 2,05E+09 | 9,04E+09 | 1,01E+10 | 6,87E+09 | 1,1E+10  | 1,08E+10 |
| G1U453;G1SVD7        | 4,42E+08 | 1,59E+08 | 1,93E+08 | 2,03E+09 | 2,77E+09 | 2,67E+09 |
| G1U460               | 9,41E+09 | 3,8E+09  | 3,07E+09 | 1,02E+10 | 8,93E+09 | 9,8E+09  |
| G1U463               | 8,96E+08 | 0        | 0        | 2,98E+08 | 3,62E+08 | 3,93E+08 |
| G1U469;P35748        | 0        | 3,68E+08 | 5,5E+08  | 0        | 0        | 0        |
| G1U482               | 0        | 0        | 0        | 0        | 0        | 5,6E+08  |
| G1U487               | 3,9E+08  | 0        | 0        | 0        | 0        | 0        |
| G1U4C2               | 3,53E+08 | 0        | 0        | 0        | 0        | 0        |
| G1U4E6               | 6,26E+09 | 7,75E+09 | 8,95E+09 | 1,97E+09 | 2,16E+09 | 2,29E+09 |
| G1U4G9;Q95MF9        | 2,98E+09 | 1,82E+10 | 2,12E+10 | 5,38E+08 | 7,61E+08 | 8,5E+08  |
| G1U4H9               | 1,37E+08 | 2,38E+08 | 5,25E+08 | 0        | 0        | 0        |
| G1U4I9;G1TID7        | 3,8E+08  | 2,64E+08 | 0        | 6,54E+08 | 7,39E+08 | 9,05E+08 |
| G1U4K3               | 0        | 0        | 0        | 0        | 57857000 | 0        |
| G1U4L1               | 0        | 0        | 4,44E+08 | 0        | 0        | 0        |
| G1U4L6               | 2,22E+08 | 0        | 0        | 0        | 0        | 0        |
| G1U4P7               | 9,29E+09 | 2,99E+09 | 3,04E+09 | 6,6E+09  | 1,04E+10 | 1,02E+10 |
| G1U4R5               | 2,4E+10  | 6,54E+09 | 6,94E+09 | 3,01E+10 | 2,24E+10 | 1,6E+10  |
| G1U4U7;G1SJR6        | 0        | 0        | 0        | 0        | 0        | 3,51E+08 |
| G1U4V1               | 3,38E+08 | 1,98E+08 | 2,81E+08 | 3,94E+08 | 1,42E+08 | 2,04E+08 |
| G1U8R4;G1U4Y5        | 1,5E+08  | 0        | 0        | 0        | 0        | 1,9E+08  |
| G1U516               | 0        | 0        | 0        | 0        | 0        | 43924000 |
| G1U522               | 1,05E+09 | 5,68E+09 | 5,56E+09 | 3,83E+09 | 4,29E+09 | 5,91E+09 |
| G1U535               | 7,45E+08 | 0        | 0        | 1,37E+09 | 1,06E+09 | 1,09E+09 |
| G1U537               | 0        | 0        | 0        | 2E+08    | 1,94E+08 | 1,72E+08 |
| G1U540               | 1,02E+09 | 1,84E+08 | 2,37E+08 | 3,45E+08 | 6,63E+08 | 8,79E+08 |
| U3KMU0;G1U541        | 0        | 0        | 6,73E+08 | 0        | 0        | 0        |
| G1U571               | 0        | 2,11E+08 | 0        | 0        | 0        | 0        |
| G1U577               | 0        | 24462000 | 0        | 0        | 0        | 0        |
| G1U5B3               | 1,71E+10 | 1,39E+10 | 1,26E+10 | 9,73E+09 | 1,1E+10  | 1,32E+10 |
| G1U5D4               | 3,74E+08 | 0        | 0        | 0        | 0        | 0        |
| G1U5F4               | 0        | 0        | 0        | 0        | 0        | 9,54E+08 |
| G1U5L3               | 6,06E+09 | 2,79E+09 | 2,09E+09 | 1,58E+10 | 1,44E+10 | 1,38E+10 |
| G1U5M3               | 1,59E+08 | 0        | 0        | 0        | 0        | 0        |
| G1U5M7               | 3,65E+09 | 1,73E+09 | 1,36E+09 | 1,65E+09 | 1,79E+09 | 1,79E+09 |
| G1U5N7;G1TJ15;G1TK25 | 6,98E+09 | 9,69E+08 | 1,18E+09 | 2,63E+09 | 3,23E+09 | 3,13E+09 |
| G1U5P9               | 6,74E+08 | 2,2E+08  | 1,85E+08 | 2,04E+08 | 2,5E+08  | 3,5E+08  |
| G1U5Q7               | 1,09E+09 | 8,5E+08  | 1,02E+09 | 5,86E+08 | 5,58E+08 | 5,17E+08 |
| G1U5U0               | 3,29E+09 | 5,66E+08 | 4,92E+08 | 6E+08    | 5,71E+08 | 6,2E+08  |
| G1U5W5               | 0        | 4,15E+08 | 5,65E+08 | 0        | 0        | 0        |
| G1U5X6               | 5,87E+09 | 2,11E+09 | 1,92E+09 | 5,83E+09 | 7,93E+09 | 9,69E+09 |
| G1U5Z2               | 1,98E+08 | 0        | 84912000 | 4,04E+08 | 2,46E+08 | 3,95E+08 |
| G1U5Z3               | 1,24E+08 | 0        | 0        | 0        | 0        | 0        |
| G1U603;G1T966        | 1,6E+08  | 7,63E+08 | 8,62E+08 | 0        | 1,32E+08 | 1,07E+08 |
| G1U636               | 3,06E+09 | 1,01E+10 | 1,14E+10 | 2,25E+09 | 1,53E+09 | 2,39E+09 |
| G1U643               | 0        | 2,94E+08 | 2,76E+08 | 0        | 0        | 0        |



|                        |          |          |          |          |          |          |
|------------------------|----------|----------|----------|----------|----------|----------|
| G1U644                 | 71752000 | 0        | 0        | 0        | 0        | 0        |
| G1U670                 | 3,8E+08  | 1,01E+09 | 1,11E+09 | 5,01E+08 | 4,26E+08 | 6,02E+08 |
| G1U684                 | 7,9E+09  | 2,56E+09 | 2,71E+09 | 3,9E+10  | 4,93E+10 | 5,51E+10 |
| G1U6A6                 | 98729000 | 4,25E+08 | 4,88E+08 | 0        | 0        | 0        |
| G1U6B2                 | 1,09E+09 | 9,54E+09 | 9,89E+09 | 2,07E+09 | 2,7E+09  | 2,56E+09 |
| G1U6B4                 | 9,18E+09 | 2,64E+09 | 2,27E+09 | 9,08E+09 | 1,28E+10 | 9,15E+09 |
| G1U6C7                 | 0        | 0        | 0        | 0        | 0        | 56599000 |
| G1U6F4;G1TSU5;G1U2F1   | 3,64E+08 | 7,83E+08 | 7,34E+08 | 9,53E+08 | 9,47E+08 | 1,06E+09 |
| G1U6G2                 | 1,35E+09 | 1,88E+09 | 1,96E+09 | 7,95E+08 | 7,35E+08 | 7,46E+08 |
| G1U6H0;G1SRB3          | 5,8E+10  | 1,03E+10 | 9,8E+09  | 6,05E+10 | 7,25E+10 | 9,23E+10 |
| G1U6H4                 | 3,22E+08 | 4,85E+08 | 5,67E+08 | 1,17E+09 | 2,27E+09 | 1,71E+09 |
| G1U6J6                 | 0        | 0        | 0        | 1,67E+08 | 2,04E+08 | 2,39E+08 |
| G1U6N2                 | 8,25E+08 | 3,53E+09 | 4,6E+09  | 2,13E+09 | 2,07E+09 | 2,39E+09 |
| G1U6N8                 | 1,83E+10 | 4,37E+09 | 4,91E+09 | 1,85E+10 | 1,75E+10 | 1,87E+10 |
| G1U6R0                 | 9,77E+08 | 2,46E+08 | 2,56E+08 | 9,56E+08 | 8,54E+08 | 7,2E+08  |
| G1U6T5                 | 1,41E+09 | 1,13E+09 | 1,1E+09  | 4,1E+08  | 7,96E+08 | 4,55E+08 |
| G1U6W9                 | 0        | 0        | 0        | 2,94E+08 | 3,4E+08  | 0        |
| G1U6X4                 | 2,76E+08 | 3,56E+08 | 7,23E+08 | 2,02E+08 | 2,07E+08 | 2,59E+08 |
| G1U6X6                 | 3,29E+09 | 2,95E+09 | 3,17E+09 | 3,98E+09 | 5,28E+09 | 7,66E+09 |
| G1U723;G1SPR2;P80508   | 4,56E+08 | 1,28E+09 | 1,06E+09 | 2,65E+09 | 4,51E+09 | 2,48E+09 |
| G1U724                 | 3,92E+08 | 2,26E+09 | 2,44E+09 | 4,41E+08 | 6,79E+08 | 6,16E+08 |
| G1U797                 | 7,5E+08  | 2,67E+09 | 2,27E+09 | 1,12E+09 | 1,3E+09  | 1,31E+09 |
| G1U7A6                 | 3,55E+08 | 0        | 0        | 0        | 0        | 0        |
| G1U7C5;G1TQS9          | 9,65E+09 | 2,15E+10 | 2,05E+10 | 1,15E+11 | 1,20E+11 | 1,08E+11 |
| G1U7C6                 | 3,08E+09 | 4,43E+09 | 4,79E+09 | 3,42E+09 | 2,94E+09 | 3,38E+09 |
| G1U7G6                 | 3,86E+10 | 1,16E+10 | 1,2E+10  | 2,81E+10 | 2,79E+10 | 2,83E+10 |
| G1U7I9;G1U968          | 5,55E+09 | 8,97E+09 | 9,31E+09 | 5,84E+09 | 8,09E+09 | 6,5E+09  |
| G1U7J2                 | 0        | 0        | 0        | 1,68E+08 | 2,51E+08 | 0        |
| G1U7K4                 | 1,04E+10 | 5,16E+10 | 5,42E+10 | 4,8E+09  | 8,84E+09 | 6,81E+09 |
| G1U7K9;G1SL50          | 6,17E+09 | 3,28E+10 | 3,49E+10 | 6,41E+09 | 1,43E+10 | 1,41E+10 |
| G1U7L1;G1TL08          | 5,42E+09 | 2,38E+10 | 2,37E+10 | 6,22E+09 | 6,21E+09 | 4,88E+09 |
| G1U7L4                 | 5,77E+11 | 2,24E+11 | 2,21E+11 | 4,15E+11 | 4,79E+11 | 6,15E+11 |
| G1U7M4                 | 9,78E+08 | 1,07E+10 | 9,05E+09 | 2,1E+09  | 2,69E+09 | 2,91E+09 |
| G1U871;G1U7P6          | 0        | 3,35E+08 | 6E+08    | 1,74E+08 | 0        | 0        |
| G1U7Q6                 | 5,19E+08 | 1,16E+09 | 1,44E+09 | 6,45E+08 | 5,92E+08 | 6,49E+08 |
| G1U7S8                 | 1,51E+09 | 1,68E+09 | 1,89E+09 | 8,61E+08 | 8,88E+08 | 8,85E+08 |
| G1U7U3                 | 3,01E+08 | 1,38E+09 | 2,05E+09 | 7,24E+08 | 4,84E+08 | 7,86E+08 |
| G1U7V8                 | 6,73E+09 | 4,76E+10 | 4,99E+10 | 7,02E+09 | 9,09E+09 | 9,93E+09 |
| G1U7X2                 | 8,64E+08 | 2,9E+09  | 3,86E+09 | 3,63E+09 | 5,23E+09 | 5,84E+09 |
| G1U7Y3                 | 0        | 0        | 0        | 1,33E+08 | 1,59E+08 | 1,47E+08 |
| G1U800                 | 0        | 0        | 0        | 0        | 1,46E+08 | 3,63E+08 |
| G1U826;G1U1Y9          | 2,26E+09 | 2,29E+09 | 1,96E+09 | 2,5E+09  | 4,06E+09 | 3,13E+09 |
| G1U840                 | 0        | 1,5E+08  | 1,13E+08 | 0        | 0        | 0        |
| P00949;G1U866;P00949-2 | 2,34E+08 | 8,2E+08  | 8,53E+08 | 7,53E+08 | 4,95E+08 | 5,26E+08 |
| G1U886                 | 0        | 0        | 1,39E+08 | 0        | 0        | 0        |
| G1U891                 | 1,92E+09 | 2,84E+08 | 3,04E+08 | 5,44E+08 | 5,78E+08 | 1E+09    |
| G1U895                 | 0        | 0        | 0        | 0        | 0        | 2,2E+08  |
| G1U8B3                 | 1,74E+09 | 6,7E+09  | 7,65E+09 | 1,72E+09 | 2,3E+09  | 2,64E+09 |
| G1U8C4                 | 5,03E+08 | 2,39E+09 | 1,8E+09  | 5,16E+08 | 4,31E+08 | 4,78E+08 |
| G1U8F0                 | 2,76E+09 | 2,47E+09 | 2,77E+09 | 1,42E+09 | 1,03E+09 | 7,54E+08 |

|                      |          |          |          |          |          |          |
|----------------------|----------|----------|----------|----------|----------|----------|
| U3KM44;G1U8G5        | 0        | 1,26E+08 | 0        | 0        | 0        | 0        |
| G1U8G9               | 3,12E+08 | 4,21E+08 | 3,98E+08 | 7,08E+08 | 4,81E+08 | 9,03E+08 |
| G1U8I5;P27123        | 3,83E+08 | 4,09E+09 | 4,41E+09 | 5,86E+08 | 1,12E+09 | 1,07E+09 |
| G1U8J5               | 3,97E+10 | 4,11E+09 | 4,4E+09  | 1,56E+10 | 1,93E+10 | 2,6E+10  |
| G1U8K3               | 1,86E+09 | 2,81E+08 | 3,46E+08 | 1,34E+08 | 0        | 0        |
| G1U8M6               | 4,52E+08 | 5,92E+08 | 7,19E+08 | 2,15E+09 | 7,76E+08 | 4,89E+08 |
| G1U8N0               | 1,17E+08 | 0        | 0        | 0        | 0        | 0        |
| G1U8P2               | 7,91E+08 | 3,65E+09 | 4,33E+09 | 1,33E+09 | 1,96E+09 | 1,8E+09  |
| G1U8Q6;G1SP12        | 0        | 0        | 0        | 1,12E+09 | 1,07E+09 | 1,08E+09 |
| G1U8R2               | 1,89E+09 | 3,02E+09 | 3,14E+09 | 8,31E+08 | 1,83E+09 | 1,36E+09 |
| P35324;G1U8R3;G1TRN5 | 1,61E+08 | 8,9E+08  | 6,67E+08 | 47477000 | 0        | 0        |
| G1U8S6               | 0        | 0        | 0        | 2,44E+08 | 0        | 0        |
| G1U8T9;G1TOR2;G1SMP4 | 3,67E+08 | 1,85E+09 | 1,65E+09 | 7,84E+08 | 2,99E+08 | 4,56E+08 |
| G1U8V2               | 3,39E+09 | 8,27E+08 | 8,83E+08 | 7,88E+09 | 8,79E+09 | 1,09E+10 |
| G1U8W6;G1SNS5;U3KN82 | 7,84E+09 | 2,65E+10 | 2,65E+10 | 4,16E+09 | 4,05E+09 | 4,48E+09 |
| G1U8Y1               | 2,84E+09 | 1,18E+09 | 1,44E+09 | 1,29E+09 | 1,17E+09 | 7,83E+08 |
| G1U913               | 3,61E+08 | 0        | 1,57E+08 | 1,04E+08 | 0        | 0        |
| G1U945;U3KPP1;G1TKS8 | 2,38E+09 | 1,05E+10 | 8,15E+09 | 2,35E+09 | 2,55E+09 | 1,89E+09 |
| G1U949               | 1,11E+09 | 9,23E+09 | 9,6E+09  | 2,09E+09 | 3,49E+09 | 2,63E+09 |
| G1U971               | 1,78E+09 | 6,58E+09 | 7,73E+09 | 5,51E+08 | 6,69E+08 | 6,47E+08 |
| G1U974               | 3,14E+09 | 1,54E+10 | 1,57E+10 | 8,44E+09 | 1,16E+10 | 1,08E+10 |
| G1U998               | 1,99E+08 | 0        | 0        | 0        | 0        | 0        |
| G1U9B4               | 3,94E+09 | 2,24E+09 | 2,04E+09 | 2,88E+09 | 3,51E+09 | 3,35E+09 |
| G1U9C1;G1T953        | 84942000 | 3,11E+08 | 3,81E+08 | 0        | 74494000 | 0        |
| G1U9D3               | 0        | 6,42E+08 | 6,99E+08 | 0        | 0        | 3,52E+08 |
| G1U9G5               | 0        | 0        | 0        | 0        | 0        | 2,71E+09 |
| G1U9J9               | 0        | 2,69E+08 | 1,51E+08 | 0        | 0        | 0        |
| G1U9L6               | 1,69E+08 | 0        | 0        | 3,28E+08 | 4,62E+08 | 3,51E+08 |
| G1U9Q1               | 9,54E+08 | 1,06E+09 | 9,13E+08 | 9,15E+08 | 1,24E+09 | 1,71E+09 |
| G1U9R0               | 2,9E+10  | 2,07E+11 | 1,99E+11 | 3,3E+10  | 4,29E+10 | 4,11E+10 |
| G1U9R6;Q28749        | 9,86E+09 | 3,48E+09 | 3,02E+09 | 3,68E+10 | 2,51E+10 | 2,04E+10 |
| G1U9R7               | 5,2E+09  | 6,91E+08 | 4,32E+08 | 4,53E+09 | 3,21E+09 | 3,7E+09  |
| G1U9R8               | 6,51E+09 | 1,83E+10 | 1,71E+10 | 9,1E+09  | 1,29E+10 | 1,09E+10 |
| G1U9S2;P49065        | 2,57E+08 | 2,6E+08  | 3,05E+08 | 1,57E+09 | 3,26E+09 | 1,24E+09 |
| G1U9S7               | 1,08E+10 | 3,79E+10 | 3,92E+10 | 6,48E+09 | 5,91E+09 | 5,64E+09 |
| G1U9T1               | 7,51E+09 | 1,97E+10 | 2,18E+10 | 4,11E+09 | 3,68E+09 | 3,94E+09 |
| G1U9T2;G1TRZ8;G1SR75 | 5,34E+08 | 9,5E+08  | 9,27E+08 | 3,27E+08 | 3,82E+08 | 4,18E+08 |
| G1U9T4               | 1,17E+10 | 3,85E+10 | 3,62E+10 | 1,13E+10 | 1,4E+10  | 1,12E+10 |
| G1U9T8;G1U9U0        | 6,21E+09 | 1,92E+10 | 2,18E+10 | 4,51E+09 | 4,79E+09 | 3,56E+09 |
| P33477;G1U9U1        | 0        | 2,95E+08 | 2,98E+08 | 0        | 0        | 0        |
| O02768;U3KM62        | 2,15E+10 | 2,93E+09 | 3,92E+09 | 2,4E+09  | 8,56E+09 | 8,93E+09 |
| O18757               | 6,55E+09 | 8,68E+08 | 7,66E+08 | 4,46E+09 | 4,64E+09 | 5,46E+09 |
| O19048               | 7,55E+09 | 3,91E+10 | 4,09E+10 | 8,08E+09 | 7,89E+09 | 9,64E+09 |
| O19049               | 3,48E+10 | 5,1E+10  | 5,56E+10 | 4,94E+10 | 6,11E+10 | 7,57E+10 |
| O19105;G1SWM3        | 7,73E+08 | 1,38E+08 | 0        | 1,14E+08 | 0        | 0        |
| O46373               | 4,67E+10 | 1,61E+10 | 1,47E+10 | 4,48E+10 | 3,57E+10 | 2,45E+10 |
| O46638;G1TLF0        | 1,13E+09 | 5,84E+09 | 5,91E+09 | 1,09E+09 | 2,69E+09 | 1,61E+09 |
| O62742;O62742-2      | 2,69E+09 | 0        | 0        | 2,33E+09 | 2,4E+09  | 2E+09    |
| O77622;G1T341        | 1,18E+10 | 3,03E+10 | 3,04E+10 | 4,72E+09 | 4,91E+09 | 4,56E+09 |
| G1TVE5;G1TEL6;G1TP34 | 5,66E+08 | 3,22E+09 | 3,14E+09 | 4,31E+08 | 5,45E+08 | 2,48E+08 |

|                      |          |          |          |          |          |          |
|----------------------|----------|----------|----------|----------|----------|----------|
| O77768;G1SW06;G1T4K6 | 1,81E+10 | 2,17E+09 | 1,76E+09 | 6,59E+09 | 1,16E+10 | 1,07E+10 |
| O79431               | 8,13E+09 | 2,04E+09 | 2,24E+09 | 1,24E+10 | 1,45E+10 | 1,41E+10 |
| O79436               | 4,76E+08 | 0        | 0        | 2,5E+08  | 2,25E+08 | 0        |
| O79437               | 1,6E+08  | 65127000 | 0        | 0        | 0        | 77868000 |
| P00169-2;P00169      | 2,99E+10 | 4,69E+09 | 5,13E+09 | 4,93E+10 | 5,85E+10 | 6,97E+10 |
| P00389;G1TV40        | 1,19E+11 | 2,92E+10 | 2,41E+10 | 5,63E+10 | 4,58E+10 | 4,15E+10 |
| P00637;G1TH72        | 0        | 3,1E+08  | 1,58E+08 | 8,53E+08 | 7,21E+08 | 4,82E+08 |
| P00820;A0A0A0MQQ1    | 1,91E+08 | 2,34E+08 | 1,97E+08 | 7,55E+08 | 1,02E+09 | 1,38E+09 |
| P00883               | 3,46E+10 | 1,23E+11 | 1,34E+11 | 2,21E+10 | 3,72E+10 | 2,79E+10 |
| P00919               | 3,89E+09 | 1,11E+10 | 9,24E+09 | 1,4E+10  | 1,63E+10 | 1,11E+10 |
| P00939               | 1,48E+10 | 7,51E+10 | 7,56E+10 | 3,83E+10 | 6,4E+10  | 5,29E+10 |
| P01840               | 0        | 0        | 0        | 1,41E+09 | 0        | 4,41E+08 |
| P01885               | 1,53E+09 | 4,44E+08 | 3,44E+08 | 1E+09    | 1,96E+09 | 1,33E+09 |
| P06140;P01894        | 0        | 0        | 0        | 0        | 0        | 1,5E+08  |
| P01948               | 1,44E+08 | 3,37E+08 | 1E+08    | 5,27E+09 | 1,07E+10 | 2,66E+09 |
| P02057               | 0        | 0        | 0        | 4E+08    | 3,16E+08 | 0        |
| P02251               | 3,43E+09 | 5,98E+09 | 3,93E+09 | 7,94E+08 | 9,4E+08  | 7,32E+08 |
| P02252               | 1,88E+09 | 2,75E+09 | 3,01E+09 | 1,02E+10 | 6,62E+09 | 7,39E+09 |
| P02493               | 1,59E+08 | 2,85E+08 | 2,51E+08 | 5,23E+09 | 2,17E+08 | 1,04E+08 |
| P05176               | 3,8E+08  | 0        | 0        | 1,71E+08 | 2,53E+08 | 0        |
| P06813               | 4,81E+09 | 1,01E+10 | 9,14E+09 | 3,9E+09  | 5,27E+09 | 6,15E+09 |
| P06815               | 0        | 61095000 | 0        | 0        | 0        | 0        |
| P07511               | 0        | 6,51E+08 | 7,11E+08 | 1,02E+08 | 0        | 1,17E+08 |
| P07855               | 3,25E+08 | 5,05E+08 | 7,63E+08 | 0        | 0        | 0        |
| P09451;G1THL2        | 5,66E+09 | 8,58E+08 | 1,29E+09 | 0        | 0        | 0        |
| P10102;G1U7J6;G1THE4 | 9,61E+08 | 4,11E+08 | 5,22E+08 | 1,71E+09 | 1,55E+09 | 1,26E+09 |
| P10160;G1TC37        | 1,11E+10 | 5,55E+10 | 6,66E+10 | 4,92E+09 | 5,75E+09 | 7,52E+09 |
| P11084               | 0        | 0        | 0        | 0        | 50276000 | 0        |
| P11611               | 0        | 4,43E+08 | 2,53E+08 | 0        | 2,27E+08 | 0        |
| P11845;A0A075B6E1    | 1,62E+08 | 1,95E+09 | 1,45E+09 | 3,55E+08 | 7,48E+08 | 2,72E+08 |
| P11909               | 0        | 0        | 4E+08    | 1,38E+09 | 1,71E+09 | 1,43E+09 |
| P80291;P80289;P80292 | 0        | 2,64E+08 | 2,85E+08 | 0        | 36354000 | 0        |
| G1SQD3;U3KNJ4;G1T8G9 | 4,78E+10 | 1,90E+11 | 1,95E+11 | 2,33E+10 | 3,24E+10 | 2,3E+10  |
| P12345               | 8,1E+10  | 1,54E+10 | 1,48E+10 | 4,06E+10 | 3,52E+10 | 4,26E+10 |
| P13280;G1TQZ7        | 2,93E+08 | 1,19E+09 | 1,36E+09 | 3,51E+08 | 5,35E+08 | 3,13E+08 |
| P13491;G1U2T9        | 1,49E+10 | 3,5E+10  | 2,99E+10 | 2,1E+10  | 3,2E+10  | 2,2E+10  |
| P14519               | 3,98E+10 | 6,67E+09 | 6,69E+09 | 6,62E+09 | 5,9E+09  | 8,11E+09 |
| P15122               | 0        | 5,35E+08 | 4,5E+08  | 0        | 1,04E+08 | 1,29E+08 |
| P15253               | 2,47E+11 | 9,28E+10 | 9,58E+10 | 1,83E+11 | 2,17E+11 | 3,08E+11 |
| P15541;G1TE56        | 3,85E+08 | 1,44E+08 | 0        | 0        | 0        | 1,88E+08 |
| P17177;G1SJK7        | 9,85E+08 | 2,32E+08 | 2,05E+08 | 6,5E+08  | 2,73E+08 | 3,71E+08 |
| P80290;P18055        | 9,18E+08 | 4,92E+09 | 3,61E+09 | 3,52E+08 | 8,14E+08 | 3,67E+08 |
| P19943               | 8,73E+09 | 1,32E+10 | 1,17E+10 | 4,61E+09 | 6,5E+09  | 5,93E+09 |
| P20063;G1SDS2        | 3,02E+08 | 1,85E+08 | 1,68E+08 | 0        | 0        | 0        |
| P20614;Z4YNC6        | 3,14E+08 | 1,37E+08 | 2,17E+08 | 1,24E+08 | 1,15E+08 | 1,05E+08 |
| G1TH03;G1SI34;P04191 | 2E+10    | 5,19E+09 | 5,84E+09 | 1,34E+10 | 1,15E+10 | 7,98E+09 |
| P21195               | 3,98E+11 | 1,74E+11 | 1,72E+11 | 3,92E+11 | 4,45E+11 | 6,10E+11 |
| P23612;G1TA78        | 5,6E+08  | 6,02E+09 | 6,37E+09 | 3,26E+08 | 4,15E+08 | 5,83E+08 |
| P24480;G1SNE8        | 1,43E+10 | 9,11E+10 | 9,23E+10 | 4,14E+09 | 6,12E+09 | 8,5E+09  |
| P25704;G1U6X0        | 0        | 0        | 0        | 0        | 60760000 | 0        |

|                        |          |          |          |          |          |          |
|------------------------|----------|----------|----------|----------|----------|----------|
| P27115                 | 2,93E+08 | 1,64E+08 | 85037000 | 1,26E+08 | 1,07E+08 | 1,15E+08 |
| P27124                 | 2,79E+09 | 1,18E+10 | 1,28E+10 | 1,13E+09 | 2,44E+09 | 1,72E+09 |
| P29694;G1TVL1          | 9,55E+09 | 4,12E+10 | 4,69E+10 | 5,88E+09 | 4,96E+09 | 3,26E+09 |
| P29751                 | 3,88E+11 | 6,35E+11 | 6,34E+11 | 2,11E+11 | 2,44E+11 | 2,90E+11 |
| P30801                 | 3,85E+09 | 4,03E+10 | 5,82E+10 | 1,24E+09 | 1,09E+09 | 2,38E+09 |
| P30946;A0A0G2JH20      | 2,39E+10 | 1,05E+11 | 1,08E+11 | 1,47E+10 | 1,74E+10 | 1,78E+10 |
| P30947;G1SUV5;G1SWK6   | 4,99E+10 | 1,71E+11 | 2,02E+11 | 1,72E+10 | 1,86E+10 | 1,85E+10 |
| P32185                 | 0        | 0        | 0        | 0        | 0        | 1,55E+08 |
| P34032                 | 1,59E+09 | 5,5E+09  | 6,03E+09 | 1,87E+09 | 2,12E+09 | 1,16E+09 |
| P35566;G1SW80          | 5,96E+08 | 6,15E+08 | 6,29E+08 | 2,25E+08 | 3,16E+08 | 2,53E+08 |
| P40826                 | 1,68E+09 | 3,5E+09  | 3,35E+09 | 8,39E+08 | 8,15E+08 | 9,57E+08 |
| P41035                 | 1,3E+09  | 2,66E+09 | 2,66E+09 | 9,06E+08 | 1,19E+09 | 8,47E+08 |
| P41111;G1TYD9          | 0        | 0        | 84296000 | 0        | 0        | 0        |
| P41316;G1T4F9          | 3,3E+09  | 4,79E+09 | 2,75E+09 | 1,62E+10 | 1,37E+10 | 1,43E+10 |
| P41975                 | 8,37E+08 | 0        | 0        | 1,9E+09  | 1,25E+09 | 1,86E+09 |
| P41982                 | 1,34E+10 | 2,33E+09 | 2,29E+09 | 5,73E+09 | 7,31E+09 | 7,32E+09 |
| P42675;G1SX63          | 1,24E+09 | 1,08E+09 | 9,17E+08 | 4,71E+08 | 5,81E+08 | 4,45E+08 |
| P43236                 | 3,69E+08 | 1,34E+08 | 0        | 0        | 0        | 0        |
| P43348;G1TM81          | 6,28E+09 | 3,93E+10 | 4,27E+10 | 1,54E+09 | 2,56E+09 | 2,45E+09 |
| P47845                 | 1,63E+10 | 5,94E+10 | 6,11E+10 | 19422000 | 43750000 | 1,03E+08 |
| P51662                 | 1,94E+10 | 1,07E+11 | 1,36E+11 | 1,28E+10 | 1,8E+10  | 1,67E+10 |
| P53787                 | 5,69E+09 | 3,58E+10 | 3,53E+10 | 9,61E+09 | 1,08E+10 | 1,08E+10 |
| P53815;G1TU86;G1SWH9   | 4,27E+09 | 3,79E+08 | 0        | 2,37E+09 | 2,44E+09 | 4,25E+09 |
| P58772                 | 2,36E+09 | 6,41E+09 | 6,01E+09 | 3,56E+09 | 3,1E+09  | 4,81E+09 |
| P58776                 | 0        | 2,42E+08 | 2,22E+08 | 0        | 0        | 0        |
| P62139;P62139-2;G1U3X6 | 4,31E+09 | 1,11E+10 | 1,12E+10 | 3,95E+09 | 3,77E+09 | 3,53E+09 |
| P62493                 | 2,1E+10  | 6,92E+09 | 7,05E+09 | 1,75E+10 | 1,89E+10 | 1,68E+10 |
| P62497;G1U034          | 3,87E+08 | 2,6E+09  | 2,88E+09 | 2,36E+08 | 2,8E+08  | 2,62E+08 |
| G1SY51;G1T0U7;Q8HYX6   | 2,42E+09 | 1,04E+10 | 1,22E+10 | 1,64E+09 | 1,94E+09 | 2,9E+09  |
| P63148;G1T7C8          | 0        | 0        | 0        | 0        | 0        | 1,56E+09 |
| G1TUP4;G1U0U7;G1T1I6   | 1,06E+09 | 3,45E+09 | 3,52E+09 | 6,31E+08 | 1,05E+09 | 9,81E+08 |
| P63169                 | 3,07E+09 | 5,44E+09 | 4,82E+09 | 1,64E+09 | 1,95E+09 | 1,59E+09 |
| P67777;G1TSB1          | 2,26E+09 | 6,3E+09  | 6,7E+09  | 1,11E+09 | 1,13E+09 | 1,01E+09 |
| P67873                 | 1,69E+09 | 2,44E+09 | 1,98E+09 | 1,38E+09 | 1,53E+09 | 1,64E+09 |
| P68105;G1U6W1;G1TM98   | 6,03E+10 | 1,77E+11 | 2,12E+11 | 4,73E+10 | 5,49E+10 | 5,12E+10 |
| P79398                 | 9,94E+08 | 1,26E+09 | 1,5E+09  | 1,02E+09 | 1,03E+09 | 9,88E+08 |
| P80584;G1SGU9;G1U0S3   | 8,76E+08 | 9,24E+09 | 9,45E+09 | 1,49E+09 | 2,18E+09 | 2,02E+09 |
| P80912;G1SV28          | 1,75E+09 | 1,88E+10 | 1,86E+10 | 4,56E+09 | 6,38E+09 | 6,31E+09 |
| P83468                 | 7,05E+08 | 4,38E+09 | 4,5E+09  | 1,41E+09 | 2,43E+09 | 2,56E+09 |
| P98049                 | 1,62E+10 | 2,95E+09 | 2,1E+09  | 1,64E+10 | 1,38E+10 | 9,57E+09 |
| Q01059                 | 0        | 0        | 1,05E+08 | 0        | 0        | 0        |
| Q01971;G1SIQ3;G1TP21   | 1,75E+10 | 6,52E+09 | 6,25E+09 | 2,39E+10 | 2,1E+10  | 1,35E+10 |
| Q09YN4                 | 1,2E+09  | 1,95E+09 | 2,19E+09 | 1,7E+09  | 1,93E+09 | 1,98E+09 |
| Q09YN5                 | 3,81E+08 | 0        | 0        | 94662000 | 0        | 0        |
| Q09YN6;G1TZQ2          | 2,67E+08 | 2,37E+08 | 1,97E+08 | 1,35E+08 | 4,57E+08 | 3,29E+08 |
| Q28618                 | 3,49E+09 | 1,07E+10 | 1,07E+10 | 2,64E+09 | 3,38E+09 | 4,05E+09 |
| Q28619;G1SFP2          | 1,19E+08 | 5,89E+08 | 4,11E+08 | 0        | 1,63E+08 | 0        |
| Q28685                 | 1,04E+08 | 0        | 0        | 2,79E+08 | 0        | 0        |
| Q28709;G1TPC8          | 5,81E+09 | 4,26E+08 | 5,91E+08 | 3,47E+08 | 1,99E+08 | 3,39E+08 |
| Q28717;G1TX59          | 1,78E+08 | 8,52E+08 | 9,91E+08 | 1,52E+08 | 1,04E+08 | 0        |

|                      |          |          |          |          |          |          |
|----------------------|----------|----------|----------|----------|----------|----------|
| Q28740               | 1,2E+10  | 1,34E+09 | 1,64E+09 | 8,37E+09 | 8,88E+09 | 8,32E+09 |
| Q29502;G1TUX8;G1TLL9 | 3,29E+08 | 3,66E+09 | 3,85E+09 | 4,73E+08 | 5,31E+08 | 5,3E+08  |
| Q4PLJ0               | 6,9E+08  | 2,32E+09 | 2,14E+09 | 5,43E+08 | 1,01E+09 | 1,1E+09  |
| Q5UE96               | 0        | 0        | 1,01E+09 | 2,27E+09 | 1,6E+09  | 1,34E+09 |
| Q6SQH4               | 1,01E+10 | 3,69E+10 | 3,25E+10 | 1,75E+09 | 6,2E+09  | 4,01E+09 |
| Q6TYA7               | 1,16E+09 | 2,93E+08 | 3,08E+08 | 1,63E+09 | 1,53E+09 | 1,08E+09 |
| Q71V39               | 0        | 1,38E+08 | 0        | 0        | 0        | 0        |
| Q7YQK3;A0A140TAV7    | 2,82E+10 | 3,57E+09 | 3,51E+09 | 1,02E+10 | 8,34E+09 | 1,08E+10 |
| Q7YQK4               | 4,45E+08 | 0        | 0        | 0        | 0        | 0        |
| Q8HZQ5               | 0        | 5,17E+08 | 0        | 0        | 0        | 0        |
| Q8MI17;G1TNA5        | 2,77E+10 | 1,27E+11 | 1,18E+11 | 1,48E+11 | 1,73E+11 | 1,34E+11 |
| Q8MJF1               | 5,65E+08 | 1,9E+09  | 1,13E+09 | 3,48E+09 | 3,56E+09 | 4,36E+09 |
| Q8MK67               | 6,12E+09 | 3,25E+10 | 3,26E+10 | 9,82E+09 | 1,37E+10 | 1,89E+10 |
| Q8MK68;G1TCG7        | 1,67E+08 | 0        | 0        | 1,32E+08 | 1,22E+08 | 1,16E+08 |
| Q8WMG3               | 3,29E+08 | 0        | 0        | 3,57E+09 | 2,42E+09 | 1,78E+09 |
| Q8WN94               | 7,17E+09 | 4,04E+10 | 4,19E+10 | 2,16E+10 | 3,01E+10 | 3,11E+10 |
| Q95212               | 0        | 1,28E+09 | 1,5E+09  | 0        | 0        | 0        |
| Q95KZ3               | 2,34E+09 | 5,92E+08 | 6,5E+08  | 1,89E+09 | 1,39E+09 | 1,01E+09 |
| Q9BDY9               | 4,11E+08 | 4,88E+08 | 5,46E+08 | 1,53E+09 | 1,49E+09 | 2,13E+09 |
| Q9GJP9               | 0        | 0        | 0        | 6,47E+08 | 0        | 0        |
| Q9GK63;G1TFT0        | 0        | 0        | 0        | 1,07E+09 | 4,24E+08 | 4,07E+08 |
| G1TRJ1;G1TXS8;G1TX79 | 3,39E+09 | 9,11E+08 | 9,14E+08 | 1,15E+09 | 1,02E+09 | 1,09E+09 |
| Q9GLC3;G1SD34;G1TTG6 | 1,04E+10 | 2,48E+09 | 2,68E+09 | 2,81E+10 | 2,87E+10 | 3,12E+10 |
| Q9N0J6;G1SZL4        | 0        | 0        | 0        | 0        | 0        | 63695000 |
| G1SSX6;P27112;G1U418 | 8,16E+10 | 2,26E+10 | 2,15E+10 | 2,48E+11 | 2,21E+11 | 1,83E+11 |
| Q9TT13               | 2,52E+09 | 8,36E+08 | 3,97E+08 | 8,81E+09 | 7,43E+09 | 5,77E+09 |
| Q9TT15               | 2,52E+10 | 9,3E+09  | 7,12E+09 | 4,66E+10 | 5,23E+10 | 4,01E+10 |
| Q9TT37;G1TUE1        | 1,45E+10 | 1,62E+09 | 1,16E+09 | 5,15E+10 | 4,78E+10 | 5,67E+10 |
| G1TC44;G1TX83;G1SU28 | 6,84E+10 | 4,38E+11 | 4,84E+11 | 8,04E+10 | 1,24E+11 | 1,56E+11 |
| Q9TTT8               | 0        | 4,15E+08 | 3,65E+08 | 2,68E+09 | 1,93E+09 | 2,74E+09 |
| Q9TU29               | 1,69E+08 | 0        | 0        | 0        | 0        | 0        |
| Q9XS70               | 9,32E+08 | 2,37E+09 | 2,5E+09  | 4,3E+08  | 4,72E+08 | 4,36E+08 |
| U3KLV2               | 3,76E+08 | 2,39E+08 | 6,92E+08 | 0        | 0        | 0        |
| U3KLV7               | 4,18E+08 | 1,13E+09 | 9,61E+08 | 0        | 2,55E+08 | 2,59E+08 |
| U3KLY7               | 1,62E+09 | 6,65E+09 | 7,07E+09 | 3,53E+09 | 4,35E+09 | 3,65E+09 |
| U3KLZ3               | 3,84E+10 | 1,22E+10 | 1,15E+10 | 3,28E+10 | 2,82E+10 | 3,8E+10  |
| U3KM30               | 3,83E+09 | 5,58E+08 | 4,85E+08 | 8,89E+09 | 5,72E+09 | 6,97E+09 |
| U3KM31;G1SKV7        | 1,63E+09 | 6,66E+09 | 7,89E+09 | 1,99E+09 | 2,78E+09 | 2,71E+09 |
| U3KM64;G1SCE4        | 5,31E+09 | 8,35E+09 | 9,29E+09 | 2,3E+09  | 3,98E+09 | 3,29E+09 |
| U3KM66               | 0        | 0        | 0        | 0        | 0        | 45903000 |
| U3KM71               | 1,17E+10 | 1,92E+09 | 1,69E+09 | 1,56E+10 | 1,35E+10 | 1,46E+10 |
| U3KM78;G1SRB1        | 8,24E+09 | 2,64E+09 | 2,44E+09 | 8,18E+09 | 6,49E+09 | 5,9E+09  |
| U3KM82               | 0        | 0        | 0        | 1,37E+08 | 0        | 0        |
| U3KM83               | 2,8E+08  | 1,38E+08 | 0        | 0        | 3,29E+08 | 2,47E+08 |
| U3KM89;G1SHH1        | 8,6E+08  | 2,93E+08 | 4,21E+08 | 6,66E+08 | 7,17E+08 | 5,04E+08 |
| U3KM96;G1TJ67        | 5,1E+09  | 2,2E+09  | 1,97E+09 | 5,01E+09 | 3,58E+09 | 2,9E+09  |
| U3KMD1               | 4,06E+08 | 1,57E+09 | 1,8E+09  | 4,31E+08 | 5,57E+08 | 3,63E+08 |
| U3KMD4               | 9,45E+08 | 0        | 0        | 2,74E+08 | 3,7E+08  | 0        |
| U3KMI4               | 0        | 0        | 0        | 0        | 0        | 3E+08    |
| U3KMP1               | 3,87E+09 | 1,28E+09 | 1,29E+09 | 4,25E+09 | 2,84E+09 | 1,79E+09 |

|                      |          |          |          |          |          |          |
|----------------------|----------|----------|----------|----------|----------|----------|
| U3KMP2;G1SSS2;P55787 | 0        | 1,8E+08  | 0        | 3,23E+09 | 1,59E+09 | 6,28E+09 |
| U3KMQ6               | 0        | 0        | 0        | 4,78E+08 | 0        | 0        |
| U3KMQ7               | 7,42E+08 | 2,22E+08 | 2,35E+08 | 1,03E+09 | 4,12E+08 | 3,51E+08 |
| U3KMU6               | 1,09E+10 | 2,16E+09 | 2E+09    | 4,12E+09 | 5,5E+09  | 6,43E+09 |
| U3KMU7               | 4,67E+08 | 1,44E+09 | 1,5E+09  | 1,63E+08 | 2,88E+08 | 5,49E+08 |
| U3KMU9               | 0        | 0        | 1,89E+08 | 0        | 0        | 0        |
| U3KMY5               | 1,95E+09 | 2,97E+08 | 1,92E+08 | 5,8E+09  | 4,86E+09 | 5,33E+09 |
| U3KMZ9               | 0        | 2,38E+08 | 2,87E+08 | 1,51E+08 | 1,8E+08  | 1,2E+08  |
| U3KN22               | 3,85E+09 | 1,16E+09 | 7,99E+08 | 5,03E+09 | 6,37E+09 | 1,09E+10 |
| U3KN24               | 4,48E+08 | 4,37E+08 | 2,13E+08 | 1,58E+08 | 0        | 0        |
| U3KN73;G1T286        | 2,47E+08 | 1,41E+09 | 9,9E+08  | 2,06E+08 | 3,29E+08 | 3,49E+08 |
| U3KN87               | 1,11E+08 | 6,35E+08 | 6,77E+08 | 0        | 1,03E+08 | 1,64E+08 |
| U3KNB3               | 3,35E+08 | 6,74E+08 | 1,1E+09  | 2,54E+09 | 3,64E+09 | 3,44E+09 |
| U3KNB6               | 2,13E+09 | 6,72E+09 | 6,01E+09 | 2,12E+09 | 2,37E+09 | 1,97E+09 |
| U3KNB9;G1SE16        | 2,75E+08 | 0        | 2,76E+08 | 5,33E+08 | 3,64E+08 | 4,78E+08 |
| U3KNE2               | 4,16E+09 | 4,69E+08 | 2,87E+08 | 3,76E+09 | 5,17E+09 | 3,92E+09 |
| U3KNI3               | 0        | 0        | 0        | 0        | 0        | 16330000 |
| U3KNK3;G1SW41        | 2,69E+08 | 1,47E+09 | 1,21E+09 | 1,26E+08 | 2,04E+08 | 0        |
| U3KNL7               | 3,12E+08 | 1,39E+09 | 1,13E+09 | 0        | 0        | 0        |
| U3KNP7;G1SL40        | 0        | 9,01E+08 | 8,18E+08 | 1,37E+09 | 1,74E+09 | 1,6E+09  |
| U3KNY1               | 4,96E+09 | 6,67E+08 | 8,03E+08 | 3,07E+10 | 2,34E+10 | 2,09E+10 |
| U3KP42               | 1,02E+09 | 0        | 0        | 9,87E+08 | 1,15E+09 | 1,15E+09 |
| U3KP45               | 0        | 0        | 8,45E+08 | 0        | 0        | 3,87E+08 |
| U3KPA0               | 2,82E+08 | 1,32E+09 | 1,21E+09 | 2,83E+08 | 3,51E+08 | 5,21E+08 |
| U3KPB0;G1SNN6        | 0        | 5,41E+08 | 1,42E+09 | 2,75E+08 | 0        | 2,59E+08 |
| U3KPB2;G1SPE6        | 1,87E+09 | 3,93E+08 | 3,64E+08 | 2,56E+09 | 1,25E+09 | 1,3E+09  |
| U3KPD5               | 0        | 2,44E+09 | 2,27E+09 | 1,29E+08 | 4,36E+08 | 2,05E+08 |
| U3KPG6               | 5,39E+08 | 2,58E+08 | 0        | 2,55E+08 | 0        | 0        |
| U3KPH9               | 0        | 0        | 0        | 0        | 1,53E+08 | 0        |
| U3KPJ0               | 8E+08    | 2,09E+08 | 2,31E+08 | 1,82E+08 | 1,45E+08 | 2,52E+08 |
| U3KPL2               | 3,06E+09 | 6,37E+08 | 6,45E+08 | 9,82E+08 | 8,3E+08  | 6,46E+08 |

**Supplementary Table S2:** List of proteins found to be dysregulated in the *ex-vivo* CE vs. rCEnC proteomic comparison, which have been previously reported having a role in CE.

| Protein Symbol                 | Protein name                                           | CE                                                                                                                                                                                                       |
|--------------------------------|--------------------------------------------------------|----------------------------------------------------------------------------------------------------------------------------------------------------------------------------------------------------------|
| <b>Up-regulated in rCEnC</b>   |                                                        |                                                                                                                                                                                                          |
| AP2B1                          | AP-2 complex subunit beta                              | Neural crest marker gene expressed in neural crest-derived progenitor of CE <sup>1</sup>                                                                                                                 |
| PLA2G4A                        | Cytosolic phospholipase A2                             | Up-regulated in HCEnC after CMV infection <sup>2</sup>                                                                                                                                                   |
| <b>Down-regulated in rCEnC</b> |                                                        |                                                                                                                                                                                                          |
| ATP1B1                         | Sodium/potassium-transporting ATPase subunit beta-1    | Novel locus associated with FECD <sup>3</sup>                                                                                                                                                            |
| COL4A3                         | Collagen alpha-3(IV) chain                             | Mutations in TCF8 cause Posterior Polymorphous CD and ectopic expression of COL4A3 by CE <sup>4</sup> . TCF8 binds the promoter of COL4A3, missense mutations in TCF8 cause Late-Onset FECD <sup>5</sup> |
| COL4A6                         | Collagen alpha-6(IV) chain                             | There is a TCF8 binding site on COL4A6 promoter region, missense mutations in TCF8 cause Late-Onset FECD <sup>5</sup> and Polymorphous CD <sup>4</sup>                                                   |
| ENG                            | Endoglin                                               | Cultured bCEnC were confirmed to express TGF- $\beta$ type 1 and type 2 receptors and endoglin <sup>6</sup>                                                                                              |
| F11R/JAM1/JAMA                 | Junctional adhesion molecule A                         | Putative CE marker <sup>7</sup> , it is expressed in tight junctions of the human CE <sup>8</sup>                                                                                                        |
| GPX1                           | Glutathione peroxidase 1                               | It is increased in HCEnC of older donors by 3.14-fold over those of young donors <sup>9</sup>                                                                                                            |
| HSPA2                          | Heat shock-related 70 kDa protein 2                    | Expressed at higher levels in pediatric HCEnC <sup>10</sup>                                                                                                                                              |
| ITGB5                          | Integrin beta-5                                        | ITGB5 was found to be expressed in cultured HCEnC <sup>11</sup> and significantly slightly upregulated (1.4-fold) in FECD compared to healthy control <sup>12</sup>                                      |
| KTN1                           | Kinectin                                               | Target of miR-182, which is downregulated in CE of old mice compared to young mice <sup>13</sup>                                                                                                         |
| LOXL3                          | Lysyl oxidase homolog 3                                | Found only in CE (not in corneal epithelium and stroma <sup>14</sup> )                                                                                                                                   |
| LRP1/CD91                      | Pro-low-density lipoprotein receptor-related protein 1 | Marker expressed significantly more in transformed (elongated) CE than in normal (patent 2016 <sup>15</sup> )                                                                                            |
| MGARP/C4orf49                  | MGARP                                                  | Expression markers of HCEnC <sup>16</sup>                                                                                                                                                                |
| SPARC/Osteonectin              | SPARC                                                  | Osteonectin/SPARC and fibrillin-1 were found both on its stromal and CE aspects of DM <sup>17</sup> , upregulated in FECD specimens <sup>18</sup>                                                        |
| TF                             | Serotransferrin                                        | Altered in the aqueous humor proteome of patients with FECD <sup>19</sup>                                                                                                                                |
| TMPO/Thymopoietin/LAP2         | Lamina-associated polypeptide 2, isoform alpha         | Target of miR-183, which is downregulated in the CE of old mice compared to young mice <sup>13</sup>                                                                                                     |

## References

- 1 Katikireddy, K. R., Schmedt, T., Price, M. O., Price, F. W. & Jurkunas, U. V. Existence of Neural Crest–Derived Progenitor Cells in Normal and Fuchs Endothelial Dystrophy Corneal Endothelium. *The American journal of pathology* **186**, 2736-2750 (2016).
- 2 Miyazaki, D. *et al.* Corneal endothelial cells activate innate and acquired arm of anti-viral responses after cytomegalovirus infection. *Experimental eye research* **161**, 143-152 (2017).
- 3 Afshari, N. A. *et al.* Genome-wide association study identifies three novel loci in Fuchs endothelial corneal dystrophy. *Nature communications* **8**, 14898 (2017).
- 4 Krafchak, C. M. *et al.* Mutations in TCF8 cause posterior polymorphous corneal dystrophy and ectopic expression of COL4A3 by corneal endothelial cells. *The American Journal of Human Genetics* **77**, 694-708 (2005).
- 5 Riazuddin, S. A. *et al.* Missense mutations in TCF8 cause late-onset Fuchs corneal dystrophy and interact with FCD4 on chromosome 9p. *The American Journal of Human Genetics* **86**, 45-53 (2010).
- 6 Motegi, Y., Usui, T., Ishida, K., Kato, S. & Yamashita, H. Regulation of bovine corneal endothelial cell cycle by transforming growth factor- $\beta$ . *Acta Ophthalmologica Scandinavica* **81**, 517-525 (2003).
- 7 Foster, J. W. *et al.* Cornea organoids from human induced pluripotent stem cells. *Scientific reports* **7**, 41286 (2017).
- 8 Mandell, K. J., Berglin, L., Severson, E. A., Edelhauser, H. F. & Parkos, C. A. Expression of JAM-A in the human corneal endothelium and retinal pigment epithelium: localization and evidence for role in barrier function. *Investigative ophthalmology & visual science* **48**, 3928-3936 (2007).
- 9 Joyce, N. C., Harris, D. L. & Zhu, C. C. Age-related gene response of human corneal endothelium to oxidative stress and DNA damage. *Investigative ophthalmology & visual science* **52**, 1641-1649 (2011).
- 10 Frausto, R. F., Wang, C. & Aldave, A. J. Transcriptome analysis of the human corneal endothelium. *Investigative ophthalmology & visual science* **55**, 7821-7830 (2014).
- 11 Chng, Z. *et al.* High throughput gene expression analysis identifies reliable expression markers of human corneal endothelial cells. *PLoS One* **8**, e67546 (2013).
- 12 Goyer, B. *et al.* Extracellular matrix and integrin expression profiles in Fuchs endothelial corneal dystrophy cells and tissue model. *Tissue Engineering Part A* **24**, 607-615 (2018).
- 13 Zhao, X. *et al.* MicroRNA profile comparison of the corneal endothelia of young and old mice: implications for senescence of the corneal endothelium. *Molecular vision* **19**, 1815 (2013).
- 14 Meade, M. L., Shiyanov, P. & Schlager, J. J. Enhanced detection method for corneal protein identification using shotgun proteomics. *Proteome science* **7**, 23 (2009).
- 15 Koizumi, N., Okumura, N., Hirano, H., Kinoshita, S. & Ueno, M. (Google Patents, 2016).
- 16 Frausto, R. F. & Aldave, A. J. Comparing the transcriptome of ex vivo endothelium with cultured human corneal endothelial cells. *Investigative Ophthalmology & Visual Science* **55**, 3585-3585 (2014).
- 17 Schlötzer-Schrehardt, U., Bachmann, B. O., Laaser, K., Cursiefen, C. & Kruse, F. E. Characterization of the cleavage plane in Descemet's membrane endothelial keratoplasty. *Ophthalmology* **118**, 1950-1957 (2011).
- 18 Weller, J. M. *et al.* Extracellular matrix alterations in late-onset Fuchs' corneal dystrophy. *Investigative ophthalmology & visual science* **55**, 3700-3708 (2014).
- 19 Richardson, M. R. *et al.* Alterations in the aqueous humor proteome in patients with Fuchs endothelial corneal dystrophy. *Molecular vision* **16**, 2376 (2010).
